# Supplementary material for: Ribosomal proteins: mutant phenotypes by the numbers and associated gene expression changes
Source: Open Biol. 2020 Aug 19;10(8):200114. doi: 10.1098/rsob.200114 (PMC7479938; doi:10.1098/rsob.200114)
Supplement: Fish MCA datasets [file rsob200114supp5.xlsx]

## Sheet: fish_phenotypes
	anatomical system quality	angiogenesis disrupted	apoptotic process increased	ball deformed	ball increased size	ball opaque	blood apoptotic process increased process quality	blood cell hemoglobin complex decreased amount	blood circulation disrupted	brain aplastic	brain apoptotic	brain malformed	brain morphogenesis disrupted	brain necrotic	brain quality	brain segmentation disrupted	brain structure	caudal fin apoptotic process increased process quality	caudal fin curved	caudal fin shortened	cell aging decreased magnitude	cell cycle disrupted	cell death increased occurrence	cell population proliferation decreased occurrence	central nervous system necrotic	cerebellum aplastic	cerebellum decreased thickness	common cardinal vein circulating cell decreased amount	convergent extension involved in gastrulation disrupted	cranial cartilage malformed	cranium edematous	definitive hemopoiesis disrupted	digestive system position	dorsal aorta morphology	embryo development arrested	embryo development delayed	embryo development disrupted	embryo development process quality	embryonic cranial skeleton morphogenesis decreased process quality	embryonic hemopoiesis decreased process quality	embryonic neurocranium morphogenesis decreased process quality	erythrocyte development disrupted	erythrocyte differentiation decreased occurrence	erythrocyte differentiation disrupted	erythroid lineage cell absent	erythroid lineage cell decreased amount	erythroid lineage cell increased size	establishment of cell polarity disrupted	establishment of mitotic spindle orientation disrupted
rack1	n	n	n	n	n	n	n	n	y	n	n	n	n	n	n	n	n	n	n	n	n	n	y	n	n	n	n	n	y	n	n	n	n	n	n	n	n	n	n	n	n	n	n	n	n	n	n	y	y
rpl10	n	n	n	n	n	n	n	n	n	n	n	n	n	n	n	n	n	n	n	n	n	n	n	n	n	n	n	n	n	n	n	n	n	n	n	n	n	n	n	n	n	n	n	n	n	n	n	n	n
rpl11	y	n	y	n	n	n	n	n	n	n	y	n	n	n	n	n	y	n	n	y	y	n	n	y	y	y	n	y	n	n	n	n	n	n	n	n	n	n	n	n	n	n	n	n	y	y	y	n	n
rpl12	y	n	n	n	n	n	n	n	n	n	n	n	n	n	y	n	n	n	n	n	n	n	n	n	y	n	n	n	n	n	n	n	n	n	n	n	n	n	n	n	n	n	n	n	n	n	n	n	n
rpl13	n	n	n	n	n	n	n	n	n	n	n	n	n	n	n	n	n	n	n	n	n	n	n	n	y	n	n	n	n	n	n	n	n	n	n	n	n	n	n	n	n	n	n	n	n	n	n	n	n
rpl14	n	n	n	n	n	n	n	n	n	n	n	n	n	y	n	n	n	n	n	n	n	n	n	n	y	n	n	n	n	n	n	n	n	n	n	n	n	n	n	n	n	n	n	n	n	n	n	n	n
rpl19	n	n	n	n	n	n	n	n	n	n	n	n	n	y	n	n	n	n	n	n	n	n	n	n	y	n	n	n	n	n	n	n	n	n	n	n	n	n	n	n	n	n	n	n	n	n	n	n	n
rpl23	n	n	y	n	n	n	n	n	n	n	n	y	y	n	n	n	n	n	n	n	n	n	n	n	n	n	n	n	n	n	n	n	n	n	n	n	n	n	n	n	n	n	n	n	n	n	n	n	n
rpl23a	n	n	n	n	n	n	n	n	n	n	n	n	n	n	n	n	n	n	n	n	n	n	n	n	n	n	n	n	n	n	n	n	n	n	n	n	n	n	n	n	n	n	n	n	n	n	n	n	n
rpl24	n	n	n	n	y	n	n	n	n	n	n	n	n	n	n	n	n	n	n	n	n	n	n	n	n	n	n	n	n	n	n	n	n	n	n	n	n	n	n	n	n	n	n	n	n	n	n	n	n
rpl27	n	n	n	n	n	n	n	n	n	n	n	n	n	n	n	n	n	n	n	n	n	n	n	n	n	n	n	n	n	n	n	n	n	n	n	n	n	n	n	n	n	n	n	y	n	n	n	n	n
rpl28	y	n	n	n	y	n	n	n	n	n	n	n	n	n	n	n	n	n	n	n	n	n	n	n	y	y	n	n	n	n	n	n	n	n	n	n	n	n	n	n	n	n	n	n	n	n	n	n	n
rpl3	n	n	n	n	n	n	n	n	n	n	n	n	n	n	n	n	n	n	n	n	n	n	n	n	y	n	n	n	n	n	n	n	n	n	n	n	n	n	n	n	n	n	n	n	n	n	n	n	n
rpl35	n	n	n	n	y	y	n	n	n	y	n	n	n	n	y	n	n	n	n	n	n	n	n	n	y	n	n	n	n	n	n	n	n	n	n	y	n	n	n	n	n	n	n	n	n	n	n	n	n
rpl35a	n	n	n	n	y	n	n	n	n	y	n	n	n	n	n	n	n	n	n	n	n	n	n	n	n	n	n	n	n	n	n	n	n	n	n	n	n	n	n	n	n	n	n	n	n	n	n	n	n
rpl36	n	n	n	n	n	n	n	n	n	n	n	n	n	n	n	n	n	n	n	n	n	n	n	n	y	n	n	n	n	n	n	n	n	n	n	n	n	n	n	n	n	n	n	n	n	n	n	n	n
rpl36a	n	n	n	n	y	n	n	n	n	n	n	n	n	y	n	n	n	n	n	n	n	n	n	n	y	n	n	n	n	n	n	n	n	n	n	n	n	y	n	n	n	n	n	n	n	n	n	n	n
rpl38	n	n	n	n	n	n	n	n	n	n	n	n	n	n	n	n	n	n	n	n	n	n	n	n	n	n	y	n	n	n	n	n	n	n	n	n	n	n	n	n	n	n	n	n	n	n	n	n	n
rpl5a	n	n	y	n	y	n	n	n	n	n	n	y	y	n	n	n	n	n	n	n	n	n	n	n	n	y	n	n	n	n	n	y	n	n	n	n	y	n	y	n	y	n	n	n	n	n	n	n	n
rpl6	y	n	n	n	y	n	n	n	n	n	n	n	n	n	y	n	n	n	n	n	n	n	n	n	n	n	y	n	n	n	n	n	n	n	n	n	n	n	n	n	n	n	n	n	n	n	n	n	n
rpl7	n	n	n	n	n	n	n	n	n	n	n	n	n	n	n	n	n	n	n	n	n	n	n	n	y	n	n	n	n	n	n	n	n	n	n	n	n	n	n	n	n	n	n	n	n	n	n	n	n
rpl7l1	n	n	n	n	n	n	n	n	n	n	n	n	n	n	n	n	n	n	n	n	n	n	n	n	n	n	n	n	n	n	n	n	n	n	n	n	n	n	n	n	n	n	n	n	n	n	n	n	n
rpl9	n	n	n	n	n	n	n	n	n	n	n	n	n	n	n	n	n	n	n	n	n	n	n	n	n	n	n	n	n	n	n	n	n	n	n	n	n	n	n	n	n	n	n	n	n	n	n	n	n
rplp0	n	n	n	n	n	n	n	n	n	n	n	n	n	n	n	n	n	n	n	n	n	n	n	n	n	n	y	n	n	n	n	n	n	n	n	n	n	n	n	n	n	n	n	n	n	n	n	n	n
rplp1	n	n	n	n	n	n	n	n	n	y	n	n	n	n	n	n	n	n	n	n	n	n	n	n	n	n	n	n	n	n	n	n	n	n	n	n	n	n	n	n	n	n	n	n	n	n	n	n	n
rps11	y	n	n	n	n	n	n	n	n	n	n	n	n	n	y	n	n	n	n	n	n	n	n	n	y	n	n	n	n	n	n	n	n	n	n	n	n	n	n	n	n	n	n	n	n	n	n	n	n
rps12	n	n	n	n	n	n	n	n	n	n	n	n	n	n	n	n	n	n	n	n	n	n	n	n	n	n	n	n	n	n	n	n	n	n	n	n	n	n	n	n	n	n	n	n	n	n	n	n	n
rps15	n	n	n	n	n	n	n	n	n	n	n	n	n	n	n	n	n	n	n	n	n	n	n	n	y	n	y	n	n	n	n	n	n	n	n	n	n	n	n	n	n	n	n	n	n	n	n	n	n
rps15a	n	n	n	n	y	n	n	n	n	n	n	n	n	n	n	n	n	n	n	n	n	n	n	n	y	n	y	n	n	n	n	n	n	n	n	n	n	n	n	n	n	n	n	n	n	n	n	n	n
rps19	n	n	y	n	y	n	y	n	n	n	n	n	n	y	n	y	n	n	y	n	n	n	n	n	n	n	y	n	n	y	y	n	y	n	y	n	n	n	n	n	n	y	y	n	y	n	n	n	n
rps23	n	y	y	y	y	n	n	n	n	n	n	n	n	n	n	n	n	n	n	n	n	n	n	n	y	y	n	n	n	n	n	n	n	y	n	n	n	n	n	n	n	y	n	n	n	n	n	n	n
rps27.1	n	n	n	n	n	n	n	n	n	n	n	y	n	n	n	n	n	n	n	n	n	n	n	n	n	n	n	n	n	n	n	n	n	n	n	n	n	n	n	n	n	n	n	y	n	n	n	n	n
rps28	n	n	n	n	n	n	n	n	n	n	n	n	n	n	n	n	n	n	n	n	n	n	n	n	n	n	n	n	n	n	n	n	n	n	n	n	n	n	n	n	n	n	n	n	n	n	n	n	n
rps29	n	y	y	y	y	n	n	n	n	n	n	n	n	n	n	n	n	n	n	n	n	n	n	n	y	y	n	n	n	n	n	n	n	y	n	n	n	n	n	n	n	y	n	n	n	n	n	n	n
rps3	n	n	n	y	n	y	n	n	n	y	n	n	n	n	n	n	n	n	n	n	n	n	n	n	n	y	n	n	n	n	n	n	n	n	n	n	n	n	n	n	n	n	n	n	n	n	n	n	n
rps3a	n	n	n	n	y	y	n	n	n	n	n	n	n	y	n	n	n	n	n	n	n	n	n	n	y	y	n	n	n	n	n	n	n	n	n	n	n	n	n	n	n	n	n	n	n	n	n	n	n
rps4x	n	n	n	n	y	n	n	n	n	n	n	n	n	n	n	n	n	n	n	n	n	n	n	n	n	y	n	n	n	n	n	n	n	n	n	n	n	n	n	n	n	n	n	n	n	n	n	n	n
rps5	n	n	n	n	n	n	n	n	n	n	n	n	n	y	n	n	n	n	n	n	n	n	n	n	y	n	n	n	n	n	n	n	n	n	n	n	n	n	n	n	n	n	n	n	n	n	n	n	n
rps7	n	n	y	n	n	n	n	y	n	n	y	n	n	n	n	n	n	y	n	n	n	y	n	n	y	n	n	n	n	n	n	n	n	n	n	n	n	n	n	y	n	n	n	n	n	n	n	n	n
rps8a	n	n	n	n	y	n	n	n	n	n	n	n	n	n	n	n	n	n	n	n	n	n	n	n	y	y	n	n	n	n	n	n	n	n	n	n	n	n	n	n	n	n	n	n	n	n	n	n	n
rpsa	n	n	n	n	n	n	n	n	n	n	n	n	n	y	n	n	n	n	n	n	n	n	n	n	y	n	n	n	n	n	n	n	n	n	n	n	n	n	n	n	n	n	n	n	n	n	n	n	n
[truncated: 174 more columns]

## Sheet: fish_eigen
	eigenvalue	percentage of variance	cumulative percentage of variance
dim 1	0.0319509	38.3375	38.3375
dim 2	0.0235986	28.3156	66.6531
dim 3	0.00659343	7.91138	74.5645
dim 4	0.00600996	7.21128	81.7758
dim 5	0.00390057	4.68024	86.456
dim 6	0.00237434	2.84894	89.305
dim 7	0.00208903	2.50661	91.8116
dim 8	0.00140605	1.6871	93.4987
dim 9	0.00096761	1.16102	94.6597
dim 10	0.000854917	1.02581	95.6855
dim 11	0.000718044	0.861572	96.5471
dim 12	0.000492738	0.59123	97.1383
dim 13	0.000433879	0.520606	97.6589
dim 14	0.000343319	0.411945	98.0708
dim 15	0.000276329	0.331564	98.4024
dim 16	0.000207137	0.248541	98.6509
dim 17	0.000170692	0.204812	98.8558
dim 18	0.000162332	0.194781	99.0505
dim 19	0.000138368	0.166026	99.2166
dim 20	0.000120669	0.14479	99.3614
dim 21	9.15806e-05	0.109887	99.4712
dim 22	7.32529e-05	0.0878953	99.5591
dim 23	7.22547e-05	0.0866976	99.6458
dim 24	6.01202e-05	0.0721375	99.718
dim 25	4.90619e-05	0.0588688	99.7768
dim 26	4.28907e-05	0.0514641	99.8283
dim 27	2.99194e-05	0.0358999	99.8642
dim 28	2.44656e-05	0.029356	99.8936
dim 29	2.24746e-05	0.0269669	99.9205
dim 30	1.71426e-05	0.0205692	99.9411
dim 31	1.52197e-05	0.0182619	99.9594
dim 32	1.03427e-05	0.0124101	99.9718
dim 33	8.11199e-06	0.00973348	99.9815
dim 34	6.2718e-06	0.00752546	99.989
dim 35	3.94377e-06	0.00473208	99.9938
dim 36	2.63305e-06	0.00315937	99.9969
dim 37	1.41174e-06	0.00169393	99.9986
dim 38	7.68562e-07	0.000922188	99.9995
dim 39	2.10789e-07	0.000252923	99.9998
dim 40	1.78035e-07	0.000213623	100

## Sheet: fish_Dim1
	R2	p.value
brain.structure	0.881971	1.07954e-19
caudal.fin.shortened	0.881971	1.07954e-19
cell.aging.decreased.magnitude	0.881971	1.07954e-19
cell.population.proliferation.decreased.occurrence	0.881971	1.07954e-19
common.cardinal.vein.circulating.cell.decreased.amount	0.881971	1.07954e-19
erythroid.lineage.cell.decreased.amount	0.881971	1.07954e-19
erythroid.lineage.cell.increased.size	0.881971	1.07954e-19
extension.decreased.size	0.881971	1.07954e-19
extension.morphology	0.881971	1.07954e-19
eye.pigmentation.delayed	0.881971	1.07954e-19
gut.absent	0.881971	1.07954e-19
gut.aplastic	0.881971	1.07954e-19
gut.immature	0.881971	1.07954e-19
head.aplastic	0.881971	1.07954e-19
head.opaque	0.881971	1.07954e-19
inner.ear.morphology	0.881971	1.07954e-19
intermediate.cell.mass.of.mesoderm.cell.population.proliferation.decreased.occurrence	0.881971	1.07954e-19
intermediate.cell.mass.of.mesoderm.hematopoietic.multipotent.progenitor.cell.decreased.amount	0.881971	1.07954e-19
liver.absent	0.881971	1.07954e-19
liver.immature	0.881971	1.07954e-19
midbrain.hindbrain.boundary.structural.organization.disrupted	0.881971	1.07954e-19
mouth.absent	0.881971	1.07954e-19
nucleate.erythrocyte.increased.size	0.881971	1.07954e-19
nucleate.erythrocyte.irregularly.shaped	0.881971	1.07954e-19
nucleate.erythrocyte.maturation.disrupted	0.881971	1.07954e-19
otolith.deformed	0.881971	1.07954e-19
regulation.of.glucose.metabolic.process.disrupted	0.881971	1.07954e-19
regulation.of.transcription.DNA.templated.disrupted	0.881971	1.07954e-19
swim.bladder.absent	0.881971	1.07954e-19
whole.organism.decreased.pigmentation	0.881971	1.07954e-19
whole.organism.polysome.decreased.amount	0.881971	1.07954e-19
erythroid.lineage.cell.absent	0.788105	1.02778e-14
hemoglobin.biosynthetic.process.decreased.process.quality	0.788105	1.02778e-14
hemopoiesis.process.quality	0.788105	1.02778e-14
whole.organism.decreased.life.span	0.788105	1.02778e-14
brain.apoptotic	0.465805	8.87652e-07
hindbrain.morphology	0.456032	1.27625e-06
forebrain.increased.size	0.454881	1.33151e-06
heart.edematous	0.424631	3.93732e-06
yolk.edematous	0.406547	7.34113e-06
protein.kinase.B.signaling.decreased.occurrence	0.318606	0.000121035
ribosomal.protein.S6.kinase.activity.increased.occurrence	0.318606	0.000121035
head.apoptotic.process.increased.occurrence	0.31192	0.000147781
trunk.bent	0.301377	0.000201791
otic.placode.shape	0.280701	0.000367522
apoptotic.process.increased	0.24043	0.00113599
whole.organism.decreased.length	0.185992	0.00487526
anatomical.system.quality	0.1727	0.00689063
yolk.quality	0.1727	0.00689063
forebrain.protruding	0.167153	0.00795377
fourth.ventricle.increased.size	0.163053	0.00884098
nervous.system.quality	0.162955	0.00886324
fin.deformed	0.142086	0.0151265
midbrain.hindbrain.boundary.aplastic	0.132187	0.0194588
optic.tectum.opaque	0.122456	0.0249072
fourth.ventricle.opaque	0.122321	0.0249924
liver.quality	0.112475	0.0320703
nucleate.erythrocyte.decreased.amount	0.105591	0.0381761
cerebellum.aplastic	0.0983115	0.0459071
blood.apoptotic.process.increased.process.quality	0.0903277	0.0562207
brain.segmentation.disrupted	0.0903277	0.0562207
caudal.fin.curved	0.0903277	0.0562207
cranial.cartilage.malformed	0.0903277	0.0562207
cranium.edematous	0.0903277	0.0562207
digestive.system.position	0.0903277	0.0562207
embryo.development.arrested	0.0903277	0.0562207
erythrocyte.differentiation.decreased.occurrence	0.0903277	0.0562207
eye.aplastic	0.0903277	0.0562207
eye.hypoplastic	0.0903277	0.0562207
eye.immature	0.0903277	0.0562207
forebrain.aplastic	0.0903277	0.0562207
forebrain.decreased.size	0.0903277	0.0562207
heart.primordium.position	0.0903277	0.0562207
hematopoietic.stem.cell.decreased.amount	0.0903277	0.0562207
intermediate.cell.mass.of.mesoderm.erythroblast.increased.amount	0.0903277	0.0562207
lens.absent	0.0903277	0.0562207
nucleate.erythrocyte.apoptotic	0.0903277	0.0562207
optic.primordium.decreased.size	0.0903277	0.0562207
optic.tectum.aplastic	0.0903277	0.0562207
otic.vesicle.decreased.size	0.0903277	0.0562207
pharyngeal.arch.3.7.immature	0.0903277	0.0562207
thymus.T.cell.decreased.amount	0.0903277	0.0562207
whole.organism.anterior.posterior.axis.curved	0.0903277	0.0562207
whole.organism.apoptotic	0.0903277	0.0562207
whole.organism.morphology	0.0903277	0.0562207
whole.organism.ribosome.decreased.amount	0.0903277	0.0562207
optic.tectum.increased.size	0.0889937	0.0581606
otic.placode.decreased.size	0.0864827	0.0619995
gut.quality	0.078042	0.0769165
pericardium.edematous	0.0712989	0.0914736
post.vent.region.morphology	0.070139	0.0942536
otolith.organ.decreased.size	0.0448752	0.183643
trunk.curved	0.0418036	0.199742
yolk.grey	0.0364394	0.23188
head.apoptotic.process.increased.process.quality	0.0315231	0.266761
midbrain.hindbrain.boundary.morphology	0.0315136	0.266835
erythrocyte.development.disrupted	0.028925	0.28774
forebrain.morphology	0.028925	0.28774
nucleate.erythrocyte.hemoglobin.complex.decreased.amount	0.028925	0.28774
trunk.decreased.thickness	0.0248421	0.325027
fourth.ventricle.distended	0.0236512	0.337052
liver.hypoplastic	0.0234773	0.338855
extension.decreased.thickness	0.0196121	0.382501
eye.decreased.size	0.0192402	0.387095
midbrain.hindbrain.boundary.condensed	0.0181378	0.401179
head.decreased.size	0.0177334	0.406527
whole.organism.viability	0.016944	0.417266
peripheral.nervous.system.nerve.neoplastic	0.0163437	0.425711
tegmentum.opaque	0.0159035	0.432065
central.nervous.system.necrotic	0.0135003	0.469414
gut.hypoplastic	0.0120881	0.493783
midbrain.hindbrain.boundary.quality	0.0112517	0.509212
yolk.non.functional	0.00873264	0.561151
hindbrain.opaque	0.00866925	0.562582
peripheral.nervous.system.chromosome.amount	0.00848993	0.566669
otic.placode.aplastic	0.00837773	0.569254
yolk.circular	0.00739434	0.592947
cerebellum.decreased.thickness	0.00728794	0.595629
trunk.curved.dorsal	0.00702864	0.602272
hindbrain.undulate	0.00550527	0.64477
heart.quality	0.00539152	0.648218
head.flat	0.00511022	0.656937
hindbrain.quality	0.00500836	0.660165
erythrocyte.differentiation.disrupted	0.00458759	0.673926
trunk.necrotic	0.00334625	0.719411
swim.bladder.inflation.disrupted	0.00303529	0.73226
swim.bladder.quality	0.00303529	0.73226
brain.malformed	0.00295824	0.735556
extension.deformed	0.0027753	0.743578
forebrain.apoptotic.process.increased.process.quality	0.00276826	0.743892
head.cytosolic.ribosome.increased.amount	0.00276826	0.743892
head.polysome.decreased.amount	0.00276826	0.743892
hindbrain.apoptotic.process.increased.process.quality	0.00276826	0.743892
trunk.atrophied	0.00270291	0.746832
yolk.swollen	0.00268125	0.747816
whole.organism.edematous	0.00260757	0.751193
brain.aplastic	0.00253767	0.754446
blood.circulation.disrupted	0.00237738	0.762095
cell.death.increased.occurrence	0.00237738	0.762095
convergent.extension.involved.in.gastrulation.disrupted	0.00237738	0.762095
establishment.of.cell.polarity.disrupted	0.00237738	0.762095
establishment.of.mitotic.spindle.orientation.disrupted	0.00237738	0.762095
intersegmental.vessel.decreased.functionality	0.00237738	0.762095
notochord.increased.width	0.00237738	0.762095
somite.increased.width	0.00237738	0.762095
whole.organism.curved.ventral	0.00237738	0.762095
exocrine.pancreas.decreased.size	0.00228048	0.766856
exocrine.pancreas.development.disrupted	0.00228048	0.766856
lens.decreased.size	0.00216724	0.772561
fin.aplastic	0.00211963	0.775007
midbrain.aplastic	0.00196878	0.782961
telencephalon.morphology	0.00192093	0.785552
midbrain.hindbrain.boundary.decreased.thickness	0.00189519	0.786961
telencephalon.hypoplastic	0.00158372	0.804881
brain.quality	0.0015362	0.807774
embryo.development.process.quality	0.00149149	0.81054
extension.yolk.absent	0.00149149	0.81054
ventricular.system.increased.size	0.00149149	0.81054
extension.decreased.length	0.00141671	0.815266
ball.increased.size	0.00131637	0.821819
notochord.undulate	0.00128472	0.823939
telencephalon.decreased.size	0.00128092	0.824196
eye.color	0.00119646	0.830003
pancreas.decreased.volume	0.00114845	0.833399
pancreas.development.delayed	0.00114845	0.833399
pancreas.morphogenesis.disrupted	0.00114845	0.833399
whole.organism.decreased.size	0.00111127	0.836081
brain.necrotic	0.00102359	0.842596
brain.morphogenesis.disrupted	0.000998016	0.84455
whole.organism.shape	0.000979707	0.845965
lens.increased.size	0.000950531	0.848249
ball.opaque	0.000867448	0.854959
trunk.undulate	0.000860866	0.855504
fin.decreased.thickness	0.000729892	0.866842
fourth.ventricle.decreased.size	0.000729892	0.866842
testis.seminoma.present	0.000706694	0.868957
whole.organism.Lymphoid.neoplasms.neoplastic.malignant	0.000706694	0.868957
ball.deformed	0.00057396	0.881806
embryo.development.delayed	0.000508549	0.8887
retina.decreased.size	0.000440722	0.896345
notochord.bent	0.000425619	0.898127
otolith.organ.deformed	0.000381683	0.903502
trunk.curved.ventral	0.000226012	0.925673
trunk.degenerate	0.000226012	0.925673
yolk.syncytial.layer.decreased.thickness	0.000226012	0.925673
blood.cell.hemoglobin.complex.decreased.amount	0.00019389	0.931143
caudal.fin.apoptotic.process.increased.process.quality	0.00019389	0.931143
cell.cycle.disrupted	0.00019389	0.931143
embryonic.hemopoiesis.decreased.process.quality	0.00019389	0.931143
hemopoiesis.decreased.process.quality	0.00019389	0.931143
hindbrain.inflated	0.00019389	0.931143
nucleate.erythrocyte.autophagy.increased.occurrence	0.00019389	0.931143
nucleate.erythrocyte.has.extra.parts.of.type.nucleate.erythrocyte.autolysosome	0.00019389	0.931143
nucleate.erythrocyte.has.extra.parts.of.type.nucleate.erythrocyte.autophagosome	0.00019389	0.931143
whole.organism.anterior.region.necrotic	0.00019389	0.931143
whole.organism.autophagy.increased.occurrence	0.00019389	0.931143
whole.organism.Golgi.apparatus.morphology	0.00019389	0.931143
whole.organism.has.fewer.parts.of.type.nucleate.erythrocyte	0.00019389	0.931143
whole.organism.mitochondrion.morphology	0.00019389	0.931143
fourth.ventricle.edematous	9.72443e-05	0.951207
angiogenesis.disrupted	9.2472e-05	0.952418
dorsal.aorta.morphology	9.2472e-05	0.952418
hematopoietic.stem.cell.differentiation.disrupted	9.2472e-05	0.952418
intersegmental.vessel.aplastic	9.2472e-05	0.952418
thymus.primordium.common.lymphoid.progenitor.absent	9.2472e-05	0.952418
vasculogenesis.disrupted	9.2472e-05	0.952418
ventral.wall.of.dorsal.aorta.hematopoietic.stem.cell.absent	9.2472e-05	0.952418
peripheral.nervous.system.chromosome.am	4.07529e-05	0.968402
primitive.hemopoiesis.disrupted	3.20287e-05	0.971986
trunk.decreased.length	2.97148e-05	0.973017
head.protruding	2.23777e-05	0.976583
definitive.hemopoiesis.disrupted	1.50094e-05	0.980821
embryo.development.disrupted	1.50094e-05	0.980821
embryonic.cranial.skeleton.morphogenesis.decreased.process.quality	1.50094e-05	0.980821
embryonic.neurocranium.morphogenesis.decreased.process.quality	1.50094e-05	0.980821
fourth.ventricle.morphology	1.50094e-05	0.980821
heart.nucleate.erythrocyte.decreased.amount	1.50094e-05	0.980821
mandibular.arch.skeleton.malformed	1.50094e-05	0.980821
neurocranium.malformed	1.50094e-05	0.980821
optic.tectum.morphology	1.50094e-05	0.980821
head.circular	7.19738e-06	0.986718
pancreas.hypoplastic	7.19738e-06	0.986718
trunk.increased.width	2.36986e-08	0.999238

## Sheet: fish_Dim2
	R2	p.value
blood.apoptotic.process.increased.process.quality	0.876894	2.46103e-19
brain.segmentation.disrupted	0.876894	2.46103e-19
caudal.fin.curved	0.876894	2.46103e-19
cranial.cartilage.malformed	0.876894	2.46103e-19
cranium.edematous	0.876894	2.46103e-19
digestive.system.position	0.876894	2.46103e-19
embryo.development.arrested	0.876894	2.46103e-19
erythrocyte.differentiation.decreased.occurrence	0.876894	2.46103e-19
eye.aplastic	0.876894	2.46103e-19
eye.hypoplastic	0.876894	2.46103e-19
eye.immature	0.876894	2.46103e-19
forebrain.aplastic	0.876894	2.46103e-19
forebrain.decreased.size	0.876894	2.46103e-19
heart.primordium.position	0.876894	2.46103e-19
hematopoietic.stem.cell.decreased.amount	0.876894	2.46103e-19
intermediate.cell.mass.of.mesoderm.erythroblast.increased.amount	0.876894	2.46103e-19
lens.absent	0.876894	2.46103e-19
nucleate.erythrocyte.apoptotic	0.876894	2.46103e-19
optic.primordium.decreased.size	0.876894	2.46103e-19
optic.tectum.aplastic	0.876894	2.46103e-19
otic.vesicle.decreased.size	0.876894	2.46103e-19
pharyngeal.arch.3.7.immature	0.876894	2.46103e-19
thymus.T.cell.decreased.amount	0.876894	2.46103e-19
whole.organism.anterior.posterior.axis.curved	0.876894	2.46103e-19
whole.organism.apoptotic	0.876894	2.46103e-19
whole.organism.morphology	0.876894	2.46103e-19
whole.organism.ribosome.decreased.amount	0.876894	2.46103e-19
trunk.curved	0.494991	2.88684e-07
otolith.organ.decreased.size	0.447384	1.75095e-06
head.apoptotic.process.increased.process.quality	0.438747	2.39024e-06
erythrocyte.development.disrupted	0.387247	1.40037e-05
forebrain.morphology	0.387247	1.40037e-05
nucleate.erythrocyte.hemoglobin.complex.decreased.amount	0.387247	1.40037e-05
midbrain.hindbrain.boundary.morphology	0.311651	0.000148967
tegmentum.opaque	0.272505	0.000464272
hindbrain.opaque	0.218093	0.00208285
otic.placode.aplastic	0.208634	0.00268234
erythroid.lineage.cell.absent	0.189072	0.00449749
hemoglobin.biosynthetic.process.decreased.process.quality	0.189072	0.00449749
hemopoiesis.process.quality	0.189072	0.00449749
whole.organism.decreased.life.span	0.189072	0.00449749
cerebellum.decreased.thickness	0.178903	0.00586549
hindbrain.undulate	0.157858	0.0101047
fin.aplastic	0.147058	0.0133243
retina.decreased.size	0.127797	0.0217529
ball.increased.size	0.124297	0.023772
brain.structure	0.108391	0.0355632
caudal.fin.shortened	0.108391	0.0355632
cell.aging.decreased.magnitude	0.108391	0.0355632
cell.population.proliferation.decreased.occurrence	0.108391	0.0355632
common.cardinal.vein.circulating.cell.decreased.amount	0.108391	0.0355632
erythroid.lineage.cell.decreased.amount	0.108391	0.0355632
erythroid.lineage.cell.increased.size	0.108391	0.0355632
extension.decreased.size	0.108391	0.0355632
extension.morphology	0.108391	0.0355632
eye.pigmentation.delayed	0.108391	0.0355632
gut.absent	0.108391	0.0355632
gut.aplastic	0.108391	0.0355632
gut.immature	0.108391	0.0355632
head.aplastic	0.108391	0.0355632
head.opaque	0.108391	0.0355632
inner.ear.morphology	0.108391	0.0355632
intermediate.cell.mass.of.mesoderm.cell.population.proliferation.decreased.occurrence	0.108391	0.0355632
intermediate.cell.mass.of.mesoderm.hematopoietic.multipotent.progenitor.cell.decreased.amount	0.108391	0.0355632
liver.absent	0.108391	0.0355632
liver.immature	0.108391	0.0355632
midbrain.hindbrain.boundary.structural.organization.disrupted	0.108391	0.0355632
mouth.absent	0.108391	0.0355632
nucleate.erythrocyte.increased.size	0.108391	0.0355632
nucleate.erythrocyte.irregularly.shaped	0.108391	0.0355632
nucleate.erythrocyte.maturation.disrupted	0.108391	0.0355632
otolith.deformed	0.108391	0.0355632
regulation.of.glucose.metabolic.process.disrupted	0.108391	0.0355632
regulation.of.transcription.DNA.templated.disrupted	0.108391	0.0355632
swim.bladder.absent	0.108391	0.0355632
whole.organism.decreased.pigmentation	0.108391	0.0355632
whole.organism.polysome.decreased.amount	0.108391	0.0355632
brain.necrotic	0.103831	0.0399157
brain.apoptotic	0.0796384	0.0738359
heart.edematous	0.0773598	0.0782733
yolk.edematous	0.069975	0.0946537
apoptotic.process.increased	0.0694504	0.0959456
midbrain.hindbrain.boundary.aplastic	0.0681516	0.0992246
optic.tectum.opaque	0.0680658	0.0994452
fourth.ventricle.increased.size	0.0663698	0.103915
forebrain.protruding	0.0653355	0.106745
fourth.ventricle.opaque	0.0642577	0.10978
liver.quality	0.0601698	0.122151
forebrain.increased.size	0.0601321	0.122272
gut.hypoplastic	0.0596203	0.123924
yolk.circular	0.0566076	0.134148
protein.kinase.B.signaling.decreased.occurrence	0.0565397	0.134388
ribosomal.protein.S6.kinase.activity.increased.occurrence	0.0565397	0.134388
optic.tectum.increased.size	0.0552095	0.139197
gut.quality	0.0550081	0.139941
hindbrain.morphology	0.052777	0.14848
whole.organism.decreased.size	0.0504277	0.158089
otic.placode.decreased.size	0.0489681	0.164402
liver.hypoplastic	0.0485744	0.166152
anatomical.system.quality	0.0475269	0.170909
yolk.quality	0.0475269	0.170909
nervous.system.quality	0.0438365	0.188917
nucleate.erythrocyte.decreased.amount	0.0429823	0.193382
yolk.grey	0.0419612	0.198878
otic.placode.shape	0.0407554	0.205598
central.nervous.system.necrotic	0.0395613	0.212508
head.apoptotic.process.increased.occurrence	0.0377832	0.2233
post.vent.region.morphology	0.0368636	0.229131
whole.organism.decreased.length	0.0347084	0.243506
whole.organism.viability	0.0333762	0.252925
trunk.bent	0.0308241	0.272216
fin.deformed	0.018285	0.399257
midbrain.hindbrain.boundary.quality	0.0140669	0.460172
pericardium.edematous	0.0102673	0.52845
midbrain.hindbrain.boundary.condensed	0.0094739	0.544908
trunk.decreased.thickness	0.00815883	0.574365
hindbrain.quality	0.00689473	0.605763
extension.decreased.thickness	0.00672571	0.610231
angiogenesis.disrupted	0.0066791	0.611476
dorsal.aorta.morphology	0.0066791	0.611476
hematopoietic.stem.cell.differentiation.disrupted	0.0066791	0.611476
intersegmental.vessel.aplastic	0.0066791	0.611476
thymus.primordium.common.lymphoid.progenitor.absent	0.0066791	0.611476
vasculogenesis.disrupted	0.0066791	0.611476
ventral.wall.of.dorsal.aorta.hematopoietic.stem.cell.absent	0.0066791	0.611476
whole.organism.shape	0.00600594	0.630084
cerebellum.aplastic	0.0053593	0.649203
primitive.hemopoiesis.disrupted	0.00526945	0.651968
notochord.bent	0.00513015	0.65631
trunk.atrophied	0.00508992	0.657577
peripheral.nervous.system.nerve.neoplastic	0.0049657	0.661528
ball.deformed	0.00485456	0.665113
fourth.ventricle.distended	0.00457548	0.674333
brain.quality	0.00427145	0.684759
blood.cell.hemoglobin.complex.decreased.amount	0.00420512	0.687091
caudal.fin.apoptotic.process.increased.process.quality	0.00420512	0.687091
cell.cycle.disrupted	0.00420512	0.687091
embryonic.hemopoiesis.decreased.process.quality	0.00420512	0.687091
hemopoiesis.decreased.process.quality	0.00420512	0.687091
hindbrain.inflated	0.00420512	0.687091
nucleate.erythrocyte.autophagy.increased.occurrence	0.00420512	0.687091
nucleate.erythrocyte.has.extra.parts.of.type.nucleate.erythrocyte.autolysosome	0.00420512	0.687091
nucleate.erythrocyte.has.extra.parts.of.type.nucleate.erythrocyte.autophagosome	0.00420512	0.687091
whole.organism.anterior.region.necrotic	0.00420512	0.687091
whole.organism.autophagy.increased.occurrence	0.00420512	0.687091
whole.organism.Golgi.apparatus.morphology	0.00420512	0.687091
whole.organism.has.fewer.parts.of.type.nucleate.erythrocyte	0.00420512	0.687091
whole.organism.mitochondrion.morphology	0.00420512	0.687091
lens.increased.size	0.00392989	0.696999
testis.seminoma.present	0.00378614	0.702333
whole.organism.Lymphoid.neoplasms.neoplastic.malignant	0.00378614	0.702333
trunk.curved.dorsal	0.00348588	0.713859
peripheral.nervous.system.chromosome.am	0.00338133	0.718004
yolk.non.functional	0.00337536	0.718243
extension.decreased.length	0.003319	0.720509
swim.bladder.inflation.disrupted	0.00329004	0.721682
swim.bladder.quality	0.00329004	0.721682
heart.quality	0.00284634	0.740429
fourth.ventricle.edematous	0.0026727	0.748205
trunk.curved.ventral	0.00211935	0.775022
trunk.degenerate	0.00211935	0.775022
yolk.syncytial.layer.decreased.thickness	0.00211935	0.775022
peripheral.nervous.system.chromosome.amount	0.00174184	0.79557
blood.circulation.disrupted	0.00161326	0.803105
cell.death.increased.occurrence	0.00161326	0.803105
convergent.extension.involved.in.gastrulation.disrupted	0.00161326	0.803105
establishment.of.cell.polarity.disrupted	0.00161326	0.803105
establishment.of.mitotic.spindle.orientation.disrupted	0.00161326	0.803105
intersegmental.vessel.decreased.functionality	0.00161326	0.803105
notochord.increased.width	0.00161326	0.803105
somite.increased.width	0.00161326	0.803105
whole.organism.curved.ventral	0.00161326	0.803105
telencephalon.decreased.size	0.00159305	0.804317
head.decreased.size	0.00158898	0.804563
extension.deformed	0.00152782	0.808289
eye.decreased.size	0.00143417	0.814151
trunk.decreased.length	0.00128085	0.824201
exocrine.pancreas.decreased.size	0.000993463	0.844901
exocrine.pancreas.development.disrupted	0.000993463	0.844901
whole.organism.edematous	0.000985173	0.845541
erythrocyte.differentiation.disrupted	0.000893853	0.852792
yolk.swollen	0.000829595	0.858126
pancreas.decreased.volume	0.000764547	0.863747
pancreas.development.delayed	0.000764547	0.863747
pancreas.morphogenesis.disrupted	0.000764547	0.863747
notochord.undulate	0.000760985	0.864062
telencephalon.morphology	0.000489148	0.890831
midbrain.hindbrain.boundary.decreased.thickness	0.000460641	0.894041
brain.malformed	0.000422551	0.898493
eye.color	0.000234235	0.924336
head.circular	0.000174276	0.934711
pancreas.hypoplastic	0.000174276	0.934711
brain.aplastic	0.000150124	0.939394
forebrain.apoptotic.process.increased.process.quality	0.000131404	0.943292
head.cytosolic.ribosome.increased.amount	0.000131404	0.943292
head.polysome.decreased.amount	0.000131404	0.943292
hindbrain.apoptotic.process.increased.process.quality	0.000131404	0.943292
brain.morphogenesis.disrupted	9.54902e-05	0.951648
midbrain.aplastic	8.93504e-05	0.953227
definitive.hemopoiesis.disrupted	7.09602e-05	0.958312
embryo.development.disrupted	7.09602e-05	0.958312
embryonic.cranial.skeleton.morphogenesis.decreased.process.quality	7.09602e-05	0.958312
embryonic.neurocranium.morphogenesis.decreased.process.quality	7.09602e-05	0.958312
fourth.ventricle.morphology	7.09602e-05	0.958312
heart.nucleate.erythrocyte.decreased.amount	7.09602e-05	0.958312
mandibular.arch.skeleton.malformed	7.09602e-05	0.958312
neurocranium.malformed	7.09602e-05	0.958312
optic.tectum.morphology	7.09602e-05	0.958312
embryo.development.process.quality	6.87728e-05	0.958959
extension.yolk.absent	6.87728e-05	0.958959
ventricular.system.increased.size	6.87728e-05	0.958959
trunk.increased.width	5.3959e-05	0.963644
head.flat	5.074e-05	0.964744
lens.decreased.size	4.44658e-05	0.966995
telencephalon.hypoplastic	4.32515e-05	0.967448
trunk.necrotic	3.32397e-05	0.971462
trunk.undulate	2.93749e-05	0.973171
embryo.development.delayed	2.61754e-05	0.974674
fin.decreased.thickness	1.22538e-05	0.98267
fourth.ventricle.decreased.size	1.22538e-05	0.98267
head.protruding	5.77356e-06	0.988104
otolith.organ.deformed	3.77556e-06	0.99038
ball.opaque	5.66871e-07	0.996272

## Sheet: fish_Dim3
	R2	p.value
blood.cell.hemoglobin.complex.decreased.amount	0.750301	2.58322e-13
caudal.fin.apoptotic.process.increased.process.quality	0.750301	2.58322e-13
cell.cycle.disrupted	0.750301	2.58322e-13
embryonic.hemopoiesis.decreased.process.quality	0.750301	2.58322e-13
hemopoiesis.decreased.process.quality	0.750301	2.58322e-13
hindbrain.inflated	0.750301	2.58322e-13
nucleate.erythrocyte.autophagy.increased.occurrence	0.750301	2.58322e-13
nucleate.erythrocyte.has.extra.parts.of.type.nucleate.erythrocyte.autolysosome	0.750301	2.58322e-13
nucleate.erythrocyte.has.extra.parts.of.type.nucleate.erythrocyte.autophagosome	0.750301	2.58322e-13
whole.organism.anterior.region.necrotic	0.750301	2.58322e-13
whole.organism.autophagy.increased.occurrence	0.750301	2.58322e-13
whole.organism.Golgi.apparatus.morphology	0.750301	2.58322e-13
whole.organism.has.fewer.parts.of.type.nucleate.erythrocyte	0.750301	2.58322e-13
whole.organism.mitochondrion.morphology	0.750301	2.58322e-13
fourth.ventricle.edematous	0.411839	6.12907e-06
brain.apoptotic	0.350368	4.57607e-05
trunk.decreased.length	0.343672	5.63695e-05
protein.kinase.B.signaling.decreased.occurrence	0.257414	0.000710003
ribosomal.protein.S6.kinase.activity.increased.occurrence	0.257414	0.000710003
heart.edematous	0.249168	0.0008929
primitive.hemopoiesis.disrupted	0.202628	0.0031464
optic.tectum.increased.size	0.182448	0.00534801
extension.decreased.length	0.172442	0.00693691
otic.placode.decreased.size	0.165749	0.00824728
optic.tectum.opaque	0.161649	0.00916625
retina.decreased.size	0.1577	0.0101458
cerebellum.aplastic	0.150103	0.0123267
midbrain.hindbrain.boundary.aplastic	0.146459	0.0135299
fourth.ventricle.opaque	0.145218	0.0139654
ball.increased.size	0.142511	0.0149636
hindbrain.undulate	0.131111	0.0199979
angiogenesis.disrupted	0.127219	0.0220743
dorsal.aorta.morphology	0.127219	0.0220743
hematopoietic.stem.cell.differentiation.disrupted	0.127219	0.0220743
intersegmental.vessel.aplastic	0.127219	0.0220743
thymus.primordium.common.lymphoid.progenitor.absent	0.127219	0.0220743
vasculogenesis.disrupted	0.127219	0.0220743
ventral.wall.of.dorsal.aorta.hematopoietic.stem.cell.absent	0.127219	0.0220743
ball.deformed	0.121527	0.0255003
notochord.bent	0.10551	0.038254
whole.organism.decreased.size	0.104129	0.0396154
extension.deformed	0.099027	0.0450819
peripheral.nervous.system.nerve.neoplastic	0.0972257	0.0471886
lens.increased.size	0.0932752	0.0521642
fin.aplastic	0.0892309	0.0578107
whole.organism.decreased.length	0.0876364	0.0602046
definitive.hemopoiesis.disrupted	0.0685676	0.0981616
embryo.development.disrupted	0.0685676	0.0981616
embryonic.cranial.skeleton.morphogenesis.decreased.process.quality	0.0685676	0.0981616
embryonic.neurocranium.morphogenesis.decreased.process.quality	0.0685676	0.0981616
fourth.ventricle.morphology	0.0685676	0.0981616
heart.nucleate.erythrocyte.decreased.amount	0.0685676	0.0981616
mandibular.arch.skeleton.malformed	0.0685676	0.0981616
neurocranium.malformed	0.0685676	0.0981616
optic.tectum.morphology	0.0685676	0.0981616
fourth.ventricle.increased.size	0.0676832	0.100436
peripheral.nervous.system.chromosome.am	0.0668233	0.1027
otic.placode.aplastic	0.0620099	0.116408
lens.decreased.size	0.0612828	0.118642
erythrocyte.development.disrupted	0.0545867	0.141512
forebrain.morphology	0.0545867	0.141512
nucleate.erythrocyte.hemoglobin.complex.decreased.amount	0.0545867	0.141512
peripheral.nervous.system.chromosome.amount	0.0475724	0.170699
hindbrain.morphology	0.0466114	0.175191
fin.deformed	0.0457442	0.179357
pericardium.edematous	0.0438673	0.188758
yolk.grey	0.0392823	0.214161
brain.morphogenesis.disrupted	0.0374472	0.22541
midbrain.hindbrain.boundary.condensed	0.0310818	0.27019
trunk.necrotic	0.0282539	0.293485
brain.malformed	0.0264815	0.309362
whole.organism.viability	0.0260228	0.313647
head.apoptotic.process.increased.occurrence	0.0258701	0.31509
yolk.circular	0.0245321	0.328103
central.nervous.system.necrotic	0.0242845	0.330587
gut.hypoplastic	0.0241962	0.331479
liver.hypoplastic	0.0229922	0.343955
eye.decreased.size	0.0226652	0.34745
post.vent.region.morphology	0.0205253	0.371533
fourth.ventricle.distended	0.0202819	0.374413
trunk.decreased.thickness	0.018333	0.398634
trunk.bent	0.0162064	0.427678
midbrain.aplastic	0.0153679	0.439986
midbrain.hindbrain.boundary.morphology	0.0147149	0.449946
telencephalon.morphology	0.0143966	0.454925
telencephalon.hypoplastic	0.0130896	0.476298
telencephalon.decreased.size	0.0122702	0.490526
brain.necrotic	0.0122572	0.490758
forebrain.protruding	0.0121565	0.492556
head.decreased.size	0.0115752	0.503148
blood.apoptotic.process.increased.process.quality	0.0107426	0.519006
brain.segmentation.disrupted	0.0107426	0.519006
caudal.fin.curved	0.0107426	0.519006
cranial.cartilage.malformed	0.0107426	0.519006
cranium.edematous	0.0107426	0.519006
digestive.system.position	0.0107426	0.519006
embryo.development.arrested	0.0107426	0.519006
erythrocyte.differentiation.decreased.occurrence	0.0107426	0.519006
eye.aplastic	0.0107426	0.519006
eye.hypoplastic	0.0107426	0.519006
eye.immature	0.0107426	0.519006
forebrain.aplastic	0.0107426	0.519006
forebrain.decreased.size	0.0107426	0.519006
heart.primordium.position	0.0107426	0.519006
hematopoietic.stem.cell.decreased.amount	0.0107426	0.519006
intermediate.cell.mass.of.mesoderm.erythroblast.increased.amount	0.0107426	0.519006
lens.absent	0.0107426	0.519006
nucleate.erythrocyte.apoptotic	0.0107426	0.519006
optic.primordium.decreased.size	0.0107426	0.519006
optic.tectum.aplastic	0.0107426	0.519006
otic.vesicle.decreased.size	0.0107426	0.519006
pharyngeal.arch.3.7.immature	0.0107426	0.519006
thymus.T.cell.decreased.amount	0.0107426	0.519006
whole.organism.anterior.posterior.axis.curved	0.0107426	0.519006
whole.organism.apoptotic	0.0107426	0.519006
whole.organism.morphology	0.0107426	0.519006
whole.organism.ribosome.decreased.amount	0.0107426	0.519006
head.circular	0.0106643	0.520542
pancreas.hypoplastic	0.0106643	0.520542
notochord.undulate	0.0106429	0.520963
forebrain.increased.size	0.0104716	0.524355
otic.placode.shape	0.008388	0.569017
brain.aplastic	0.00834426	0.57003
fin.decreased.thickness	0.00818029	0.57386
fourth.ventricle.decreased.size	0.00818029	0.57386
head.apoptotic.process.increased.process.quality	0.00681598	0.607836
midbrain.hindbrain.boundary.quality	0.00670248	0.610851
trunk.undulate	0.00589582	0.633248
heart.quality	0.00542164	0.647301
trunk.curved.ventral	0.00518651	0.654545
trunk.degenerate	0.00518651	0.654545
yolk.syncytial.layer.decreased.thickness	0.00518651	0.654545
cerebellum.decreased.thickness	0.00505258	0.658759
hindbrain.opaque	0.00470236	0.670101
trunk.curved.dorsal	0.00462229	0.672763
otolith.organ.deformed	0.00447459	0.677746
pancreas.decreased.volume	0.00442644	0.679392
pancreas.development.delayed	0.00442644	0.679392
pancreas.morphogenesis.disrupted	0.00442644	0.679392
apoptotic.process.increased	0.0044063	0.680083
ball.opaque	0.00404165	0.692929
anatomical.system.quality	0.00349189	0.713623
yolk.quality	0.00349189	0.713623
liver.quality	0.00311811	0.728768
whole.organism.edematous	0.00294847	0.735978
trunk.atrophied	0.00277429	0.743623
swim.bladder.inflation.disrupted	0.00227491	0.767133
swim.bladder.quality	0.00227491	0.767133
embryo.development.delayed	0.00219319	0.771239
head.protruding	0.00216957	0.772442
erythroid.lineage.cell.absent	0.00210167	0.775938
hemoglobin.biosynthetic.process.decreased.process.quality	0.00210167	0.775938
hemopoiesis.process.quality	0.00210167	0.775938
whole.organism.decreased.life.span	0.00210167	0.775938
gut.quality	0.00205272	0.778497
brain.quality	0.00199787	0.781403
head.flat	0.00180597	0.791922
otolith.organ.decreased.size	0.00167014	0.799734
brain.structure	0.00157046	0.805683
caudal.fin.shortened	0.00157046	0.805683
cell.aging.decreased.magnitude	0.00157046	0.805683
cell.population.proliferation.decreased.occurrence	0.00157046	0.805683
common.cardinal.vein.circulating.cell.decreased.amount	0.00157046	0.805683
erythroid.lineage.cell.decreased.amount	0.00157046	0.805683
erythroid.lineage.cell.increased.size	0.00157046	0.805683
extension.decreased.size	0.00157046	0.805683
extension.morphology	0.00157046	0.805683
eye.pigmentation.delayed	0.00157046	0.805683
gut.absent	0.00157046	0.805683
gut.aplastic	0.00157046	0.805683
gut.immature	0.00157046	0.805683
head.aplastic	0.00157046	0.805683
head.opaque	0.00157046	0.805683
inner.ear.morphology	0.00157046	0.805683
intermediate.cell.mass.of.mesoderm.cell.population.proliferation.decreased.occurrence	0.00157046	0.805683
intermediate.cell.mass.of.mesoderm.hematopoietic.multipotent.progenitor.cell.decreased.amount	0.00157046	0.805683
liver.absent	0.00157046	0.805683
liver.immature	0.00157046	0.805683
midbrain.hindbrain.boundary.structural.organization.disrupted	0.00157046	0.805683
mouth.absent	0.00157046	0.805683
nucleate.erythrocyte.increased.size	0.00157046	0.805683
nucleate.erythrocyte.irregularly.shaped	0.00157046	0.805683
nucleate.erythrocyte.maturation.disrupted	0.00157046	0.805683
otolith.deformed	0.00157046	0.805683
regulation.of.glucose.metabolic.process.disrupted	0.00157046	0.805683
regulation.of.transcription.DNA.templated.disrupted	0.00157046	0.805683
swim.bladder.absent	0.00157046	0.805683
whole.organism.decreased.pigmentation	0.00157046	0.805683
whole.organism.polysome.decreased.amount	0.00157046	0.805683
testis.seminoma.present	0.00148404	0.811005
whole.organism.Lymphoid.neoplasms.neoplastic.malignant	0.00148404	0.811005
extension.decreased.thickness	0.00144522	0.813449
tegmentum.opaque	0.00118547	0.830774
nervous.system.quality	0.00105546	0.840195
nucleate.erythrocyte.decreased.amount	0.00102651	0.842374
trunk.increased.width	0.000897074	0.85253
exocrine.pancreas.decreased.size	0.000728132	0.867001
exocrine.pancreas.development.disrupted	0.000728132	0.867001
yolk.non.functional	0.000580606	0.881129
yolk.edematous	0.000579315	0.88126
whole.organism.shape	0.000537684	0.885577
trunk.curved	0.000513031	0.888214
yolk.swollen	0.000421633	0.898602
embryo.development.process.quality	0.000306889	0.913432
extension.yolk.absent	0.000306889	0.913432
ventricular.system.increased.size	0.000306889	0.913432
hindbrain.quality	0.000186391	0.932485
forebrain.apoptotic.process.increased.process.quality	0.000135503	0.942416
head.cytosolic.ribosome.increased.amount	0.000135503	0.942416
head.polysome.decreased.amount	0.000135503	0.942416
hindbrain.apoptotic.process.increased.process.quality	0.000135503	0.942416
midbrain.hindbrain.boundary.decreased.thickness	5.11048e-05	0.964618
blood.circulation.disrupted	3.62228e-05	0.970209
cell.death.increased.occurrence	3.62228e-05	0.970209
convergent.extension.involved.in.gastrulation.disrupted	3.62228e-05	0.970209
establishment.of.cell.polarity.disrupted	3.62228e-05	0.970209
establishment.of.mitotic.spindle.orientation.disrupted	3.62228e-05	0.970209
intersegmental.vessel.decreased.functionality	3.62228e-05	0.970209
notochord.increased.width	3.62228e-05	0.970209
somite.increased.width	3.62228e-05	0.970209
whole.organism.curved.ventral	3.62228e-05	0.970209
eye.color	1.88078e-05	0.978531
erythrocyte.differentiation.disrupted	6.41192e-06	0.987464

## Sheet: fish_Dim4
	R2	p.value
angiogenesis.disrupted	0.630874	5.72226e-10
dorsal.aorta.morphology	0.630874	5.72226e-10
hematopoietic.stem.cell.differentiation.disrupted	0.630874	5.72226e-10
intersegmental.vessel.aplastic	0.630874	5.72226e-10
thymus.primordium.common.lymphoid.progenitor.absent	0.630874	5.72226e-10
vasculogenesis.disrupted	0.630874	5.72226e-10
ventral.wall.of.dorsal.aorta.hematopoietic.stem.cell.absent	0.630874	5.72226e-10
notochord.bent	0.500082	2.35822e-07
primitive.hemopoiesis.disrupted	0.493775	3.02881e-07
lens.increased.size	0.461773	1.03188e-06
ball.deformed	0.446777	1.78998e-06
erythrocyte.development.disrupted	0.345743	5.28605e-05
forebrain.morphology	0.345743	5.28605e-05
nucleate.erythrocyte.hemoglobin.complex.decreased.amount	0.345743	5.28605e-05
peripheral.nervous.system.chromosome.am	0.321845	0.000109807
apoptotic.process.increased	0.294278	0.000248328
extension.decreased.length	0.252223	0.000820405
cerebellum.aplastic	0.243356	0.00104825
otic.placode.aplastic	0.221065	0.00192281
extension.deformed	0.22037	0.00195915
hindbrain.undulate	0.216594	0.00216832
ball.increased.size	0.209998	0.00258661
fin.aplastic	0.199377	0.0034291
nucleate.erythrocyte.decreased.amount	0.198091	0.00354755
trunk.necrotic	0.197709	0.00358352
post.vent.region.morphology	0.196978	0.00365331
trunk.decreased.thickness	0.194991	0.00384967
optic.tectum.opaque	0.192776	0.00408075
retina.decreased.size	0.182748	0.0053063
whole.organism.viability	0.173445	0.00675892
midbrain.hindbrain.boundary.aplastic	0.172762	0.00687954
fourth.ventricle.increased.size	0.167727	0.00783672
central.nervous.system.necrotic	0.165846	0.00822672
blood.cell.hemoglobin.complex.decreased.amount	0.161281	0.00925353
caudal.fin.apoptotic.process.increased.process.quality	0.161281	0.00925353
cell.cycle.disrupted	0.161281	0.00925353
embryonic.hemopoiesis.decreased.process.quality	0.161281	0.00925353
hemopoiesis.decreased.process.quality	0.161281	0.00925353
hindbrain.inflated	0.161281	0.00925353
nucleate.erythrocyte.autophagy.increased.occurrence	0.161281	0.00925353
nucleate.erythrocyte.has.extra.parts.of.type.nucleate.erythrocyte.autolysosome	0.161281	0.00925353
nucleate.erythrocyte.has.extra.parts.of.type.nucleate.erythrocyte.autophagosome	0.161281	0.00925353
whole.organism.anterior.region.necrotic	0.161281	0.00925353
whole.organism.autophagy.increased.occurrence	0.161281	0.00925353
whole.organism.Golgi.apparatus.morphology	0.161281	0.00925353
whole.organism.has.fewer.parts.of.type.nucleate.erythrocyte	0.161281	0.00925353
whole.organism.mitochondrion.morphology	0.161281	0.00925353
peripheral.nervous.system.chromosome.amount	0.156048	0.0105852
optic.tectum.increased.size	0.15038	0.0122397
otic.placode.decreased.size	0.14993	0.0123814
fourth.ventricle.opaque	0.147828	0.0130649
midbrain.hindbrain.boundary.condensed	0.145539	0.0138515
yolk.grey	0.130544	0.0202882
fourth.ventricle.edematous	0.122168	0.0250897
liver.hypoplastic	0.100013	0.043969
yolk.circular	0.0914549	0.0546328
eye.decreased.size	0.0893096	0.0576951
pericardium.edematous	0.0875271	0.0603723
extension.decreased.thickness	0.0830335	0.0676993
trunk.decreased.length	0.0803423	0.0725181
head.decreased.size	0.0768622	0.0792784
gut.hypoplastic	0.0749889	0.0831843
fourth.ventricle.distended	0.0727584	0.0880965
blood.circulation.disrupted	0.0697916	0.0951034
cell.death.increased.occurrence	0.0697916	0.0951034
convergent.extension.involved.in.gastrulation.disrupted	0.0697916	0.0951034
establishment.of.cell.polarity.disrupted	0.0697916	0.0951034
establishment.of.mitotic.spindle.orientation.disrupted	0.0697916	0.0951034
intersegmental.vessel.decreased.functionality	0.0697916	0.0951034
notochord.increased.width	0.0697916	0.0951034
somite.increased.width	0.0697916	0.0951034
whole.organism.curved.ventral	0.0697916	0.0951034
protein.kinase.B.signaling.decreased.occurrence	0.0691778	0.0966242
ribosomal.protein.S6.kinase.activity.increased.occurrence	0.0691778	0.0966242
brain.apoptotic	0.0655549	0.106138
yolk.edematous	0.0487251	0.16548
head.apoptotic.process.increased.process.quality	0.0369337	0.22868
heart.edematous	0.0289943	0.287155
liver.quality	0.0231614	0.342165
forebrain.apoptotic.process.increased.process.quality	0.0230669	0.343164
head.cytosolic.ribosome.increased.amount	0.0230669	0.343164
head.polysome.decreased.amount	0.0230669	0.343164
hindbrain.apoptotic.process.increased.process.quality	0.0230669	0.343164
gut.quality	0.0226284	0.347846
midbrain.hindbrain.boundary.quality	0.0219374	0.3554
notochord.undulate	0.0206418	0.370165
erythrocyte.differentiation.disrupted	0.0198028	0.380174
peripheral.nervous.system.nerve.neoplastic	0.0165823	0.422325
blood.apoptotic.process.increased.process.quality	0.0135697	0.468267
brain.segmentation.disrupted	0.0135697	0.468267
caudal.fin.curved	0.0135697	0.468267
cranial.cartilage.malformed	0.0135697	0.468267
cranium.edematous	0.0135697	0.468267
digestive.system.position	0.0135697	0.468267
embryo.development.arrested	0.0135697	0.468267
erythrocyte.differentiation.decreased.occurrence	0.0135697	0.468267
eye.aplastic	0.0135697	0.468267
eye.hypoplastic	0.0135697	0.468267
eye.immature	0.0135697	0.468267
forebrain.aplastic	0.0135697	0.468267
forebrain.decreased.size	0.0135697	0.468267
heart.primordium.position	0.0135697	0.468267
hematopoietic.stem.cell.decreased.amount	0.0135697	0.468267
intermediate.cell.mass.of.mesoderm.erythroblast.increased.amount	0.0135697	0.468267
lens.absent	0.0135697	0.468267
nucleate.erythrocyte.apoptotic	0.0135697	0.468267
optic.primordium.decreased.size	0.0135697	0.468267
optic.tectum.aplastic	0.0135697	0.468267
otic.vesicle.decreased.size	0.0135697	0.468267
pharyngeal.arch.3.7.immature	0.0135697	0.468267
thymus.T.cell.decreased.amount	0.0135697	0.468267
whole.organism.anterior.posterior.axis.curved	0.0135697	0.468267
whole.organism.apoptotic	0.0135697	0.468267
whole.organism.morphology	0.0135697	0.468267
whole.organism.ribosome.decreased.amount	0.0135697	0.468267
erythroid.lineage.cell.absent	0.0132188	0.474115
hemoglobin.biosynthetic.process.decreased.process.quality	0.0132188	0.474115
hemopoiesis.process.quality	0.0132188	0.474115
whole.organism.decreased.life.span	0.0132188	0.474115
yolk.non.functional	0.0131741	0.474869
swim.bladder.inflation.disrupted	0.0113924	0.506559
swim.bladder.quality	0.0113924	0.506559
ball.opaque	0.0108189	0.517517
whole.organism.decreased.size	0.00994514	0.535024
trunk.increased.width	0.00748008	0.590803
trunk.curved.dorsal	0.00714545	0.59926
brain.necrotic	0.00676312	0.609236
trunk.atrophied	0.0062238	0.623927
exocrine.pancreas.decreased.size	0.00602958	0.629409
exocrine.pancreas.development.disrupted	0.00602958	0.629409
definitive.hemopoiesis.disrupted	0.00594973	0.631695
embryo.development.disrupted	0.00594973	0.631695
embryonic.cranial.skeleton.morphogenesis.decreased.process.quality	0.00594973	0.631695
embryonic.neurocranium.morphogenesis.decreased.process.quality	0.00594973	0.631695
fourth.ventricle.morphology	0.00594973	0.631695
heart.nucleate.erythrocyte.decreased.amount	0.00594973	0.631695
mandibular.arch.skeleton.malformed	0.00594973	0.631695
neurocranium.malformed	0.00594973	0.631695
optic.tectum.morphology	0.00594973	0.631695
yolk.swollen	0.00592444	0.632423
brain.malformed	0.00561717	0.64142
trunk.curved.ventral	0.00540165	0.647909
trunk.degenerate	0.00540165	0.647909
yolk.syncytial.layer.decreased.thickness	0.00540165	0.647909
otolith.organ.decreased.size	0.00510923	0.656968
head.apoptotic.process.increased.occurrence	0.00501562	0.659933
embryo.development.delayed	0.00487788	0.664356
telencephalon.morphology	0.00452953	0.675882
otolith.organ.deformed	0.00383847	0.700378
testis.seminoma.present	0.00310741	0.729217
whole.organism.Lymphoid.neoplasms.neoplastic.malignant	0.00310741	0.729217
lens.decreased.size	0.00298133	0.734563
forebrain.protruding	0.00279274	0.742801
otic.placode.shape	0.00236617	0.76264
pancreas.decreased.volume	0.00222122	0.769822
pancreas.development.delayed	0.00222122	0.769822
pancreas.morphogenesis.disrupted	0.00222122	0.769822
heart.quality	0.00214767	0.773563
brain.structure	0.00194148	0.784435
caudal.fin.shortened	0.00194148	0.784435
cell.aging.decreased.magnitude	0.00194148	0.784435
cell.population.proliferation.decreased.occurrence	0.00194148	0.784435
common.cardinal.vein.circulating.cell.decreased.amount	0.00194148	0.784435
erythroid.lineage.cell.decreased.amount	0.00194148	0.784435
erythroid.lineage.cell.increased.size	0.00194148	0.784435
extension.decreased.size	0.00194148	0.784435
extension.morphology	0.00194148	0.784435
eye.pigmentation.delayed	0.00194148	0.784435
gut.absent	0.00194148	0.784435
gut.aplastic	0.00194148	0.784435
gut.immature	0.00194148	0.784435
head.aplastic	0.00194148	0.784435
head.opaque	0.00194148	0.784435
inner.ear.morphology	0.00194148	0.784435
intermediate.cell.mass.of.mesoderm.cell.population.proliferation.decreased.occurrence	0.00194148	0.784435
intermediate.cell.mass.of.mesoderm.hematopoietic.multipotent.progenitor.cell.decreased.amount	0.00194148	0.784435
liver.absent	0.00194148	0.784435
liver.immature	0.00194148	0.784435
midbrain.hindbrain.boundary.structural.organization.disrupted	0.00194148	0.784435
mouth.absent	0.00194148	0.784435
nucleate.erythrocyte.increased.size	0.00194148	0.784435
nucleate.erythrocyte.irregularly.shaped	0.00194148	0.784435
nucleate.erythrocyte.maturation.disrupted	0.00194148	0.784435
otolith.deformed	0.00194148	0.784435
regulation.of.glucose.metabolic.process.disrupted	0.00194148	0.784435
regulation.of.transcription.DNA.templated.disrupted	0.00194148	0.784435
swim.bladder.absent	0.00194148	0.784435
whole.organism.decreased.pigmentation	0.00194148	0.784435
whole.organism.polysome.decreased.amount	0.00194148	0.784435
anatomical.system.quality	0.00176234	0.794396
yolk.quality	0.00176234	0.794396
head.flat	0.0015053	0.809681
whole.organism.edematous	0.00145279	0.81297
embryo.development.process.quality	0.00144767	0.813294
extension.yolk.absent	0.00144767	0.813294
ventricular.system.increased.size	0.00144767	0.813294
trunk.bent	0.00138478	0.817324
whole.organism.shape	0.00133426	0.820632
telencephalon.hypoplastic	0.00126298	0.825412
telencephalon.decreased.size	0.00117446	0.83155
head.circular	0.00111478	0.835825
pancreas.hypoplastic	0.00111478	0.835825
cerebellum.decreased.thickness	0.00105232	0.84043
trunk.curved	0.000947898	0.848457
fin.deformed	0.000940125	0.849072
trunk.undulate	0.000845654	0.856773
nervous.system.quality	0.000614838	0.8777
hindbrain.morphology	0.000560908	0.883148
hindbrain.opaque	0.00039836	0.901426
brain.morphogenesis.disrupted	0.000372633	0.904647
fin.decreased.thickness	0.000371208	0.904829
fourth.ventricle.decreased.size	0.000371208	0.904829
tegmentum.opaque	0.000348481	0.907776
head.protruding	0.000278027	0.917589
midbrain.hindbrain.boundary.morphology	0.000180491	0.933559
brain.aplastic	0.000180362	0.933583
forebrain.increased.size	5.84263e-05	0.96217
eye.color	5.29067e-05	0.964
midbrain.hindbrain.boundary.decreased.thickness	4.43324e-05	0.967044
midbrain.aplastic	2.08293e-05	0.977407
brain.quality	1.80685e-05	0.978957
whole.organism.decreased.length	1.10372e-06	0.994799
hindbrain.quality	7.60438e-07	0.995683

## Sheet: fish_Dim5
	R2	p.value
definitive.hemopoiesis.disrupted	0.653453	1.64407e-10
embryo.development.disrupted	0.653453	1.64407e-10
embryonic.cranial.skeleton.morphogenesis.decreased.process.quality	0.653453	1.64407e-10
embryonic.neurocranium.morphogenesis.decreased.process.quality	0.653453	1.64407e-10
fourth.ventricle.morphology	0.653453	1.64407e-10
heart.nucleate.erythrocyte.decreased.amount	0.653453	1.64407e-10
mandibular.arch.skeleton.malformed	0.653453	1.64407e-10
neurocranium.malformed	0.653453	1.64407e-10
optic.tectum.morphology	0.653453	1.64407e-10
brain.morphogenesis.disrupted	0.420979	4.47179e-06
brain.malformed	0.329282	8.76771e-05
hindbrain.morphology	0.312451	0.000145468
eye.decreased.size	0.266278	0.000553683
head.apoptotic.process.increased.occurrence	0.266101	0.000556454
lens.decreased.size	0.262931	0.000608371
yolk.circular	0.26224	0.000620284
gut.hypoplastic	0.205977	0.00287881
midbrain.hindbrain.boundary.morphology	0.178981	0.00585369
central.nervous.system.necrotic	0.163624	0.00871174
yolk.grey	0.160682	0.00939729
fin.deformed	0.145251	0.0139536
midbrain.hindbrain.boundary.condensed	0.144346	0.0142794
fourth.ventricle.distended	0.143426	0.0146188
liver.hypoplastic	0.1411	0.0155117
midbrain.hindbrain.boundary.quality	0.138315	0.0166515
trunk.decreased.thickness	0.1298	0.0206751
extension.decreased.thickness	0.121482	0.0255299
gut.quality	0.114595	0.0303946
post.vent.region.morphology	0.111254	0.0330771
whole.organism.viability	0.10415	0.039594
apoptotic.process.increased	0.0963425	0.0482576
liver.quality	0.0912055	0.0549801
retina.decreased.size	0.0836683	0.0666113
primitive.hemopoiesis.disrupted	0.0827756	0.0681465
pericardium.edematous	0.0781109	0.0767809
optic.tectum.opaque	0.0777577	0.077479
midbrain.hindbrain.boundary.aplastic	0.0776879	0.0776177
head.decreased.size	0.0731147	0.0872921
nucleate.erythrocyte.decreased.amount	0.0718184	0.0902563
cerebellum.aplastic	0.0676656	0.100482
whole.organism.shape	0.0653449	0.106719
hindbrain.undulate	0.0643887	0.109406
hindbrain.quality	0.0620859	0.116178
trunk.necrotic	0.0616251	0.117585
anatomical.system.quality	0.0591737	0.125385
yolk.quality	0.0591737	0.125385
trunk.atrophied	0.0590842	0.12568
brain.quality	0.0580592	0.129113
blood.cell.hemoglobin.complex.decreased.amount	0.0571323	0.132304
caudal.fin.apoptotic.process.increased.process.quality	0.0571323	0.132304
cell.cycle.disrupted	0.0571323	0.132304
embryonic.hemopoiesis.decreased.process.quality	0.0571323	0.132304
hemopoiesis.decreased.process.quality	0.0571323	0.132304
hindbrain.inflated	0.0571323	0.132304
nucleate.erythrocyte.autophagy.increased.occurrence	0.0571323	0.132304
nucleate.erythrocyte.has.extra.parts.of.type.nucleate.erythrocyte.autolysosome	0.0571323	0.132304
nucleate.erythrocyte.has.extra.parts.of.type.nucleate.erythrocyte.autophagosome	0.0571323	0.132304
whole.organism.anterior.region.necrotic	0.0571323	0.132304
whole.organism.autophagy.increased.occurrence	0.0571323	0.132304
whole.organism.Golgi.apparatus.morphology	0.0571323	0.132304
whole.organism.has.fewer.parts.of.type.nucleate.erythrocyte	0.0571323	0.132304
whole.organism.mitochondrion.morphology	0.0571323	0.132304
nervous.system.quality	0.0568275	0.133371
otic.placode.decreased.size	0.0561234	0.135873
trunk.decreased.length	0.0561085	0.135927
fourth.ventricle.edematous	0.0556148	0.137712
angiogenesis.disrupted	0.053389	0.146083
dorsal.aorta.morphology	0.053389	0.146083
hematopoietic.stem.cell.differentiation.disrupted	0.053389	0.146083
intersegmental.vessel.aplastic	0.053389	0.146083
thymus.primordium.common.lymphoid.progenitor.absent	0.053389	0.146083
vasculogenesis.disrupted	0.053389	0.146083
ventral.wall.of.dorsal.aorta.hematopoietic.stem.cell.absent	0.053389	0.146083
telencephalon.hypoplastic	0.0498289	0.160646
lens.increased.size	0.0487569	0.165338
testis.seminoma.present	0.0477046	0.170091
whole.organism.Lymphoid.neoplasms.neoplastic.malignant	0.0477046	0.170091
erythrocyte.development.disrupted	0.0455083	0.180509
forebrain.morphology	0.0455083	0.180509
nucleate.erythrocyte.hemoglobin.complex.decreased.amount	0.0455083	0.180509
notochord.bent	0.042383	0.196587
fourth.ventricle.opaque	0.0391608	0.214886
ball.increased.size	0.0359709	0.234961
trunk.undulate	0.0354004	0.238777
optic.tectum.increased.size	0.034693	0.243613
fourth.ventricle.increased.size	0.0329141	0.256293
protein.kinase.B.signaling.decreased.occurrence	0.0318986	0.263886
ribosomal.protein.S6.kinase.activity.increased.occurrence	0.0318986	0.263886
extension.decreased.length	0.0306322	0.273738
brain.necrotic	0.0288717	0.288191
peripheral.nervous.system.chromosome.am	0.0274854	0.30024
midbrain.aplastic	0.0274507	0.30055
brain.apoptotic	0.0228794	0.345156
whole.organism.decreased.length	0.0201405	0.376102
trunk.curved.dorsal	0.0200244	0.377494
otic.placode.aplastic	0.0196858	0.381599
heart.edematous	0.0188418	0.392104
peripheral.nervous.system.chromosome.amount	0.0164389	0.424355
ball.deformed	0.0156085	0.436402
swim.bladder.inflation.disrupted	0.0134693	0.469928
swim.bladder.quality	0.0134693	0.469928
forebrain.protruding	0.0130095	0.47766
whole.organism.edematous	0.0129003	0.479525
whole.organism.decreased.size	0.0127028	0.48293
fin.decreased.thickness	0.0124871	0.486693
fourth.ventricle.decreased.size	0.0124871	0.486693
midbrain.hindbrain.boundary.decreased.thickness	0.0107481	0.518899
ball.opaque	0.0101522	0.530781
heart.quality	0.00963985	0.54139
telencephalon.decreased.size	0.00925983	0.549509
notochord.undulate	0.00864392	0.563156
blood.circulation.disrupted	0.00837292	0.569366
cell.death.increased.occurrence	0.00837292	0.569366
convergent.extension.involved.in.gastrulation.disrupted	0.00837292	0.569366
establishment.of.cell.polarity.disrupted	0.00837292	0.569366
establishment.of.mitotic.spindle.orientation.disrupted	0.00837292	0.569366
intersegmental.vessel.decreased.functionality	0.00837292	0.569366
notochord.increased.width	0.00837292	0.569366
somite.increased.width	0.00837292	0.569366
whole.organism.curved.ventral	0.00837292	0.569366
trunk.increased.width	0.00815267	0.574511
yolk.non.functional	0.00772392	0.584791
extension.deformed	0.00683566	0.607317
hindbrain.opaque	0.00530518	0.650865
erythrocyte.differentiation.disrupted	0.00516744	0.655141
otolith.organ.decreased.size	0.00454622	0.675318
otolith.organ.deformed	0.00402696	0.69346
head.protruding	0.00321218	0.724865
eye.color	0.0028187	0.741649
yolk.swollen	0.00278129	0.74331
otic.placode.shape	0.00273109	0.74556
brain.aplastic	0.00266738	0.748447
forebrain.increased.size	0.00251811	0.755365
embryo.development.process.quality	0.00251111	0.755695
extension.yolk.absent	0.00251111	0.755695
ventricular.system.increased.size	0.00251111	0.755695
erythroid.lineage.cell.absent	0.00218538	0.771636
hemoglobin.biosynthetic.process.decreased.process.quality	0.00218538	0.771636
hemopoiesis.process.quality	0.00218538	0.771636
whole.organism.decreased.life.span	0.00218538	0.771636
yolk.edematous	0.00208101	0.777014
head.circular	0.00178694	0.792997
pancreas.hypoplastic	0.00178694	0.792997
exocrine.pancreas.decreased.size	0.00161397	0.803062
exocrine.pancreas.development.disrupted	0.00161397	0.803062
blood.apoptotic.process.increased.process.quality	0.00140466	0.81604
brain.segmentation.disrupted	0.00140466	0.81604
caudal.fin.curved	0.00140466	0.81604
cranial.cartilage.malformed	0.00140466	0.81604
cranium.edematous	0.00140466	0.81604
digestive.system.position	0.00140466	0.81604
embryo.development.arrested	0.00140466	0.81604
erythrocyte.differentiation.decreased.occurrence	0.00140466	0.81604
eye.aplastic	0.00140466	0.81604
eye.hypoplastic	0.00140466	0.81604
eye.immature	0.00140466	0.81604
forebrain.aplastic	0.00140466	0.81604
forebrain.decreased.size	0.00140466	0.81604
heart.primordium.position	0.00140466	0.81604
hematopoietic.stem.cell.decreased.amount	0.00140466	0.81604
intermediate.cell.mass.of.mesoderm.erythroblast.increased.amount	0.00140466	0.81604
lens.absent	0.00140466	0.81604
nucleate.erythrocyte.apoptotic	0.00140466	0.81604
optic.primordium.decreased.size	0.00140466	0.81604
optic.tectum.aplastic	0.00140466	0.81604
otic.vesicle.decreased.size	0.00140466	0.81604
pharyngeal.arch.3.7.immature	0.00140466	0.81604
thymus.T.cell.decreased.amount	0.00140466	0.81604
whole.organism.anterior.posterior.axis.curved	0.00140466	0.81604
whole.organism.apoptotic	0.00140466	0.81604
whole.organism.morphology	0.00140466	0.81604
whole.organism.ribosome.decreased.amount	0.00140466	0.81604
pancreas.decreased.volume	0.00112594	0.835018
pancreas.development.delayed	0.00112594	0.835018
pancreas.morphogenesis.disrupted	0.00112594	0.835018
trunk.bent	0.00107363	0.838844
peripheral.nervous.system.nerve.neoplastic	0.00106889	0.839195
embryo.development.delayed	0.00102008	0.842863
forebrain.apoptotic.process.increased.process.quality	0.000920954	0.850601
head.cytosolic.ribosome.increased.amount	0.000920954	0.850601
head.polysome.decreased.amount	0.000920954	0.850601
hindbrain.apoptotic.process.increased.process.quality	0.000920954	0.850601
brain.structure	0.00077292	0.86301
caudal.fin.shortened	0.00077292	0.86301
cell.aging.decreased.magnitude	0.00077292	0.86301
cell.population.proliferation.decreased.occurrence	0.00077292	0.86301
common.cardinal.vein.circulating.cell.decreased.amount	0.00077292	0.86301
erythroid.lineage.cell.decreased.amount	0.00077292	0.86301
erythroid.lineage.cell.increased.size	0.00077292	0.86301
extension.decreased.size	0.00077292	0.86301
extension.morphology	0.00077292	0.86301
eye.pigmentation.delayed	0.00077292	0.86301
gut.absent	0.00077292	0.86301
gut.aplastic	0.00077292	0.86301
gut.immature	0.00077292	0.86301
head.aplastic	0.00077292	0.86301
head.opaque	0.00077292	0.86301
inner.ear.morphology	0.00077292	0.86301
intermediate.cell.mass.of.mesoderm.cell.population.proliferation.decreased.occurrence	0.00077292	0.86301
intermediate.cell.mass.of.mesoderm.hematopoietic.multipotent.progenitor.cell.decreased.amount	0.00077292	0.86301
liver.absent	0.00077292	0.86301
liver.immature	0.00077292	0.86301
midbrain.hindbrain.boundary.structural.organization.disrupted	0.00077292	0.86301
mouth.absent	0.00077292	0.86301
nucleate.erythrocyte.increased.size	0.00077292	0.86301
nucleate.erythrocyte.irregularly.shaped	0.00077292	0.86301
nucleate.erythrocyte.maturation.disrupted	0.00077292	0.86301
otolith.deformed	0.00077292	0.86301
regulation.of.glucose.metabolic.process.disrupted	0.00077292	0.86301
regulation.of.transcription.DNA.templated.disrupted	0.00077292	0.86301
swim.bladder.absent	0.00077292	0.86301
whole.organism.decreased.pigmentation	0.00077292	0.86301
whole.organism.polysome.decreased.amount	0.00077292	0.86301
tegmentum.opaque	0.000526513	0.886764
cerebellum.decreased.thickness	0.000384734	0.903119
fin.aplastic	0.000322114	0.911319
head.flat	0.000300242	0.914371
trunk.curved	0.000264738	0.919575
telencephalon.morphology	0.000245557	0.922535
trunk.curved.ventral	0.000217793	0.927033
trunk.degenerate	0.000217793	0.927033
yolk.syncytial.layer.decreased.thickness	0.000217793	0.927033
head.apoptotic.process.increased.process.quality	2.60812e-05	0.97472

## Sheet: fish_genes_cos2
	Dim 1	Dim 2	Dim 3	Dim 4	Dim 5
rack1	0.00874298	0.00509877	6.05141e-05	0.111316	0.0107587
rpl10	0.0206994	0.000844424	0.000460272	0.0748056	0.00240609
rpl11	0.90189	0.0952563	0.000729525	0.000861048	0.000276157
rpl12	0.00582271	0.0268097	0.00555463	0.0111042	0.137334
rpl13	0.0646808	0.035083	0.0307119	0.0198819	0.0966694
rpl14	0.0414351	0.0134538	0.0212835	0.0100122	0.0716235
rpl19	0.0496384	0.0292366	0.0130666	0.0301118	0.119958
rpl23	0.0497233	0.00903777	0.000687429	0.101459	0.0719724
rpl23a	0.0431596	0.0095776	0.000841812	0.0736656	0.000126763
rpl24	0.0209783	0.00664603	0.0150738	0.00686802	0.000551198
rpl27	0.0637655	0.0106782	1.21547e-05	0.118264	0.0143973
rpl28	0.000192409	4.26634e-05	0.00847417	0.00103679	0.00965011
rpl3	0.0321108	0.012022	0.00465745	0.0368219	0.00794038
rpl35	0.004376	0.00019357	0.00857305	0.0182042	0.0030669
rpl35a	0.00273742	0.000521539	0.0353059	0.000787335	0.0532719
rpl36	0.0728714	0.0304193	0.0177496	0.0499168	0.0315586
rpl36a	0.012136	0.000480922	0.00113436	0.00510882	0.00713912
rpl38	0.00718984	0.00294588	0.0159323	0.00022505	0.0455939
rpl5a	4.63008e-05	0.000188123	0.0960859	0.00796008	0.704308
rpl6	4.04721e-05	0.00084221	0.0272412	0.00271873	0.00351085
rpl7	0.0655161	0.0346889	0.0345276	0.0111086	0.0990218
rpl7l1	0.0404989	0.010769	0.00289305	0.0388104	0.0146783
rpl9	0.0365059	0.0273497	0.00676426	0.0776551	0.0358989
rplp0	0.0403809	2.65226e-06	0.0317895	0.0351605	0.0539143
rplp1	0.0175963	0.0212336	0.0109364	0.0187187	0.0441822
rps11	0.0132319	0.0427298	0.00470303	0.0105881	0.161152
rps12	0.0977132	0.0430757	0.0112368	0.0835025	0.0543634
rps15	0.023144	0.00389399	0.00016527	0.000443861	0.0190508
rps15a	0.00133695	0.0107742	0.0139371	0.0138581	0.000450143
rps19	0.105438	0.879684	0.00569644	0.00686977	0.000572889
rps23	0.000190493	0.0135834	0.141893	0.65247	0.0448895
rps27.1	0.0537301	0.00899649	0.000216818	0.101517	0.0324284
rps28	0.11166	0.0184372	0.00416282	0.205057	0.00907429
rps29	0.000260717	0.0141464	0.136976	0.668938	0.0451722
rps3	0.00572924	8.26632e-05	0.029169	0.00126372	0.0342471
rps3a	1.67415e-07	0.000327595	0.00287882	0.0229178	0.0201231
rps4x	0.0147017	0.0009734	0.0373755	0.00343278	0.0601905
rps5	0.0821343	0.0275066	0.0123033	0.0469317	0.0595625
rps7	0.000441695	0.00823281	0.776458	0.159348	0.0454749
rps8a	0.00853581	0.000739197	0.0214153	0.0579753	0.00403524
rpsa	0.0249891	0.0180799	0.0105406	0.0271669	0.0760143

## Sheet: fish_gene_expression
GENE	rack1	rpl10	rpl11	rpl12	rpl13	rpl14	rpl19	rpl23	rpl23a	rpl24	rpl27	rpl28	rpl3	rpl35	rpl35a	rpl36	rpl36a	rpl38	rpl5a	rpl6	rpl7	rpl7l1	rpl9	rplp0	rplp1	rps11	rps12	rps15	rps15a	rps19	rps23	rps27.1	rps28	rps29	rps3	rps3a	rps4x	rps5	rps7	rps8a	rpsa
whole organism socs3a expression increased amount	n	n	y	n	n	n	n	n	n	n	n	n	n	n	n	n	n	n	n	n	n	n	n	n	n	n	n	n	n	n	n	n	n	n	n	n	n	n	n	n	n
whole organism ifih1 expression increased amount	n	n	y	n	n	n	n	n	n	n	n	n	n	n	n	n	n	n	n	n	n	n	n	n	n	n	n	n	n	n	n	n	n	n	n	n	n	n	n	n	n
whole organism mmp13a expression increased amount	n	n	y	n	n	n	n	n	n	n	n	n	n	n	n	n	n	n	n	n	n	n	n	n	n	n	n	n	n	n	n	n	n	n	n	n	n	n	n	n	n
whole organism cfb expression increased amount	n	n	y	n	n	n	n	n	n	n	n	n	n	n	n	n	n	n	n	n	n	n	n	n	n	n	n	n	n	n	n	n	n	n	n	n	n	n	n	n	n
eye mycb expression increased amount	n	n	y	n	n	n	n	n	n	n	n	n	n	n	n	n	n	n	n	n	n	n	n	n	n	n	n	n	n	n	n	n	n	n	n	n	n	n	n	n	n
head mycb expression increased amount	n	n	y	n	n	n	n	n	n	n	n	n	n	n	n	n	n	n	n	n	n	n	n	n	n	n	n	n	n	n	n	n	n	n	n	n	n	n	n	n	n
whole organism mybbp1a expression increased amount	n	n	y	n	n	n	n	n	n	n	n	n	n	n	n	n	n	n	n	n	n	n	n	n	n	n	n	n	n	n	n	n	n	n	n	n	n	n	n	n	n
head ccng1 expression increased amount	n	n	y	n	n	n	n	n	n	n	n	n	n	n	n	n	n	n	n	n	n	n	n	n	n	n	n	n	n	n	n	n	n	n	n	n	n	n	n	n	n
whole organism mdm2 expression increased amount	n	n	y	n	n	n	n	n	n	n	n	n	n	n	n	n	n	n	n	n	n	n	n	n	n	n	n	n	n	n	n	n	n	n	n	n	n	n	n	n	n
erythroid lineage cell EGFP expression decreased amount	n	n	y	n	n	n	n	n	n	n	n	n	n	n	n	n	n	n	n	n	n	n	n	n	n	n	n	n	n	n	n	n	n	n	n	n	n	n	n	n	n
intermediate cell mass of mesoderm pcna expression decreased amount	n	n	y	n	n	n	n	n	n	n	n	n	n	n	n	n	n	n	n	n	n	n	n	n	n	n	n	n	n	n	n	n	n	n	n	n	n	n	n	n	n
whole organism mdm2 expression amount, ameliorated	n	n	y	n	n	n	n	n	n	n	n	n	n	n	n	n	n	n	n	n	n	n	n	n	n	n	n	n	n	n	n	n	n	n	n	n	n	n	n	n	n
whole organism lft1 expression increased amount	n	n	y	n	n	n	n	n	n	n	n	n	n	n	n	n	n	n	n	n	n	n	n	n	n	n	n	n	n	n	n	n	n	n	n	n	n	n	n	n	n
angioblastic mesenchymal cell tal1 expression decreased amount	n	n	n	n	n	n	n	n	n	n	n	n	n	n	n	n	n	n	y	n	n	n	n	n	n	n	n	n	n	n	n	n	n	n	n	n	n	n	n	n	n
common myeloid progenitor spi1b expression decreased amount	n	n	n	n	n	n	n	n	n	n	n	n	n	n	n	n	n	n	y	n	n	n	n	n	n	n	n	n	n	n	n	n	n	n	n	n	n	n	n	n	n
erythroid progenitor cell gata1a expression decreased amount	n	n	n	n	n	n	n	n	n	n	n	n	n	n	n	n	n	n	y	n	n	n	n	n	n	n	n	n	n	n	n	n	n	n	n	n	n	n	n	n	n
hematopoietic stem cell myb expression decreased amount	n	n	n	n	n	n	n	n	n	n	n	n	n	n	n	n	n	n	y	n	n	n	n	n	n	n	n	n	n	n	n	n	n	n	n	n	n	n	n	n	n
hematopoietic stem cell runx1 expression decreased amount	n	n	n	n	n	n	n	n	n	n	n	n	n	n	n	n	n	n	y	n	n	n	n	n	n	n	n	n	n	n	n	n	n	n	n	n	n	n	n	n	n
whole organism abce1 expression decreased amount	n	n	n	n	n	n	n	n	n	n	n	n	n	n	n	n	n	n	y	n	n	n	n	n	n	n	n	n	n	n	n	n	n	n	n	n	n	n	n	n	n
whole organism mir10a expression increased amount	n	n	n	n	n	n	n	n	n	n	n	n	n	n	n	n	n	n	y	n	n	n	n	n	n	n	n	n	n	n	n	n	n	n	n	n	n	n	n	n	n
whole organism mir142a expression increased amount	n	n	n	n	n	n	n	n	n	n	n	n	n	n	n	n	n	n	y	n	n	n	n	n	n	n	n	n	n	n	n	n	n	n	n	n	n	n	n	n	n
whole organism mir155 expression increased amount	n	n	n	n	n	n	n	n	n	n	n	n	n	n	n	n	n	n	y	n	n	n	n	n	n	n	n	n	n	n	n	n	n	n	n	n	n	n	n	n	n
whole organism mir223 expression increased amount	n	n	n	n	n	n	n	n	n	n	n	n	n	n	n	n	n	n	y	n	n	n	n	n	n	n	n	n	n	n	n	n	n	n	n	n	n	n	n	n	n
whole organism mir722 expression increased amount	n	n	n	n	n	n	n	n	n	n	n	n	n	n	n	n	n	n	y	n	n	n	n	n	n	n	n	n	n	n	n	n	n	n	n	n	n	n	n	n	n
whole organism mir737 expression increased amount	n	n	n	n	n	n	n	n	n	n	n	n	n	n	n	n	n	n	y	n	n	n	n	n	n	n	n	n	n	n	n	n	n	n	n	n	n	n	n	n	n
whole organism noc2l expression decreased amount	n	n	n	n	n	n	n	n	n	n	n	n	n	n	n	n	n	n	y	n	n	n	n	n	n	n	n	n	n	n	n	n	n	n	n	n	n	n	n	n	n
whole organism nol6 expression decreased amount	n	n	n	n	n	n	n	n	n	n	n	n	n	n	n	n	n	n	y	n	n	n	n	n	n	n	n	n	n	n	n	n	n	n	n	n	n	n	n	n	n
whole organism tars1 expression decreased amount	n	n	n	n	n	n	n	n	n	n	n	n	n	n	n	n	n	n	y	n	n	n	n	n	n	n	n	n	n	n	n	n	n	n	n	n	n	n	n	n	n
whole organism utp4 expression decreased amount	n	n	n	n	n	n	n	n	n	n	n	n	n	n	n	n	n	n	y	n	n	n	n	n	n	n	n	n	n	n	n	n	n	n	n	n	n	n	n	n	n
whole organism isg15 expression increased amount	n	n	n	n	n	n	n	n	n	n	n	n	n	n	n	n	n	n	n	n	n	n	n	n	n	n	n	n	n	y	n	n	n	n	n	n	n	n	n	n	n
whole organism tlr1 expression increased amount	n	n	n	n	n	n	n	n	n	n	n	n	n	n	n	n	n	n	n	n	n	n	n	n	n	n	n	n	n	y	n	n	n	n	n	n	n	n	n	n	n
whole organism fn1b expression increased amount	n	n	n	n	n	n	n	n	n	n	n	n	n	n	n	n	n	n	n	n	n	n	n	n	n	n	n	n	n	y	n	n	n	n	n	n	n	n	n	n	n
whole organism inha expression decreased amount	n	n	n	n	n	n	n	n	n	n	n	n	n	n	n	n	n	n	n	n	n	n	n	n	n	n	n	n	n	y	n	n	n	n	n	n	n	n	n	n	n
whole organism smad7 expression increased amount	n	n	n	n	n	n	n	n	n	n	n	n	n	n	n	n	n	n	n	n	n	n	n	n	n	n	n	n	n	y	n	n	n	n	n	n	n	n	n	n	n
whole organism cfh expression increased amount	n	n	n	n	n	n	n	n	n	n	n	n	n	n	n	n	n	n	n	n	n	n	n	n	n	n	n	n	n	y	n	n	n	n	n	n	n	n	n	n	n
whole organism cdkn1a expression increased amount	n	n	n	n	n	n	n	n	n	n	n	n	n	n	n	n	n	n	n	n	n	n	n	n	n	n	n	n	n	y	n	n	n	n	n	n	n	n	n	n	n
