# Supplementary material for: Ribosomal proteins: mutant phenotypes by the numbers and associated gene expression changes
Source: Open Biol. 2020 Aug 19;10(8):200114. doi: 10.1098/rsob.200114 (PMC7479938; doi:10.1098/rsob.200114)
Supplement: Fly MCA datasets [file rsob200114supp3.xlsx]

## Sheet: fly_phenotypes
	cell cycle defective	cell death defective	cell growth defective	cell lethal	decreased cell number	decreased cell size	decreased fecundity	decreased occurrence of cell division	developmental rate defective	female fertile	female semi-fertile	female sterile	hyperplasia	increased cell death	increased cell size	large body	lethal - all die before end of first instar larval stage	lethal - all die before end of larval stage	lethal - all die before end of second instar larval stage	lethal - all die during embryonic stage	lethal - all die during first instar larval stage	lethal - all die during larval stage	lethal - all die during pupal stage	male sterile	Minute	mitotic cell cycle defective	neuroanatomy defective	non-suppressor of variegation	pain response defective	partially lethal	partially lethal - majority die	partially lethal - majority live	short lived	size defective	small body	some die during embryonic stage	some die during first instar larval stage	some die during immature adult stage	some die during larval stage	some die during pupal stage	suppressor of variegation	tumorigenic progressive spermatogenesis	visible
RpL10	n	n	n	n	n	n	n	n	n	n	n	n	n	n	n	n	n	n	n	n	n	y	n	n	n	n	n	n	y	n	n	n	n	n	n	n	n	n	y	n	n	n	n
RpL10Aa	n	n	n	n	n	n	n	n	n	n	n	n	n	n	n	n	n	n	n	y	n	y	n	n	n	n	y	n	n	n	y	n	n	n	n	n	n	n	n	n	n	n	y
RpL10Ab	n	n	n	n	n	n	n	n	n	n	n	n	n	n	n	n	n	y	n	n	n	y	n	n	n	n	n	n	n	n	n	n	n	n	n	n	n	n	n	n	n	n	n
RpL11	n	n	n	n	n	n	n	n	n	n	n	n	n	n	n	n	n	n	n	n	n	y	n	n	n	n	n	n	y	y	n	n	n	n	n	n	n	n	n	y	n	n	n
RpL12	n	n	n	n	n	n	n	n	y	n	n	n	n	n	n	n	n	n	n	y	n	n	n	n	n	n	n	n	n	n	n	n	n	n	n	n	n	n	n	n	n	n	n
RpL13A	n	n	n	n	n	n	n	n	n	n	n	n	n	n	n	n	n	n	n	y	n	n	n	n	y	n	n	n	n	n	n	n	n	n	n	n	n	n	n	n	n	n	y
Rpl14	n	n	y	n	n	n	n	n	y	n	n	n	n	n	n	n	n	n	n	y	n	y	y	n	y	n	n	n	n	y	n	n	n	n	n	y	n	y	n	y	n	n	y
RpL15	n	n	n	n	n	n	y	n	y	n	n	n	n	n	n	n	y	y	n	n	n	y	n	n	y	n	n	n	n	y	n	n	n	n	n	n	y	n	y	n	n	n	y
RpL17	n	n	n	n	n	n	n	n	n	n	n	n	n	n	n	n	n	n	n	n	n	y	n	n	n	n	n	n	n	y	n	n	n	n	n	n	n	n	n	n	n	n	n
RpL18	n	n	n	n	n	n	n	n	n	n	n	n	n	n	n	n	n	n	n	n	n	y	y	n	n	n	n	n	n	n	n	n	n	n	n	n	n	n	n	y	n	n	n
RpL19	n	n	n	n	n	n	n	n	y	n	n	n	n	n	n	n	n	n	n	n	n	n	n	n	y	n	n	n	n	n	n	n	n	n	n	n	n	n	n	n	n	n	y
RpL21	n	n	n	n	n	n	n	n	n	n	n	n	n	n	n	n	n	n	n	n	n	n	n	n	n	n	n	n	n	n	n	n	n	n	n	n	n	n	n	n	n	n	n
Rpl22	n	n	n	n	n	n	n	n	n	n	n	n	n	n	n	n	n	n	n	n	n	n	n	n	n	n	y	n	n	n	n	n	n	n	y	n	n	n	n	n	n	n	n
RpL23	n	n	n	n	n	n	n	n	n	n	n	n	n	n	n	n	n	n	n	y	n	n	n	n	n	n	y	n	n	n	n	n	n	n	n	n	n	n	n	n	n	n	n
RpL24-like	n	n	n	n	n	n	n	n	n	n	n	n	n	n	n	n	n	n	n	n	n	n	n	n	n	n	n	n	n	n	n	n	n	n	y	n	n	n	n	n	n	n	n
Rpl24	n	n	n	y	n	n	n	n	n	n	n	n	n	n	n	n	n	n	n	n	n	n	n	n	n	n	n	n	n	n	n	n	n	n	n	n	n	n	n	n	n	n	n
RpL26	n	n	n	n	n	n	n	n	n	n	n	n	n	n	n	n	n	n	n	n	n	y	n	n	n	n	n	n	n	y	n	n	n	n	n	n	n	n	y	n	n	n	n
RpL27	n	n	n	n	n	n	n	n	n	n	n	n	n	n	n	n	n	n	n	n	n	y	n	n	n	n	n	n	n	n	n	n	n	n	n	n	n	n	y	n	n	n	n
RpL27A	n	n	n	n	n	n	n	n	y	n	n	n	n	n	n	n	n	n	n	y	n	n	n	n	y	n	n	n	n	n	n	n	n	y	y	n	n	n	n	n	n	n	y
RpL28	n	n	n	n	n	n	n	n	n	n	n	n	n	n	n	n	n	n	n	n	n	n	y	n	n	n	y	n	n	y	n	n	n	n	n	n	n	n	n	y	n	n	y
RpL3	n	n	n	n	n	n	n	n	n	n	n	n	n	n	n	n	n	n	n	n	n	n	n	n	n	n	n	n	y	y	n	n	n	n	n	n	n	n	y	n	n	n	n
Rpl30	n	y	n	n	n	n	n	y	y	n	n	n	n	n	n	n	n	y	n	y	n	n	n	n	y	y	n	n	n	n	n	n	n	n	n	y	n	n	y	n	n	n	n
RpL31	n	n	n	n	n	n	n	n	n	n	n	n	n	n	n	n	n	n	n	n	n	n	y	n	y	n	n	n	n	y	n	n	n	n	n	n	n	n	n	y	n	n	n
RpL34a	n	n	n	n	n	n	n	n	n	n	n	n	n	n	n	n	n	n	n	n	n	n	n	n	n	n	n	n	n	y	n	n	n	n	n	n	n	n	n	y	n	n	n
RpL35	n	n	n	n	n	n	n	n	n	n	n	n	n	n	n	n	n	n	n	n	n	n	n	n	n	n	n	n	n	n	n	n	n	n	n	n	n	n	n	n	n	n	n
Rpl35A	n	n	n	n	n	n	n	n	n	n	n	n	n	n	n	n	n	n	n	n	n	y	n	n	n	n	n	n	n	n	n	n	n	n	y	n	n	n	n	n	n	n	n
RpL36	n	n	n	y	n	n	n	n	y	n	n	n	n	n	n	n	n	y	n	n	n	n	y	y	y	n	n	n	n	y	n	n	n	n	n	n	n	n	y	y	n	n	y
RpL36A	n	n	n	n	n	n	n	n	n	n	n	n	n	n	n	n	n	n	n	n	n	y	n	n	n	n	n	n	n	y	n	n	n	n	n	n	n	n	n	y	n	n	n
Rpl37A	n	n	n	n	n	n	n	n	n	n	n	n	n	n	n	n	n	n	n	n	n	y	n	n	y	n	n	n	n	y	n	n	n	n	n	n	n	n	y	y	n	n	y
RpL37b	n	n	n	n	n	n	n	n	n	n	n	n	n	n	n	n	n	n	n	n	n	n	n	n	n	n	n	n	n	n	n	n	n	n	n	n	n	n	n	n	n	n	y
RpL38	n	n	n	n	y	n	n	n	y	n	n	n	n	n	y	n	n	n	n	y	n	y	n	n	y	n	n	n	n	y	n	n	n	n	n	y	n	n	n	n	n	n	y
RpL39	n	n	n	n	n	n	n	n	n	n	n	n	n	n	n	n	n	n	n	n	n	y	y	n	n	n	n	n	n	n	n	n	n	n	n	n	n	n	n	y	n	n	n
RpL4	n	n	n	n	n	n	n	n	n	n	n	n	n	n	n	n	n	n	n	n	n	y	n	n	n	n	n	n	n	y	n	n	n	n	n	n	n	n	y	n	n	n	n
Rpl40	n	n	n	n	n	n	n	n	n	n	n	n	n	n	n	n	n	n	n	n	n	n	n	n	n	n	n	n	n	n	y	n	n	n	n	n	n	n	n	n	n	n	y
RpL5	n	n	n	n	y	n	n	n	y	n	n	n	n	n	y	n	n	y	n	n	n	n	n	n	y	n	n	n	n	n	n	n	n	y	y	n	n	n	y	n	n	n	n
RpL6	n	n	n	n	n	n	n	n	n	n	n	n	n	n	n	n	n	n	n	n	n	n	n	n	n	n	n	n	n	n	n	n	n	y	n	n	n	n	y	n	n	y	n
RpL7-like	n	n	n	n	n	n	n	n	n	n	n	n	n	n	n	n	n	n	n	n	n	n	n	n	n	n	y	n	n	n	n	n	n	n	n	n	n	n	n	n	n	n	n
RpL7	n	n	n	n	n	n	n	n	y	n	n	n	n	n	n	n	n	n	n	n	n	y	n	n	n	n	n	n	n	n	n	n	n	n	n	n	n	n	n	n	n	n	n
Rpl7A	n	n	n	n	y	n	n	n	n	n	n	n	n	n	n	n	n	n	n	n	n	y	y	n	n	n	y	n	n	y	n	n	n	n	n	n	n	n	y	y	n	n	n
RpL8	n	n	n	n	n	y	n	n	n	n	n	n	n	n	n	n	n	n	n	n	n	y	y	n	n	n	n	n	n	y	n	n	n	n	n	n	n	n	n	y	n	n	n
RpL9	n	n	n	n	n	n	n	n	n	n	n	n	n	n	n	n	n	n	n	n	n	y	y	n	y	n	n	n	n	y	n	n	n	n	n	y	n	n	n	y	n	n	y
RpLP0-like	n	n	n	n	n	n	n	n	n	n	n	n	n	n	n	n	n	n	n	n	n	n	n	n	n	n	n	n	n	n	n	n	n	n	n	n	n	n	n	n	n	n	y
RpLP0	n	n	n	n	n	n	n	n	n	n	n	n	n	n	n	n	n	n	n	y	n	y	n	n	n	n	n	y	n	y	n	n	n	n	n	n	n	n	y	n	y	n	n
RpLP1	n	n	n	n	n	n	n	n	y	n	n	n	n	n	n	n	n	n	n	n	n	y	n	n	y	n	n	n	n	n	n	n	n	y	n	n	n	n	n	n	n	n	n
RpS10a	n	n	n	n	n	n	n	n	n	n	n	n	n	n	n	n	n	n	n	n	n	n	n	n	n	n	y	n	n	n	y	n	n	n	n	n	n	n	n	n	n	n	y
RpS10b	n	n	n	n	n	n	y	n	n	n	n	n	n	n	n	n	n	y	n	n	n	n	y	n	y	y	n	n	n	n	n	n	n	n	n	n	n	n	y	y	n	n	y
RpS11	n	n	n	n	n	n	n	n	n	n	n	n	n	n	n	n	n	n	n	n	n	n	y	n	y	n	y	n	n	n	n	n	n	n	n	n	n	n	n	y	n	n	n
RpS12	n	n	n	y	n	n	n	n	n	n	n	n	n	n	n	n	n	n	y	n	n	n	n	n	n	n	n	n	n	n	n	n	n	n	n	n	n	n	n	n	n	n	n
RpS13	n	n	n	n	n	n	n	n	n	n	n	n	n	n	n	n	n	n	n	n	n	y	y	n	y	n	n	n	n	y	n	n	n	y	n	n	n	n	n	y	n	n	y
RpS15	n	n	n	n	n	n	n	n	n	n	n	n	n	n	n	n	n	n	n	n	n	y	n	n	n	n	n	n	n	y	n	n	n	n	n	n	n	n	n	n	n	n	n
RpS15Aa	n	n	n	n	n	n	n	n	n	n	n	n	n	n	n	n	n	n	n	n	n	y	n	n	n	n	n	n	n	n	y	n	n	y	n	n	n	n	n	n	n	n	n
RpS16	n	n	n	n	n	n	n	n	n	n	n	n	n	n	n	n	n	n	n	n	n	n	n	n	n	n	n	n	n	y	n	n	n	n	n	n	n	n	n	n	n	n	n
RpS17	n	n	n	y	n	n	n	n	y	n	n	y	n	n	n	n	n	n	n	n	n	n	n	n	y	n	n	n	n	n	n	y	n	y	n	n	n	n	n	n	n	n	y
RpS18	n	n	n	n	n	n	n	n	n	y	n	n	n	n	n	n	n	n	n	n	n	n	n	n	n	n	n	n	n	n	n	n	n	n	n	n	n	n	n	n	n	n	n
RpS19b	n	n	n	n	n	n	n	n	n	n	n	n	n	n	n	n	n	n	n	n	n	n	y	n	n	n	n	n	n	y	y	n	n	n	n	y	n	n	n	y	n	n	y
RpS2	y	n	n	n	n	n	n	n	n	n	n	y	n	n	n	n	n	y	n	n	y	y	n	n	n	n	n	n	n	y	y	n	n	n	n	n	n	n	y	n	n	n	y
RpS20	n	n	n	n	n	n	n	n	n	n	n	n	n	n	n	n	n	n	n	n	n	n	n	n	n	n	n	n	n	n	n	n	n	n	n	n	n	n	n	n	n	n	n
RpS21	n	n	n	n	n	n	n	n	y	n	n	n	y	n	n	n	n	y	n	n	n	y	n	n	y	n	n	n	n	y	n	n	y	n	y	n	n	n	y	n	n	n	y
RpS23	n	n	n	n	n	n	n	n	n	n	n	n	n	n	n	n	n	n	n	n	n	n	n	n	n	n	n	n	n	n	n	n	n	n	n	n	n	n	n	n	n	n	n
RpS24	n	n	n	n	n	n	n	n	n	n	n	n	n	n	n	n	n	n	n	n	n	y	y	n	y	n	n	n	n	n	n	n	n	n	n	n	n	n	y	y	n	n	n
RpS26	n	n	n	n	n	n	n	n	n	n	n	n	n	n	n	n	n	n	n	n	n	n	n	n	y	n	n	n	n	y	n	n	n	n	y	n	n	n	n	n	n	n	n
RpS27A	n	n	n	n	n	n	n	n	n	n	n	y	n	n	n	n	n	n	n	n	n	y	n	y	n	n	n	n	n	y	n	n	n	n	n	n	n	n	n	n	n	n	n
RpS28a	n	n	n	n	n	n	n	n	n	n	n	n	n	n	n	n	n	n	n	n	n	n	n	n	n	n	n	n	n	y	n	n	n	n	n	n	n	n	n	n	n	n	n
RpS28b	n	n	n	n	n	n	n	n	n	n	n	n	n	n	n	n	n	n	n	n	n	y	n	n	n	n	n	n	n	n	n	n	n	n	n	n	n	n	n	n	n	n	n
RpS29	n	n	n	n	n	n	n	n	n	n	n	n	n	n	n	n	n	n	n	n	n	y	y	n	y	n	y	n	n	n	n	n	n	n	n	n	n	n	n	y	n	n	n
RpS3	n	n	n	y	n	n	n	n	y	n	y	y	n	y	n	n	n	n	n	n	n	y	n	y	y	n	n	n	n	y	n	n	n	y	y	n	n	n	n	n	n	n	y
RpS30	n	n	n	n	n	n	n	n	n	n	n	n	n	n	n	n	n	n	n	n	n	y	y	n	n	n	n	n	n	y	n	n	n	n	n	n	n	n	n	y	n	n	n
RpS3A	n	n	n	n	n	n	y	n	y	n	n	n	n	n	n	n	n	y	n	n	n	n	n	n	y	n	n	n	n	n	n	n	n	y	n	n	n	n	y	n	n	n	y
RpS4	n	n	n	n	n	n	n	n	n	n	n	n	n	n	n	n	n	n	n	n	n	y	y	n	n	n	n	n	n	y	n	n	n	n	n	n	n	n	n	y	n	n	n
RpS5a	n	n	n	n	n	n	n	n	y	n	n	n	n	n	n	n	n	n	n	n	n	y	n	n	y	n	n	n	n	n	n	n	n	y	n	n	n	n	n	n	n	n	y
RpS5b	n	n	n	n	n	n	n	n	n	n	n	n	n	n	n	n	n	n	n	n	n	n	y	n	n	n	y	n	n	n	y	n	n	n	n	n	n	n	n	y	n	n	y
RpS6	n	n	n	n	n	n	n	n	y	n	n	n	y	n	n	y	n	y	n	n	n	n	n	n	y	n	n	n	n	n	n	n	n	n	n	n	n	n	y	n	n	n	y
RpS7	n	n	n	n	n	n	n	n	n	n	n	n	n	n	n	n	n	n	n	n	n	y	n	n	n	n	n	n	n	n	n	n	n	n	n	n	n	n	n	n	n	n	n
RpS8	n	n	n	n	n	n	n	n	n	n	n	n	n	n	n	n	n	n	n	n	n	y	n	n	n	n	y	n	n	n	n	n	n	n	n	n	n	n	n	n	n	n	n
Rps9	n	n	n	n	n	n	n	n	n	n	n	n	n	n	n	n	n	n	n	n	n	n	n	n	y	n	n	n	n	n	n	n	n	n	n	n	n	n	n	n	n	n	n

## Sheet: fly_eigen
	eigenvalue	percentage of variance	cumulative percentage of variance
dim 1	0.0110295	21.0506	21.0506
dim 2	0.00774246	14.777	35.8276
dim 3	0.00526857	10.0554	45.883
dim 4	0.004547	8.67825	54.5612
dim 5	0.00389609	7.43593	61.9972
dim 6	0.00316801	6.04634	68.0435
dim 7	0.00300342	5.73222	73.7757
dim 8	0.00244485	4.66615	78.4419
dim 9	0.00207959	3.96903	82.4109
dim 10	0.00149526	2.8538	85.2647
dim 11	0.00130152	2.48404	87.7488
dim 12	0.000999755	1.9081	89.6569
dim 13	0.000807725	1.5416	91.1984
dim 14	0.00070374	1.34313	92.5416
dim 15	0.000631749	1.20573	93.7473
dim 16	0.000583897	1.11441	94.8617
dim 17	0.000487094	0.929651	95.7914
dim 18	0.000444843	0.849013	96.6404
dim 19	0.000395303	0.754462	97.3948
dim 20	0.000322181	0.614904	98.0098
dim 21	0.000253263	0.483369	98.4931
dim 22	0.000213732	0.407921	98.901
dim 23	0.000161197	0.307655	99.2087
dim 24	8.60926e-05	0.164313	99.373
dim 25	8.18076e-05	0.156135	99.5291
dim 26	6.50493e-05	0.124151	99.6533
dim 27	5.74321e-05	0.109613	99.7629
dim 28	3.69375e-05	0.0704975	99.8334
dim 29	2.52982e-05	0.0482832	99.8817
dim 30	2.45442e-05	0.0468442	99.9285
dim 31	1.36267e-05	0.0260074	99.9545
dim 32	1.08272e-05	0.0206644	99.9752
dim 33	5.87705e-06	0.0112167	99.9864
dim 34	4.39449e-06	0.00838716	99.9948
dim 35	2.50014e-06	0.00477167	99.9996
dim 36	2.19766e-07	0.000419438	100
dim 37	6.71914e-64	1.28239e-60	100
dim 38	1.99348e-65	3.80469e-62	100
dim 39	1.57879e-65	3.01322e-62	100
dim 40	1.17671e-65	2.24583e-62	100
dim 41	8.91023e-66	1.70057e-62	100
dim 42	4.76242e-66	9.08939e-63	100
dim 43	3.39609e-66	6.48165e-63	100

## Sheet: fly_Dim1
	R2	p.value
developmental.rate.defective	0.623801	3.72054e-17
Minute	0.47573	7.72154e-12
lethal...all.die.before.end.of.larval.stage	0.473101	9.29219e-12
visible	0.275715	1.32183e-06
some.die.during.larval.stage	0.191878	8.48138e-05
female.semi.fertile	0.168742	0.000251514
increased.cell.death	0.168742	0.000251514
decreased.fecundity	0.161105	0.000358369
size.defective	0.156502	0.000443152
female.sterile	0.150238	0.000590948
mitotic.cell.cycle.defective	0.135608	0.00115155
male.sterile	0.132807	0.0013075
cell.death.defective	0.124112	0.00193683
decreased.occurrence.of.cell.division	0.124112	0.00193683
hyperplasia	0.120781	0.00225041
cell.lethal	0.102473	0.00511365
lethal...all.die.before.end.of.first.instar.larval.stage	0.102213	0.00517343
some.die.during.first.instar.larval.stage	0.102213	0.00517343
small.body	0.0947158	0.00723051
some.die.during.embryonic.stage	0.0809914	0.0133375
neuroanatomy.defectiveÂ.	0.0721224	0.0198233
short.lived	0.0696416	0.0221523
increased.cell.size	0.0688234	0.0229796
large.body	0.0502926	0.0530833
lethal...all.die.during.embryonic.stage	0.040581	0.0830784
partially.lethal...majority.live	0.0363092	0.101519
decreased.cell.number	0.0337247	0.114766
some.die.during.pupal.stage	0.0282424	0.149521
cell.growth.defective	0.0181962	0.248552
some.die.during.immature.adult.stage	0.0181962	0.248552
cell.cycle.defective	0.0180982	0.249843
lethal...all.die.during.first.instar.larval.stage	0.0180982	0.249843
pain.response.defective	0.0165591	0.271209
lethal...all.die.during.pupal.stage	0.0132753	0.324945
decreased.cell.size	0.0120824	0.347835
partially.lethal	0.0109701	0.371168
female.fertile	0.00907462	0.416231
partially.lethal...majority.die	0.00790874	0.448011
lethal...all.die.before.end.of.second.instar.larval.stage	0.00277379	0.653606
non.suppressor.of.variegation	0.00238587	0.677295
suppressor.of.variegation	0.00238587	0.677295
tumorigenic.progressive..spermatogenesis	0.000538515	0.843342
lethal...all.die.during.larval.stage	6.86247e-05	0.943766

## Sheet: fly_Dim2
	R2	p.value
female.semi.fertile	0.431528	1.55184e-10
increased.cell.death	0.431528	1.55184e-10
female.sterile	0.398836	1.23968e-09
male.sterile	0.29561	4.63167e-07
cell.lethal	0.287914	6.97063e-07
mitotic.cell.cycle.defective	0.252621	4.32573e-06
cell.death.defective	0.252518	4.34838e-06
decreased.occurrence.of.cell.division	0.252518	4.34838e-06
some.die.during.embryonic.stage	0.206882	4.13818e-05
lethal...all.die.during.embryonic.stage	0.127304	0.00167704
size.defective	0.116773	0.00269475
lethal...all.die.before.end.of.larval.stage	0.0830412	0.0121717
small.body	0.0813219	0.0131422
some.die.during.larval.stage	0.0731049	0.0189709
partially.lethal...majority.live	0.062412	0.0306488
decreased.fecundity	0.060305	0.0337019
cell.growth.defective	0.0544394	0.0439475
some.die.during.immature.adult.stage	0.0544394	0.0439475
lethal...all.die.during.pupal.stage	0.0380536	0.0935104
some.die.during.pupal.stage	0.0346143	0.110008
lethal...all.die.before.end.of.first.instar.larval.stage	0.0265346	0.162606
some.die.during.first.instar.larval.stage	0.0265346	0.162606
cell.cycle.defective	0.0200831	0.225204
lethal...all.die.during.first.instar.larval.stage	0.0200831	0.225204
Minute	0.0162044	0.276446
decreased.cell.number	0.01305	0.329113
increased.cell.size	0.0107275	0.37654
lethal...all.die.before.end.of.second.instar.larval.stage	0.0104384	0.383084
large.body	0.00707413	0.473106
hyperplasia	0.00704689	0.473963
non.suppressor.of.variegation	0.0059056	0.512265
suppressor.of.variegation	0.0059056	0.512265
lethal...all.die.during.larval.stage	0.00508295	0.543297
partially.lethal	0.00419993	0.580675
partially.lethal...majority.die	0.00252625	0.668476
developmental.rate.defective	0.00171326	0.724395
neuroanatomy.defectiveÂ.	0.00139747	0.750168
short.lived	0.00114274	0.773408
visible	0.00107941	0.779613
tumorigenic.progressive..spermatogenesis	0.000783706	0.811558
decreased.cell.size	0.000165966	0.912648
female.fertile	0.000141559	0.919303
pain.response.defective	3.89979e-05	0.957593

## Sheet: fly_Dim3
	R2	p.value
cell.growth.defective	0.428735	1.86147e-10
some.die.during.immature.adult.stage	0.428735	1.86147e-10
some.die.during.embryonic.stage	0.330449	6.90729e-08
lethal...all.die.during.pupal.stage	0.261746	2.71831e-06
some.die.during.pupal.stage	0.250906	4.71788e-06
lethal...all.die.before.end.of.larval.stage	0.146549	0.000699647
some.die.during.larval.stage	0.126942	0.0017047
lethal...all.die.during.embryonic.stage	0.111418	0.00342669
lethal...all.die.before.end.of.first.instar.larval.stage	0.103233	0.00494282
some.die.during.first.instar.larval.stage	0.103233	0.00494282
decreased.fecundity	0.0997468	0.00577603
hyperplasia	0.092123	0.00811726
partially.lethal	0.0898438	0.00898598
female.semi.fertile	0.0692161	0.0225787
increased.cell.death	0.0692161	0.0225787
large.body	0.0556957	0.0415123
male.sterile	0.0524914	0.0480178
short.lived	0.0362253	0.101922
cell.cycle.defective	0.0354503	0.105729
lethal...all.die.during.first.instar.larval.stage	0.0354503	0.105729
lethal...all.die.during.larval.stage	0.0343379	0.111463
Minute	0.0335628	0.115656
cell.lethal	0.0198815	0.22757
visible	0.0157212	0.283783
decreased.cell.number	0.0134631	0.321523
tumorigenic.progressive..spermatogenesis	0.0130813	0.328531
decreased.cell.size	0.0120966	0.347551
increased.cell.size	0.00803809	0.444307
pain.response.defective	0.00633641	0.497221
developmental.rate.defective	0.00623469	0.500705
female.sterile	0.00553778	0.525742
cell.death.defective	0.00528294	0.53545
decreased.occurrence.of.cell.division	0.00528294	0.53545
female.fertile	0.00503505	0.545208
neuroanatomy.defectiveÂ.	0.00380323	0.599159
small.body	0.00227349	0.684576
lethal...all.die.before.end.of.second.instar.larval.stage	0.0015825	0.734717
partially.lethal...majority.die	0.00116596	0.771179
partially.lethal...majority.live	0.00069801	0.82198
size.defective	0.000118775	0.926062
non.suppressor.of.variegation	0.000104152	0.930751
suppressor.of.variegation	0.000104152	0.930751
mitotic.cell.cycle.defective	2.98778e-06	0.988257

## Sheet: fly_Dim4
	R2	p.value
partially.lethal	0.265428	2.25052e-06
cell.death.defective	0.236778	9.57963e-06
decreased.occurrence.of.cell.division	0.236778	9.57963e-06
lethal...all.die.before.end.of.first.instar.larval.stage	0.200482	5.62745e-05
some.die.during.first.instar.larval.stage	0.200482	5.62745e-05
some.die.during.pupal.stage	0.200236	5.69401e-05
cell.cycle.defective	0.177188	0.000169572
lethal...all.die.during.first.instar.larval.stage	0.177188	0.000169572
lethal...all.die.during.pupal.stage	0.173926	0.000197522
lethal...all.die.during.larval.stage	0.170811	0.00022842
decreased.fecundity	0.107557	0.00407366
visible	0.0937778	0.00753957
mitotic.cell.cycle.defective	0.0848731	0.0112165
lethal...all.die.during.embryonic.stage	0.0685094	0.0233054
partially.lethal...majority.die	0.0474242	0.060536
cell.growth.defective	0.047273	0.0609579
some.die.during.immature.adult.stage	0.047273	0.0609579
small.body	0.0450285	0.0675934
size.defective	0.0423177	0.0766287
some.die.during.larval.stage	0.0396781	0.0866556
lethal...all.die.before.end.of.larval.stage	0.0345984	0.110091
cell.lethal	0.0329441	0.119125
lethal...all.die.before.end.of.second.instar.larval.stage	0.0204085	0.221446
decreased.cell.size	0.0191895	0.23592
increased.cell.size	0.0170579	0.264047
partially.lethal...majority.live	0.0160453	0.278835
developmental.rate.defective	0.0154461	0.288071
female.semi.fertile	0.0134391	0.321959
increased.cell.death	0.0134391	0.321959
tumorigenic.progressive..spermatogenesis	0.011466	0.36051
female.sterile	0.0113448	0.363075
female.fertile	0.0096059	0.402846
short.lived	0.0083595	0.435305
hyperplasia	0.00607278	0.506336
some.die.during.embryonic.stage	0.00258637	0.664788
decreased.cell.number	0.00239854	0.676487
pain.response.defective	0.00105054	0.782506
Minute	0.000503506	0.848457
large.body	0.00032506	0.877981
neuroanatomy.defectiveÂ.	0.000138149	0.920278
non.suppressor.of.variegation	6.24169e-05	0.946365
suppressor.of.variegation	6.24169e-05	0.946365
male.sterile	1.31909e-06	0.992197

## Sheet: fly_Dim5
	R2	p.value
cell.cycle.defective	0.563164	9.13469e-15
lethal...all.die.during.first.instar.larval.stage	0.563164	9.13469e-15
female.sterile	0.209717	3.6091e-05
partially.lethal...majority.die	0.19754	6.47721e-05
cell.death.defective	0.179913	0.000149222
decreased.occurrence.of.cell.division	0.179913	0.000149222
mitotic.cell.cycle.defective	0.100801	0.00551035
Minute	0.0776104	0.0155107
lethal...all.die.before.end.of.first.instar.larval.stage	0.0678359	0.02402
some.die.during.first.instar.larval.stage	0.0678359	0.02402
developmental.rate.defective	0.0573682	0.0384838
hyperplasia	0.0551467	0.0425588
small.body	0.0420785	0.0774847
decreased.fecundity	0.0376119	0.0954722
short.lived	0.0328474	0.119678
increased.cell.size	0.0296458	0.139641
decreased.cell.number	0.0261209	0.165965
size.defective	0.0257692	0.168882
some.die.during.embryonic.stage	0.0244694	0.180176
large.body	0.0220863	0.203195
lethal...all.die.during.embryonic.stage	0.0214317	0.210098
non.suppressor.of.variegation	0.0207715	0.217339
suppressor.of.variegation	0.0207715	0.217339
some.die.during.larval.stage	0.0134227	0.322255
lethal...all.die.before.end.of.larval.stage	0.0132035	0.326267
some.die.during.pupal.stage	0.0069073	0.47839
lethal...all.die.during.pupal.stage	0.00653871	0.49041
cell.growth.defective	0.00454373	0.565553
some.die.during.immature.adult.stage	0.00454373	0.565553
partially.lethal	0.00354156	0.612033
male.sterile	0.00338681	0.61993
lethal...all.die.during.larval.stage	0.0013776	0.751893
tumorigenic.progressive..spermatogenesis	0.000447345	0.857064
female.semi.fertile	0.000444585	0.857501
increased.cell.death	0.000444585	0.857501
partially.lethal...majority.live	0.000410045	0.863093
decreased.cell.size	0.000364238	0.870896
pain.response.defective	0.000343558	0.874585
neuroanatomy.defectiveÂ.	0.000212681	0.901171
visible	0.000163208	0.913374
female.fertile	4.65929e-05	0.953652
lethal...all.die.before.end.of.second.instar.larval.stage	3.97027e-05	0.957212
cell.lethal	3.54001e-06	0.987218

## Sheet: fly_Dim6
	R2	p.value
non.suppressor.of.variegation	0.229819	1.35237e-05
suppressor.of.variegation	0.229819	1.35237e-05
hyperplasia	0.198503	6.18626e-05
decreased.fecundity	0.165803	0.000288308
short.lived	0.139614	0.000959913
increased.cell.size	0.139452	0.000967039
mitotic.cell.cycle.defective	0.135037	0.00118181
lethal...all.die.before.end.of.first.instar.larval.stage	0.117721	0.00258236
some.die.during.first.instar.larval.stage	0.117721	0.00258236
decreased.cell.number	0.11107	0.00348054
lethal...all.die.during.embryonic.stage	0.0995557	0.00582553
lethal...all.die.during.pupal.stage	0.069344	0.0224497
some.die.during.pupal.stage	0.0676234	0.02425
small.body	0.0670538	0.0248776
large.body	0.0635857	0.029072
cell.death.defective	0.0614912	0.0319468
decreased.occurrence.of.cell.division	0.0614912	0.0319468
cell.lethal	0.0494093	0.055271
lethal...all.die.during.larval.stage	0.0325382	0.121463
cell.cycle.defective	0.028384	0.14849
lethal...all.die.during.first.instar.larval.stage	0.028384	0.14849
cell.growth.defective	0.0274856	0.155169
some.die.during.immature.adult.stage	0.0274856	0.155169
some.die.during.larval.stage	0.0248547	0.176742
male.sterile	0.0239348	0.185069
developmental.rate.defective	0.0182941	0.247272
partially.lethal	0.0175598	0.257075
female.semi.fertile	0.0146479	0.300977
increased.cell.death	0.0146479	0.300977
lethal...all.die.before.end.of.second.instar.larval.stage	0.010402	0.383919
partially.lethal...majority.live	0.00811409	0.442153
neuroanatomy.defectiveÂ.	0.00660503	0.488211
decreased.cell.size	0.00552577	0.526192
some.die.during.embryonic.stage	0.00275042	0.654975
female.sterile	0.00146097	0.744745
Minute	0.0010788	0.779674
female.fertile	0.000803849	0.809197
partially.lethal...majority.die	0.000498368	0.849223
pain.response.defective	0.000365029	0.870758
visible	0.000142883	0.918928
size.defective	0.000142338	0.919082
tumorigenic.progressive..spermatogenesis	2.02738e-05	0.969417
lethal...all.die.before.end.of.larval.stage	1.81515e-05	0.971061

## Sheet: fly_Dim7
	R2	p.value
non.suppressor.of.variegation	0.521893	2.55571e-13
suppressor.of.variegation	0.521893	2.55571e-13
lethal...all.die.before.end.of.first.instar.larval.stage	0.129546	0.00151546
some.die.during.first.instar.larval.stage	0.129546	0.00151546
hyperplasia	0.126961	0.0017032
large.body	0.0829072	0.0122447
partially.lethal...majority.die	0.0802376	0.0137939
visible	0.0796795	0.0141419
lethal...all.die.during.larval.stage	0.076061	0.0166223
partially.lethal	0.0741886	0.0180734
lethal...all.die.during.embryonic.stage	0.047723	0.0597113
short.lived	0.0451796	0.0671238
cell.cycle.defective	0.0411558	0.0808825
lethal...all.die.during.first.instar.larval.stage	0.0411558	0.0808825
female.semi.fertile	0.0410849	0.0811498
increased.cell.death	0.0410849	0.0811498
decreased.fecundity	0.0405464	0.0832125
some.die.during.larval.stage	0.0353561	0.106202
neuroanatomy.defectiveﾂ.	0.0330415	0.118572
male.sterile	0.0285488	0.1473
lethal...all.die.during.pupal.stage	0.0185839	0.243528
Minute	0.0158124	0.28238
pain.response.defective	0.0151215	0.293232
lethal...all.die.before.end.of.larval.stage	0.0145305	0.302937
partially.lethal...majority.live	0.0100562	0.39198
some.die.during.pupal.stage	0.00917515	0.413649
cell.death.defective	0.00677133	0.482768
decreased.occurrence.of.cell.division	0.00677133	0.482768
small.body	0.00533972	0.533259
developmental.rate.defective	0.00512018	0.54182
increased.cell.size	0.00509714	0.542733
cell.growth.defective	0.00498962	0.547031
some.die.during.immature.adult.stage	0.00498962	0.547031
some.die.during.embryonic.stage	0.00413746	0.583509
decreased.cell.number	0.00331677	0.623577
mitotic.cell.cycle.defective	0.00301219	0.640018
cell.lethal	0.00231498	0.681864
size.defective	0.00194249	0.707318
decreased.cell.size	0.0012819	0.760398
female.fertile	0.000202458	0.903563
tumorigenic.progressive..spermatogenesis	0.000143288	0.918814
female.sterile	4.28925e-05	0.955528
lethal...all.die.before.end.of.second.instar.larval.stage	6.08442e-06	0.983243

## Sheet: fly_Dim8
	R2	p.value
hyperplasia	0.270998	1.68846e-06
short.lived	0.176475	0.000175329
increased.cell.size	0.171489	0.000221315
some.die.during.pupal.stage	0.116373	0.00274363
decreased.cell.number	0.106777	0.00421843
large.body	0.0967981	0.00658882
size.defective	0.0897417	0.00902701
lethal...all.die.during.pupal.stage	0.0836039	0.0118699
lethal...all.die.before.end.of.first.instar.larval.stage	0.0779545	0.0152742
some.die.during.first.instar.larval.stage	0.0779545	0.0152742
partially.lethal	0.0725147	0.0194784
lethal...all.die.during.embryonic.stage	0.0695704	0.0222231
male.sterile	0.0634241	0.0292841
partially.lethal...majority.die	0.0538351	0.0451707
partially.lethal...majority.live	0.0515224	0.0501855
mitotic.cell.cycle.defective	0.0465159	0.0631168
some.die.during.larval.stage	0.0448483	0.0681577
cell.death.defective	0.0357941	0.104022
decreased.occurrence.of.cell.division	0.0357941	0.104022
decreased.cell.size	0.0357734	0.104124
female.semi.fertile	0.033283	0.117211
increased.cell.death	0.033283	0.117211
cell.growth.defective	0.0269174	0.159566
some.die.during.immature.adult.stage	0.0269174	0.159566
cell.cycle.defective	0.0256484	0.169898
lethal...all.die.during.first.instar.larval.stage	0.0256484	0.169898
developmental.rate.defective	0.0254411	0.171656
decreased.fecundity	0.0253263	0.172638
visible	0.0235519	0.188665
lethal...all.die.during.larval.stage	0.0192816	0.234788
lethal...all.die.before.end.of.larval.stage	0.0191257	0.236708
pain.response.defective	0.0165061	0.271982
some.die.during.embryonic.stage	0.0117633	0.354322
tumorigenic.progressive..spermatogenesis	0.00766081	0.455244
neuroanatomy.defectiveﾂ.	0.00509567	0.542792
non.suppressor.of.variegation	0.00483054	0.553507
suppressor.of.variegation	0.00483054	0.553507
small.body	0.00442596	0.570646
female.sterile	0.00437146	0.573033
female.fertile	0.00214618	0.693082
cell.lethal	0.00140177	0.749796
lethal...all.die.before.end.of.second.instar.larval.stage	0.000939124	0.794094
Minute	1.83951e-08	0.999079

[truncated: 1 more sheets: fly_genes_cos2]
