# Supplementary material for: Ribosomal proteins: mutant phenotypes by the numbers and associated gene expression changes
Source: Open Biol. 2020 Aug 19;10(8):200114. doi: 10.1098/rsob.200114 (PMC7479938; doi:10.1098/rsob.200114)
Supplement: Human ribosomal protein phenotypes [file rsob200114supp7.xlsx]

## Sheet: human_phenotypes
	Autism, susceptibility to, X-linked 5	Mental retardation, X-linked, syndromic, 35	Diamond-Blackfan anemia 7	Spondyloepimetaphyseal dysplasia, Isidor-Toutain type	Diamond-Blackfan anemia 12	Diamond-Blackfan anemia 18	Hypotrichosis 12	Diamond-Blackfan anemia 11	Diamond-Blackfan anemia 16	Diamond-Blackfan anemia 19	Diamond-Blackfan anemia 5	Diamond-Blackfan anemia 6	Diamond-Blackfan anemia 9	Macrocytic anemia, refractory	Diamond-Blackfan anemia 20	Diamond-Blackfan anemia 4	Diamond-Blackfan anemia 1	Brachycephaly, trichomegaly, and developmental delay	Diamond-blackfan anemia 3	Diamond-Blackfan anemia 10	Diamond-Blackfan anemia 17	Diamond Blackfan anemia 15 with mandibulofacial dysostosis	Diamond-Blackfan anemia 13	Diamond-Blackfan anemia 8	Asplenia, isolated congenital
RPL10	y	y	n	n	n	n	n	n	n	n	n	n	n	n	n	n	n	n	n	n	n	n	n	n	n
RPL11	n	n	y	n	n	n	n	n	n	n	n	n	n	n	n	n	n	n	n	n	n	n	n	n	n
RPL13	n	n	n	y	n	n	n	n	n	n	n	n	n	n	n	n	n	n	n	n	n	n	n	n	n
RPL15	n	n	n	n	y	n	n	n	n	n	n	n	n	n	n	n	n	n	n	n	n	n	n	n	n
RPL18	n	n	n	n	n	y	n	n	n	n	n	n	n	n	n	n	n	n	n	n	n	n	n	n	n
RPL21	n	n	n	n	n	n	y	n	n	n	n	n	n	n	n	n	n	n	n	n	n	n	n	n	n
RPL26	n	n	n	n	n	n	n	y	n	n	n	n	n	n	n	n	n	n	n	n	n	n	n	n	n
RPL27	n	n	n	n	n	n	n	n	y	n	n	n	n	n	n	n	n	n	n	n	n	n	n	n	n
RPL35	n	n	n	n	n	n	n	n	n	y	n	n	n	n	n	n	n	n	n	n	n	n	n	n	n
RPL35A	n	n	n	n	n	n	n	n	n	n	y	n	n	n	n	n	n	n	n	n	n	n	n	n	n
RPL5	n	n	n	n	n	n	n	n	n	n	n	y	n	n	n	n	n	n	n	n	n	n	n	n	n
RPS10	n	n	n	n	n	n	n	n	n	n	n	n	y	n	n	n	n	n	n	n	n	n	n	n	n
RPS14	n	n	n	n	n	n	n	n	n	n	n	n	n	y	n	n	n	n	n	n	n	n	n	n	n
RPS15A	n	n	n	n	n	n	n	n	n	n	n	n	n	n	y	n	n	n	n	n	n	n	n	n	n
RPS17	n	n	n	n	n	n	n	n	n	n	n	n	n	n	n	y	n	n	n	n	n	n	n	n	n
RPS19	n	n	n	n	n	n	n	n	n	n	n	n	n	n	n	n	y	n	n	n	n	n	n	n	n
RPS23	n	n	n	n	n	n	n	n	n	n	n	n	n	n	n	n	n	y	n	n	n	n	n	n	n
RPS24	n	n	n	n	n	n	n	n	n	n	n	n	n	n	n	n	n	n	y	n	n	n	n	n	n
RPS26	n	n	n	n	n	n	n	n	n	n	n	n	n	n	n	n	n	n	n	y	n	n	n	n	n
RPS27	n	n	n	n	n	n	n	n	n	n	n	n	n	n	n	n	n	n	n	n	y	n	n	n	n
RPS28	n	n	n	n	n	n	n	n	n	n	n	n	n	n	n	n	n	n	n	n	n	y	n	n	n
RPS29	n	n	n	n	n	n	n	n	n	n	n	n	n	n	n	n	n	n	n	n	n	n	y	n	n
RPS7	n	n	n	n	n	n	n	n	n	n	n	n	n	n	n	n	n	n	n	n	n	n	n	y	n
RPSA	n	n	n	n	n	n	n	n	n	n	n	n	n	n	n	n	n	n	n	n	n	n	n	n	y
