# Supplementary material for: Ribosomal proteins: mutant phenotypes by the numbers and associated gene expression changes
Source: Open Biol. 2020 Aug 19;10(8):200114. doi: 10.1098/rsob.200114 (PMC7479938; doi:10.1098/rsob.200114)
Supplement: Mouse MCA datasets [file rsob200114supp6.xlsx]

## Sheet: mouse_phenotypes
	preweaning lethality, complete penetrance	abnormal circulating glucose level	abnormal oxidative phosphorylation	abnormal redox activity	improved glucose tolerance	increased insulin secretion	increased oxygen consumption	decreased susceptibility to autoimmune diabetes	abnormal cytokine level	abnormal lung morphology	abnormal macrophage chemotaxis	hypoactivity	increased blood urea nitrogen level	increased circulating aspartate transaminase level	increased circulating tumor necrosis factor level	premature death	tachypnea	abnormal T cell differentiation	abnormal T cell number	arrested T cell differentiation	decreased CD4-positive, alpha beta T cell number	decreased CD8-positive, alpha-beta T cell number	decreased double-negative T cell number	decreased T cell number	glomerulonephritis	increased T cell apoptosis	thymus hypoplasia	abnormal thymus development	decreased B cell number	abnormal embryo development	embryonic lethality during organogenesis, complete penetrance	abnormal cell cycle	abnormal cell physiology	abnormal digit morphology	abnormal eye development	abnormal eye size	abnormal optic cup morphology	abnormal optic nerve morphology	abnormal retina morphology	abnormal retinal ganglion layer morphology	abnormal retinal inner plexiform layer morphology	abnormal retinal layer morphology	abnormal retinal neuronal layer morphology	abnormal retinal progenitor cell morphology	absent optic nerve	belly spot	cataract	caudal vertebral fusion	decreased body weight
Rpl12	y	n	n	n	n	n	n	n	n	n	n	n	n	n	n	n	n	n	n	n	n	n	n	n	n	n	n	n	n	n	n	n	n	n	n	n	n	n	n	n	n	n	n	n	n	n	n	n	n
Rpl13a	n	y	y	y	y	y	y	y	y	y	y	y	y	y	y	y	y	n	n	n	n	n	n	n	n	n	n	n	n	n	n	n	n	n	n	n	n	n	n	n	n	n	n	n	n	n	n	n	n
Rpl22	n	n	n	n	n	n	n	n	n	n	n	n	n	n	n	n	n	y	y	y	y	y	y	y	y	y	y	y	y	n	n	n	n	n	n	n	n	n	n	n	n	n	n	n	n	n	n	n	n
Rpl22l1	n	n	n	n	n	n	n	n	n	n	n	n	n	n	n	n	n	n	n	n	n	n	n	n	n	n	n	n	n	y	y	n	n	n	n	n	n	n	n	n	n	n	n	n	n	n	n	n	n
Rpl24	n	n	n	n	n	n	n	n	n	n	n	n	n	n	n	n	n	n	n	n	n	n	n	n	n	n	n	n	n	n	n	y	y	y	y	y	y	y	y	y	y	y	y	y	y	y	y	y	y
Rpl27a	n	n	n	n	n	n	n	n	n	n	n	n	n	n	n	n	n	n	n	n	n	n	n	n	n	n	n	n	n	n	n	n	n	n	n	n	n	n	n	n	n	n	n	n	n	n	n	n	y
Rpl29	n	n	n	n	n	n	n	n	n	n	n	n	n	n	n	n	n	n	n	n	n	n	n	n	n	n	n	n	n	n	n	y	n	n	n	n	n	n	n	n	n	n	n	n	n	n	n	n	y
Rpl31	n	n	n	n	n	n	n	n	n	n	n	n	n	n	n	n	n	n	n	n	n	n	n	n	n	n	n	n	n	n	n	n	n	n	n	n	n	n	n	n	n	n	n	n	n	n	n	n	n
Rpl32	n	n	n	n	n	n	n	n	n	n	n	n	n	n	n	n	n	n	n	n	n	n	n	n	n	n	n	n	n	n	n	n	n	n	n	n	n	n	n	n	n	n	n	n	n	n	n	n	n
Rpl38	n	n	n	n	n	n	n	n	n	n	n	n	n	n	n	n	n	n	n	n	n	n	n	n	n	n	n	n	n	n	n	n	n	y	n	n	n	n	n	n	n	n	n	n	n	y	n	y	y
Rpl5	n	n	n	n	n	n	n	n	n	n	n	n	n	n	n	n	n	n	n	n	n	n	n	n	n	n	n	n	n	n	y	n	n	n	n	n	n	n	n	n	n	n	n	n	n	n	n	n	n
Rpl7l1	y	n	n	n	n	n	n	n	n	n	n	n	n	n	n	n	n	n	n	n	n	n	n	n	n	n	n	n	n	n	n	n	n	n	n	n	n	n	n	n	n	n	n	n	n	n	n	n	n
Rplp1	n	n	n	n	n	n	n	n	n	n	n	n	n	n	n	n	n	n	n	n	n	n	n	n	n	n	n	n	n	n	n	n	n	n	n	n	n	n	n	n	n	n	n	n	n	n	n	n	n
Rps12	y	n	n	n	n	n	n	n	n	n	n	n	n	n	n	n	n	n	n	n	n	n	n	n	n	n	n	n	n	n	n	n	n	n	n	n	n	n	n	n	n	n	n	n	n	n	n	n	n
Rps14	n	n	n	n	n	n	n	n	n	n	n	n	n	n	n	n	n	n	n	n	n	n	n	n	n	n	n	n	n	n	n	y	n	n	n	n	n	n	n	n	n	n	n	n	n	n	n	n	n
Rps19	n	n	n	n	n	n	n	n	n	n	n	n	n	n	n	n	n	n	n	n	n	n	n	n	n	n	n	n	n	n	n	n	n	n	n	n	n	n	n	n	n	n	n	n	n	y	n	n	y
Rps20	n	n	n	n	n	n	n	n	n	n	n	n	n	n	n	n	n	n	n	n	n	n	n	n	n	n	n	n	n	n	n	n	n	n	n	n	n	n	n	n	n	n	n	n	n	n	n	n	n
Rps24	n	n	n	n	n	n	n	n	n	n	n	n	n	n	n	n	n	n	n	n	n	n	n	n	n	n	n	n	n	n	y	n	n	n	n	n	n	n	n	n	n	n	n	n	n	n	n	n	n
Rps26	n	n	n	n	n	n	n	n	n	n	n	n	n	n	n	n	n	n	n	n	n	n	n	n	n	n	n	n	n	n	n	n	n	n	n	n	n	n	n	n	n	n	n	n	n	n	n	n	n
Rps27l	n	n	n	n	n	n	n	n	n	n	n	n	n	n	n	y	n	n	n	n	n	n	n	n	n	n	y	n	n	n	n	n	n	n	n	n	n	n	n	n	n	n	n	n	n	n	n	n	y
Rps6	n	n	n	n	n	n	n	n	n	n	n	n	n	n	n	n	n	n	n	n	n	n	n	n	n	n	n	n	n	n	n	y	y	n	n	n	n	n	n	n	n	n	n	n	n	n	n	n	n
Rps7	n	n	n	n	n	n	n	n	n	n	n	n	n	n	n	y	n	n	n	n	n	n	n	n	n	n	n	n	n	n	n	n	n	n	n	n	n	n	n	n	n	n	n	n	n	y	n	n	n
Rpsa	n	n	n	n	n	n	n	n	n	n	n	n	n	n	n	n	n	n	n	n	n	n	n	n	n	n	n	n	n	n	n	n	n	n	n	n	n	n	n	n	n	n	n	n	n	n	n	n	n
[truncated: 240 more columns]

## Sheet: mouse_eigen
	eigenvalue	percentage of variance	cumulative percentage of variance
dim 1	0.0883001	64.6303	64.6303
dim 2	0.014664	10.7331	75.3634
dim 3	0.0100941	7.38827	82.7517
dim 4	0.00632873	4.63225	87.3839
dim 5	0.00470826	3.44616	90.8301
dim 6	0.00320244	2.34399	93.1741
dim 7	0.00258524	1.89224	95.0663
dim 8	0.00204237	1.49489	96.5612
dim 9	0.00163065	1.19354	97.7547
dim 10	0.00114903	0.841017	98.5957
dim 11	0.000894637	0.654819	99.2506
dim 12	0.000429325	0.31424	99.5648
dim 13	0.000302058	0.221088	99.7859
dim 14	0.00012378	0.0905992	99.8765
dim 15	7.37015e-05	0.053945	99.9304
dim 16	6.08887e-05	0.0445668	99.975
dim 17	1.99403e-05	0.0145951	99.9896
dim 18	8.96317e-06	0.00656049	99.9961
dim 19	3.24522e-06	0.0023753	99.9985
dim 20	2.01875e-06	0.0014776	100
dim 21	1.70424e-59	1.2474e-56	100
dim 22	1.14727e-62	8.39729e-60	100

## Sheet: mouse_Dim1
	R2	p.value
prenatal.lethality..incomplete.penetrance	0.990946	6.08459e-23
abnormal.cervical.atlas.morphology	0.990946	6.08459e-23
abnormal.cervical.vertebrae.morphology	0.990946	6.08459e-23
abnormal.cranium.morphology	0.990946	6.08459e-23
abnormal.rib.morphology	0.990946	6.08459e-23
abnormal.vertebral.lamina.morphology	0.990946	6.08459e-23
abnormal.vertebral.pedicle.morphology	0.990946	6.08459e-23
abnormal.vertebral.spinous.process.morphology	0.990946	6.08459e-23
caudal.vertebral.transformation	0.990946	6.08459e-23
cervical.vertebral.fusion	0.990946	6.08459e-23
sacral.vertebral.transformation	0.990946	6.08459e-23
vertebral.transformation	0.990946	6.08459e-23
embryonic.lethality.between.implantation.and.somite.formation..complete.penetrance	0.990946	6.08459e-23
abnormal.forelimb.morphology	0.990946	6.08459e-23
abnormal.nasal.bone.morphology	0.990946	6.08459e-23
absent.caudal.vertebrae	0.990946	6.08459e-23
absent.tail	0.990946	6.08459e-23
decreased.body.length	0.990946	6.08459e-23
decreased.cranium.height	0.990946	6.08459e-23
incomplete.rostral.neuropore.closure	0.990946	6.08459e-23
increased.cranium.width	0.990946	6.08459e-23
irregular.coat.pigmentation	0.990946	6.08459e-23
oligodactyly	0.990946	6.08459e-23
perinatal.lethality..incomplete.penetrance	0.990946	6.08459e-23
reduced.fertility	0.990946	6.08459e-23
spina.bifida	0.990946	6.08459e-23
abnormal.autopod.morphology	0.990946	6.08459e-23
abnormal.heart.development	0.990946	6.08459e-23
abnormal.humerus.morphology	0.990946	6.08459e-23
abnormal.metacarpal.bone.morphology	0.990946	6.08459e-23
abnormal.metatarsal.bone.morphology	0.990946	6.08459e-23
abnormal.nasal.cavity.morphology	0.990946	6.08459e-23
abnormal.neural.tube.morphology	0.990946	6.08459e-23
abnormal.neuromere.morphology	0.990946	6.08459e-23
abnormal.notochord.morphology	0.990946	6.08459e-23
abnormal.olfactory.bulb.morphology	0.990946	6.08459e-23
abnormal.placenta.vasculature	0.990946	6.08459e-23
abnormal.sacral.vertebrae.morphology	0.990946	6.08459e-23
abnormal.vertebrae.development	0.990946	6.08459e-23
abnormal.vitelline.vasculature.morphology	0.990946	6.08459e-23
decreased.length.of.long.bones	0.990946	6.08459e-23
increased.sternebra.number	0.990946	6.08459e-23
increased.thoracic.vertebrae.number	0.990946	6.08459e-23
rib.fusion	0.990946	6.08459e-23
short.femur	0.990946	6.08459e-23
short.humerus	0.990946	6.08459e-23
short.radius	0.990946	6.08459e-23
short.snout	0.990946	6.08459e-23
short.tibia	0.990946	6.08459e-23
small.caudal.vertebrae	0.990946	6.08459e-23
sternebra.fusion	0.990946	6.08459e-23
wavy.neural.tube	0.990946	6.08459e-23
abnormal.auditory.tube.morphology	0.990946	6.08459e-23
abnormal.distortion.product.otoacoustic.emission	0.990946	6.08459e-23
abnormal.embryonic.erythropoiesis	0.990946	6.08459e-23
abnormal.hearing.physiology	0.990946	6.08459e-23
abnormal.middle.ear.morphology	0.990946	6.08459e-23
abnormal.oval.window.morphology	0.990946	6.08459e-23
abnormal.round.window.morphology	0.990946	6.08459e-23
anencephaly	0.990946	6.08459e-23
conductive.hearing.loss	0.990946	6.08459e-23
increased.circulating.phosphate.level	0.990946	6.08459e-23
increased.or.absent.threshold.for.auditory.brainstem.response	0.990946	6.08459e-23
increased.susceptibility.to.otitis.media	0.990946	6.08459e-23
omphalocele	0.990946	6.08459e-23
abnormal.blastocoele.morphology	0.990946	6.08459e-23
abnormal.blastocyst.morphology	0.990946	6.08459e-23
abnormal.nucleolus.morphology	0.990946	6.08459e-23
abnormal.preimplantation.embryo.development	0.990946	6.08459e-23
absent.blastocoele	0.990946	6.08459e-23
embryonic.growth.arrest	0.990946	6.08459e-23
embryonic.lethality.at.implantation..incomplete.penetrance	0.990946	6.08459e-23
cleft.palate	0.990946	6.08459e-23
cleft.upper.lip	0.990946	6.08459e-23
herniated.abdominal.wall	0.990946	6.08459e-23
abnormal.vertebral.arch.morphology	0.545582	5.70054e-05
abnormal.vertebral.transverse.process.morphology	0.545582	5.70054e-05
asymmetric.sternocostal.joints	0.545582	5.70054e-05
increased.rib.number	0.545582	5.70054e-05
lumbar.vertebral.transformation	0.545582	5.70054e-05
abnormal.sternebra.morphology	0.545582	5.70054e-05
curly.tail	0.545582	5.70054e-05
vertebral.fusion	0.545582	5.70054e-05
abnormal.digit.morphology	0.528978	8.4206e-05
caudal.vertebral.fusion	0.528978	8.4206e-05
decreased.embryo.size	0.528978	8.4206e-05
exencephaly	0.528978	8.4206e-05
polydactyly	0.528978	8.4206e-05
abnormal.tail.morphology	0.474218	0.000279977
postnatal.lethality..complete.penetrance	0.465738	0.00033373
decreased.caudal.vertebrae.number	0.389019	0.00147211
embryonic.growth.retardation	0.35119	0.00288467
anemia	0.295455	0.00734586
postnatal.growth.retardation	0.293628	0.0075669
belly.spot	0.284232	0.00880541
decreased.body.size	0.249787	0.015168
short.tail	0.242912	0.0168727
increased.apoptosis	0.240797	0.0174326
kinked.tail	0.216524	0.0252556
prenatal.lethality..complete.penetrance	0.179693	0.0438219
embryonic.lethality..complete.penetrance	0.179693	0.0438219
decreased.body.weight	0.142453	0.0758183
increased.ear.pigmentation	0.0130302	0.604029
increased.foot.pad.pigmentation	0.0130302	0.604029
increased.tail.pigmentation	0.0130302	0.604029
postnatal.lethality..incomplete.penetrance	0.0109291	0.634992
abnormal.epidermal.pigmentation	0.00863731	0.673193
preweaning.lethality..complete.penetrance	0.00863434	0.673246
embryonic.lethality.during.organogenesis..complete.penetrance	0.00848757	0.675887
decreased.erythrocyte.cell.number	0.00806372	0.683666
abnormal.epidermal.melanocyte.morphology	0.00798124	0.685207
abnormal.pancreatic.beta.cell.morphology	0.00743381	0.695675
abnormal.bone.marrow.cell.physiology	0.00662074	0.712069
abnormal.cell.cycle	0.00658413	0.712834
decreased.bone.marrow.cell.number	0.00647776	0.715068
decreased.hematopoietic.stem.cell.number	0.00647776	0.715068
thymus.hypoplasia	0.0064389	0.71589
enlarged.spleen	0.00591505	0.727245
small.thymus	0.0055205	0.736173
abnormal.hematopoietic.system.morphology.development	0.00501085	0.748244
impaired.hematopoiesis	0.00500201	0.74846
embryonic.lethality.before.implantation..complete.penetrance	0.00459165	0.758688
darkened.coat.color	0.00417666	0.769551
abnormal.dermal.pigmentation	0.00417666	0.769551
decreased.skin.pigmentation	0.00417666	0.769551
decreased.tail.pigmentation	0.00417666	0.769551
reduced.foot.pad.pigmentation	0.00417666	0.769551
abnormal.cell.morphology	0.00417666	0.769551
decreased.liver.regeneration	0.00417666	0.769551
abnormal.hepatocyte.morphology	0.00417666	0.769551
abnormal.pancreatic.islet.morphology	0.00417666	0.769551
decreased.circulating.insulin.level	0.00417666	0.769551
decreased.insulin.secretion	0.00417666	0.769551
impaired.glucose.tolerance	0.00417666	0.769551
increased.insulin.sensitivity	0.00417666	0.769551
abnormal.skin.pigmentation	0.00413546	0.770661
increased.melanocyte.number	0.00413546	0.770661
abnormal.circulating.glucose.level	0.00377551	0.780621
abnormal.oxidative.phosphorylation	0.00377551	0.780621
abnormal.redox.activity	0.00377551	0.780621
improved.glucose.tolerance	0.00377551	0.780621
increased.insulin.secretion	0.00377551	0.780621
increased.oxygen.consumption	0.00377551	0.780621
decreased.susceptibility.to.autoimmune.diabetes	0.00377551	0.780621
abnormal.cytokine.level	0.00377551	0.780621
abnormal.lung.morphology	0.00377551	0.780621
abnormal.macrophage.chemotaxis	0.00377551	0.780621
hypoactivity	0.00377551	0.780621
increased.blood.urea.nitrogen.level	0.00377551	0.780621
increased.circulating.aspartate.transaminase.level	0.00377551	0.780621
increased.circulating.tumor.necrosis.factor.level	0.00377551	0.780621
tachypnea	0.00377551	0.780621
abnormal.cerebellar.granule.layer.morphology	0.00344368	0.790264
abnormal.cerebellar.layer.morphology	0.00344368	0.790264
abnormal.cerebellum.external.granule.cell.layer.morphology	0.00344368	0.790264
abnormal.Purkinje.cell.morphology	0.00344368	0.790264
abnormal.survival	0.00344368	0.790264
abnormal.tumor.incidence	0.00344368	0.790264
ataxia	0.00344368	0.790264
decreased.cerebellar.granule.cell.number	0.00344368	0.790264
decreased.hematopoietic.cell.number	0.00344368	0.790264
decreased.leukocyte.cell.number	0.00344368	0.790264
decreased.lymphoma.incidence	0.00344368	0.790264
ectopic.Purkinje.cell	0.00344368	0.790264
hyperpigmentation	0.00344368	0.790264
impaired.coordination	0.00344368	0.790264
increased.hematopoietic.stem.cell.proliferation	0.00344368	0.790264
increased.metastatic.potential	0.00344368	0.790264
increased.mortality.induced.by.gamma.irradiation	0.00344368	0.790264
increased.tumor.latency	0.00344368	0.790264
pancytopenia	0.00344368	0.790264
small.cerebellum	0.00344368	0.790264
small.spleen	0.00344368	0.790264
thin.external.granule.cell.layer	0.00344368	0.790264
thrombocytopenia	0.00344368	0.790264
abnormal.T.cell.differentiation	0.00340458	0.791433
abnormal.T.cell.number	0.00340458	0.791433
arrested.T.cell.differentiation	0.00340458	0.791433
decreased.CD4.positive..alpha.beta.T.cell.number	0.00340458	0.791433
decreased.CD8.positive..alpha.beta.T.cell.number	0.00340458	0.791433
decreased.double.negative.T.cell.number	0.00340458	0.791433
decreased.T.cell.number	0.00340458	0.791433
glomerulonephritis	0.00340458	0.791433
increased.T.cell.apoptosis	0.00340458	0.791433
abnormal.thymus.development	0.00340458	0.791433
decreased.B.cell.number	0.00340458	0.791433
abnormal.craniofacial.development	0.00297051	0.804915
decreased.mean.corpuscular.hemoglobin.concentration	0.00297051	0.804915
fetal.growth.retardation	0.00297051	0.804915
heart.right.ventricle.degeneration	0.00297051	0.804915
irregular.heartbeat	0.00297051	0.804915
premature.death	0.00289519	0.807358
abnormal.bone.marrow.morphology	0.00288832	0.807583
abnormal.erythroid.progenitor.cell.morphology	0.00288832	0.807583
abnormal.megakaryocyte.morphology	0.00288832	0.807583
abnormal.platelet.shape	0.00288832	0.807583
abnormal.translation	0.00288832	0.807583
decreased.telomere.length	0.00288832	0.807583
thrombocytosis	0.00288832	0.807583
abnormal.hematopoietic.stem.cell.physiology	0.00275861	0.811876
aneuploidy	0.00275861	0.811876
chromosomal.instability	0.00275861	0.811876
decreased.common.myeloid.progenitor.cell.number	0.00275861	0.811876
decreased.spleen.weight	0.00275861	0.811876
decreased.thymus.weight	0.00275861	0.811876
enlarged.liver	0.00275861	0.811876
enlarged.lymph.nodes	0.00275861	0.811876
increased.B.cell.derived.lymphoma.incidence	0.00275861	0.811876
increased.lymphoma.incidence	0.00275861	0.811876
increased.T.cell.derived.lymphoma.incidence	0.00275861	0.811876
increased.thymocyte.apoptosis	0.00275861	0.811876
liver.hypoplasia	0.00275861	0.811876
small.liver	0.00275861	0.811876
spleen.hypoplasia	0.00275861	0.811876
thymus.cortex.hypoplasia	0.00275861	0.811876
abnormal.coat.appearance	0.00274868	0.812209
abnormal.coat..hair.morphology	0.00274868	0.812209
embryonic.lethality.prior.to.organogenesis	0.00274868	0.812209
abnormal.embryo.development	0.00261425	0.816782
increased.startle.reflex	0.00254442	0.819205
abnormal.testis.morphology	0.00201532	0.838829
hydrocephaly	0.00201532	0.838829
abnormal.adipose.tissue.development	0.00193401	0.842073
abnormal.intestine.morphology	0.00193401	0.842073
abnormal.liver.morphology	0.00193401	0.842073
abnormal.skin.coloration	0.00193401	0.842073
abnormal.tail.position.or.orientation	0.00193401	0.842073
decreased.birth.body.size	0.00193401	0.842073
decreased.erythroblast.number	0.00193401	0.842073
male.infertility	0.00193401	0.842073
decreased.fibroblast.proliferation	0.00175588	0.849437
delayed.bone.ossification	0.00175588	0.849437
preweaning.lethality..incomplete.penetrance	0.00175588	0.849437
delayed.sexual.maturation	0.00175588	0.849437
abnormal.cell.physiology	0.00159426	0.85646
decreased.birth.weight	0.00153068	0.859324
decreased.erythroid.progenitor.cell.number	0.00153068	0.859324
decreased.hematocrit	0.00153068	0.859324
decreased.hemoglobin.content	0.00153068	0.859324
embryonic.lethality.during.organogenesis..incomplete.penetrance	0.00153068	0.859324
reticulocytopenia	0.00153068	0.859324
abnormal.melanoblast.morphology	0.00148994	0.86119
abnormal.bone.ossification	0.000630427	0.909462
abnormal.cerebral.cortex.morphology	0.000630427	0.909462
abnormal.hindbrain.morphology	0.000630427	0.909462
abnormal.spatial.working.memory	0.000630427	0.909462
cervical.vertebral.transformation	0.000630427	0.909462
decreased.neural.crest.cell.number	0.000630427	0.909462
decreased.vertebrae.number	0.000630427	0.909462
enlarged.brain.ventricles	0.000630427	0.909462
hypopigmentation	0.000630427	0.909462
increased.mean.corpuscular.volume	0.000630427	0.909462
increased.neuron.apoptosis	0.000630427	0.909462
microphthalmia	0.000630427	0.909462
perinatal.lethality	0.000630427	0.909462
small.hippocampus	0.000630427	0.909462
thin.cerebral.cortex	0.000630427	0.909462
uveal.coloboma	0.000630427	0.909462
delayed.optic.fissure.closure	0.000625873	0.909788
abnormal.erythropoiesis	0.000102895	0.963361
abnormal.eye.development	8.94589e-05	0.965836
abnormal.eye.size	8.94589e-05	0.965836
abnormal.optic.cup.morphology	8.94589e-05	0.965836
abnormal.optic.nerve.morphology	8.94589e-05	0.965836
abnormal.retina.morphology	8.94589e-05	0.965836
abnormal.retinal.ganglion.layer.morphology	8.94589e-05	0.965836
abnormal.retinal.inner.plexiform.layer.morphology	8.94589e-05	0.965836
abnormal.retinal.layer.morphology	8.94589e-05	0.965836
abnormal.retinal.neuronal.layer.morphology	8.94589e-05	0.965836
abnormal.retinal.progenitor.cell.morphology	8.94589e-05	0.965836
absent.optic.nerve	8.94589e-05	0.965836
cataract	8.94589e-05	0.965836
decreased.retinal.ganglion.cell.number	8.94589e-05	0.965836
disorganized.retinal.inner.nuclear.layer	8.94589e-05	0.965836
disorganized.retinal.outer.nuclear.layer	8.94589e-05	0.965836
embryonic.lethality..incomplete.penetrance	8.94589e-05	0.965836
impaired.pupillary.reflex	8.94589e-05	0.965836
increased.lumbar.vertebrae.number	8.94589e-05	0.965836
optic.nerve.atrophy	8.94589e-05	0.965836
optic.nerve.coloboma	8.94589e-05	0.965836
optic.nerve.hypoplasia	8.94589e-05	0.965836
pathological.neovascularization	8.94589e-05	0.965836
persistence.of.hyaloid.vascular.system	8.94589e-05	0.965836
retina.hypoplasia	8.94589e-05	0.965836
retinal.detachment	8.94589e-05	0.965836
retinal.neovascularization	8.94589e-05	0.965836
thin.retinal.ganglion.layer	8.94589e-05	0.965836
thin.retinal.inner.nuclear.layer	8.94589e-05	0.965836
white.spotting	8.94589e-05	0.965836

## Sheet: mouse_Dim2
	R2	p.value
abnormal.eye.development	0.972239	7.89472e-18
abnormal.eye.size	0.972239	7.89472e-18
abnormal.optic.cup.morphology	0.972239	7.89472e-18
abnormal.optic.nerve.morphology	0.972239	7.89472e-18
abnormal.retina.morphology	0.972239	7.89472e-18
abnormal.retinal.ganglion.layer.morphology	0.972239	7.89472e-18
abnormal.retinal.inner.plexiform.layer.morphology	0.972239	7.89472e-18
abnormal.retinal.layer.morphology	0.972239	7.89472e-18
abnormal.retinal.neuronal.layer.morphology	0.972239	7.89472e-18
abnormal.retinal.progenitor.cell.morphology	0.972239	7.89472e-18
absent.optic.nerve	0.972239	7.89472e-18
cataract	0.972239	7.89472e-18
decreased.retinal.ganglion.cell.number	0.972239	7.89472e-18
disorganized.retinal.inner.nuclear.layer	0.972239	7.89472e-18
disorganized.retinal.outer.nuclear.layer	0.972239	7.89472e-18
embryonic.lethality..incomplete.penetrance	0.972239	7.89472e-18
impaired.pupillary.reflex	0.972239	7.89472e-18
increased.lumbar.vertebrae.number	0.972239	7.89472e-18
optic.nerve.atrophy	0.972239	7.89472e-18
optic.nerve.coloboma	0.972239	7.89472e-18
optic.nerve.hypoplasia	0.972239	7.89472e-18
pathological.neovascularization	0.972239	7.89472e-18
persistence.of.hyaloid.vascular.system	0.972239	7.89472e-18
retina.hypoplasia	0.972239	7.89472e-18
retinal.detachment	0.972239	7.89472e-18
retinal.neovascularization	0.972239	7.89472e-18
thin.retinal.ganglion.layer	0.972239	7.89472e-18
thin.retinal.inner.nuclear.layer	0.972239	7.89472e-18
white.spotting	0.972239	7.89472e-18
delayed.optic.fissure.closure	0.494514	0.000181916
abnormal.cell.physiology	0.47898	0.000253389
abnormal.digit.morphology	0.451246	0.000447952
caudal.vertebral.fusion	0.451246	0.000447952
decreased.embryo.size	0.451246	0.000447952
exencephaly	0.451246	0.000447952
polydactyly	0.451246	0.000447952
decreased.caudal.vertebrae.number	0.306155	0.00616762
abnormal.cell.cycle	0.235416	0.0189373
short.tail	0.222043	0.0232279
belly.spot	0.21947	0.0241532
increased.apoptosis	0.212773	0.0267289
kinked.tail	0.181393	0.0427316
prenatal.lethality..complete.penetrance	0.104682	0.132071
embryonic.lethality..complete.penetrance	0.104682	0.132071
decreased.body.weight	0.0699798	0.22254
decreased.bone.marrow.cell.number	0.0437009	0.338425
decreased.hematopoietic.stem.cell.number	0.0437009	0.338425
postnatal.lethality..incomplete.penetrance	0.038815	0.367568
abnormal.cerebellar.granule.layer.morphology	0.037576	0.37548
abnormal.cerebellar.layer.morphology	0.037576	0.37548
abnormal.cerebellum.external.granule.cell.layer.morphology	0.037576	0.37548
abnormal.Purkinje.cell.morphology	0.037576	0.37548
abnormal.survival	0.037576	0.37548
abnormal.tumor.incidence	0.037576	0.37548
ataxia	0.037576	0.37548
decreased.cerebellar.granule.cell.number	0.037576	0.37548
decreased.hematopoietic.cell.number	0.037576	0.37548
decreased.leukocyte.cell.number	0.037576	0.37548
decreased.lymphoma.incidence	0.037576	0.37548
ectopic.Purkinje.cell	0.037576	0.37548
hyperpigmentation	0.037576	0.37548
impaired.coordination	0.037576	0.37548
increased.hematopoietic.stem.cell.proliferation	0.037576	0.37548
increased.metastatic.potential	0.037576	0.37548
increased.mortality.induced.by.gamma.irradiation	0.037576	0.37548
increased.tumor.latency	0.037576	0.37548
pancytopenia	0.037576	0.37548
small.cerebellum	0.037576	0.37548
small.spleen	0.037576	0.37548
thin.external.granule.cell.layer	0.037576	0.37548
thrombocytopenia	0.037576	0.37548
anemia	0.031855	0.415188
abnormal.hematopoietic.system.morphology.development	0.0293926	0.434111
postnatal.growth.retardation	0.0284156	0.441968
abnormal.epidermal.melanocyte.morphology	0.027478	0.449709
small.thymus	0.0272652	0.451494
decreased.erythrocyte.cell.number	0.026862	0.454906
increased.ear.pigmentation	0.0266679	0.456562
increased.foot.pad.pigmentation	0.0266679	0.456562
increased.tail.pigmentation	0.0266679	0.456562
abnormal.bone.marrow.cell.physiology	0.0257273	0.464721
decreased.body.size	0.0128008	0.607252
postnatal.lethality..complete.penetrance	0.0122398	0.615288
thymus.hypoplasia	0.010901	0.635429
premature.death	0.0104192	0.643044
abnormal.hematopoietic.stem.cell.physiology	0.0090241	0.666358
aneuploidy	0.0090241	0.666358
chromosomal.instability	0.0090241	0.666358
decreased.common.myeloid.progenitor.cell.number	0.0090241	0.666358
decreased.spleen.weight	0.0090241	0.666358
decreased.thymus.weight	0.0090241	0.666358
enlarged.liver	0.0090241	0.666358
enlarged.lymph.nodes	0.0090241	0.666358
increased.B.cell.derived.lymphoma.incidence	0.0090241	0.666358
increased.lymphoma.incidence	0.0090241	0.666358
increased.T.cell.derived.lymphoma.incidence	0.0090241	0.666358
increased.thymocyte.apoptosis	0.0090241	0.666358
liver.hypoplasia	0.0090241	0.666358
small.liver	0.0090241	0.666358
spleen.hypoplasia	0.0090241	0.666358
thymus.cortex.hypoplasia	0.0090241	0.666358
enlarged.spleen	0.00789518	0.686825
abnormal.tail.morphology	0.00444997	0.762334
abnormal.epidermal.pigmentation	0.00441061	0.763359
embryonic.growth.retardation	0.00358832	0.786002
preweaning.lethality..complete.penetrance	0.0035825	0.786172
embryonic.lethality.before.implantation..complete.penetrance	0.00352569	0.787836
abnormal.circulating.glucose.level	0.00350311	0.788502
abnormal.oxidative.phosphorylation	0.00350311	0.788502
abnormal.redox.activity	0.00350311	0.788502
improved.glucose.tolerance	0.00350311	0.788502
increased.insulin.secretion	0.00350311	0.788502
increased.oxygen.consumption	0.00350311	0.788502
decreased.susceptibility.to.autoimmune.diabetes	0.00350311	0.788502
abnormal.cytokine.level	0.00350311	0.788502
abnormal.lung.morphology	0.00350311	0.788502
abnormal.macrophage.chemotaxis	0.00350311	0.788502
hypoactivity	0.00350311	0.788502
increased.blood.urea.nitrogen.level	0.00350311	0.788502
increased.circulating.aspartate.transaminase.level	0.00350311	0.788502
increased.circulating.tumor.necrosis.factor.level	0.00350311	0.788502
tachypnea	0.00350311	0.788502
embryonic.lethality.during.organogenesis..complete.penetrance	0.00342252	0.790896
prenatal.lethality..incomplete.penetrance	0.00334863	0.793117
abnormal.cervical.atlas.morphology	0.00334863	0.793117
abnormal.cervical.vertebrae.morphology	0.00334863	0.793117
abnormal.cranium.morphology	0.00334863	0.793117
abnormal.rib.morphology	0.00334863	0.793117
abnormal.vertebral.lamina.morphology	0.00334863	0.793117
abnormal.vertebral.pedicle.morphology	0.00334863	0.793117
abnormal.vertebral.spinous.process.morphology	0.00334863	0.793117
caudal.vertebral.transformation	0.00334863	0.793117
cervical.vertebral.fusion	0.00334863	0.793117
sacral.vertebral.transformation	0.00334863	0.793117
vertebral.transformation	0.00334863	0.793117
embryonic.lethality.between.implantation.and.somite.formation..complete.penetrance	0.00334863	0.793117
abnormal.forelimb.morphology	0.00334863	0.793117
abnormal.nasal.bone.morphology	0.00334863	0.793117
absent.caudal.vertebrae	0.00334863	0.793117
absent.tail	0.00334863	0.793117
decreased.body.length	0.00334863	0.793117
decreased.cranium.height	0.00334863	0.793117
incomplete.rostral.neuropore.closure	0.00334863	0.793117
increased.cranium.width	0.00334863	0.793117
irregular.coat.pigmentation	0.00334863	0.793117
oligodactyly	0.00334863	0.793117
perinatal.lethality..incomplete.penetrance	0.00334863	0.793117
reduced.fertility	0.00334863	0.793117
spina.bifida	0.00334863	0.793117
abnormal.autopod.morphology	0.00334863	0.793117
abnormal.heart.development	0.00334863	0.793117
abnormal.humerus.morphology	0.00334863	0.793117
abnormal.metacarpal.bone.morphology	0.00334863	0.793117
abnormal.metatarsal.bone.morphology	0.00334863	0.793117
abnormal.nasal.cavity.morphology	0.00334863	0.793117
abnormal.neural.tube.morphology	0.00334863	0.793117
abnormal.neuromere.morphology	0.00334863	0.793117
abnormal.notochord.morphology	0.00334863	0.793117
abnormal.olfactory.bulb.morphology	0.00334863	0.793117
abnormal.placenta.vasculature	0.00334863	0.793117
abnormal.sacral.vertebrae.morphology	0.00334863	0.793117
abnormal.vertebrae.development	0.00334863	0.793117
abnormal.vitelline.vasculature.morphology	0.00334863	0.793117
decreased.length.of.long.bones	0.00334863	0.793117
increased.sternebra.number	0.00334863	0.793117
increased.thoracic.vertebrae.number	0.00334863	0.793117
rib.fusion	0.00334863	0.793117
short.femur	0.00334863	0.793117
short.humerus	0.00334863	0.793117
short.radius	0.00334863	0.793117
short.snout	0.00334863	0.793117
short.tibia	0.00334863	0.793117
small.caudal.vertebrae	0.00334863	0.793117
sternebra.fusion	0.00334863	0.793117
wavy.neural.tube	0.00334863	0.793117
abnormal.auditory.tube.morphology	0.00334863	0.793117
abnormal.distortion.product.otoacoustic.emission	0.00334863	0.793117
abnormal.embryonic.erythropoiesis	0.00334863	0.793117
abnormal.hearing.physiology	0.00334863	0.793117
abnormal.middle.ear.morphology	0.00334863	0.793117
abnormal.oval.window.morphology	0.00334863	0.793117
abnormal.round.window.morphology	0.00334863	0.793117
anencephaly	0.00334863	0.793117
conductive.hearing.loss	0.00334863	0.793117
increased.circulating.phosphate.level	0.00334863	0.793117
increased.or.absent.threshold.for.auditory.brainstem.response	0.00334863	0.793117
increased.susceptibility.to.otitis.media	0.00334863	0.793117
omphalocele	0.00334863	0.793117
abnormal.blastocoele.morphology	0.00334863	0.793117
abnormal.blastocyst.morphology	0.00334863	0.793117
abnormal.nucleolus.morphology	0.00334863	0.793117
abnormal.preimplantation.embryo.development	0.00334863	0.793117
absent.blastocoele	0.00334863	0.793117
embryonic.growth.arrest	0.00334863	0.793117
embryonic.lethality.at.implantation..incomplete.penetrance	0.00334863	0.793117
cleft.palate	0.00334863	0.793117
cleft.upper.lip	0.00334863	0.793117
herniated.abdominal.wall	0.00334863	0.793117
abnormal.skin.pigmentation	0.00334452	0.793241
increased.melanocyte.number	0.00334452	0.793241
abnormal.melanoblast.morphology	0.00326019	0.79581
abnormal.vertebral.arch.morphology	0.00273474	0.812678
abnormal.vertebral.transverse.process.morphology	0.00273474	0.812678
asymmetric.sternocostal.joints	0.00273474	0.812678
increased.rib.number	0.00273474	0.812678
lumbar.vertebral.transformation	0.00273474	0.812678
abnormal.sternebra.morphology	0.00273474	0.812678
curly.tail	0.00273474	0.812678
vertebral.fusion	0.00273474	0.812678
abnormal.pancreatic.beta.cell.morphology	0.00247765	0.821556
abnormal.T.cell.differentiation	0.00242706	0.823359
abnormal.T.cell.number	0.00242706	0.823359
arrested.T.cell.differentiation	0.00242706	0.823359
decreased.CD4.positive..alpha.beta.T.cell.number	0.00242706	0.823359
decreased.CD8.positive..alpha.beta.T.cell.number	0.00242706	0.823359
decreased.double.negative.T.cell.number	0.00242706	0.823359
decreased.T.cell.number	0.00242706	0.823359
glomerulonephritis	0.00242706	0.823359
increased.T.cell.apoptosis	0.00242706	0.823359
abnormal.thymus.development	0.00242706	0.823359
decreased.B.cell.number	0.00242706	0.823359
impaired.hematopoiesis	0.00201862	0.838699
decreased.birth.weight	0.00185217	0.845411
decreased.erythroid.progenitor.cell.number	0.00185217	0.845411
decreased.hematocrit	0.00185217	0.845411
decreased.hemoglobin.content	0.00185217	0.845411
embryonic.lethality.during.organogenesis..incomplete.penetrance	0.00185217	0.845411
reticulocytopenia	0.00185217	0.845411
abnormal.erythropoiesis	0.00172734	0.850652
abnormal.craniofacial.development	0.00152139	0.859747
decreased.mean.corpuscular.hemoglobin.concentration	0.00152139	0.859747
fetal.growth.retardation	0.00152139	0.859747
heart.right.ventricle.degeneration	0.00152139	0.859747
irregular.heartbeat	0.00152139	0.859747
abnormal.coat.appearance	0.00122795	0.873879
abnormal.coat..hair.morphology	0.00122795	0.873879
embryonic.lethality.prior.to.organogenesis	0.00122795	0.873879
abnormal.adipose.tissue.development	0.0011767	0.876519
abnormal.intestine.morphology	0.0011767	0.876519
abnormal.liver.morphology	0.0011767	0.876519
abnormal.skin.coloration	0.0011767	0.876519
abnormal.tail.position.or.orientation	0.0011767	0.876519
decreased.birth.body.size	0.0011767	0.876519
decreased.erythroblast.number	0.0011767	0.876519
male.infertility	0.0011767	0.876519
abnormal.embryo.development	0.0010797	0.881682
increased.startle.reflex	0.00100921	0.885584
darkened.coat.color	0.000886275	0.892738
abnormal.dermal.pigmentation	0.000886275	0.892738
decreased.skin.pigmentation	0.000886275	0.892738
decreased.tail.pigmentation	0.000886275	0.892738
reduced.foot.pad.pigmentation	0.000886275	0.892738
abnormal.cell.morphology	0.000886275	0.892738
decreased.liver.regeneration	0.000886275	0.892738
abnormal.hepatocyte.morphology	0.000886275	0.892738
abnormal.pancreatic.islet.morphology	0.000886275	0.892738
decreased.circulating.insulin.level	0.000886275	0.892738
decreased.insulin.secretion	0.000886275	0.892738
impaired.glucose.tolerance	0.000886275	0.892738
increased.insulin.sensitivity	0.000886275	0.892738
abnormal.bone.marrow.morphology	0.000771468	0.899889
abnormal.erythroid.progenitor.cell.morphology	0.000771468	0.899889
abnormal.megakaryocyte.morphology	0.000771468	0.899889
abnormal.platelet.shape	0.000771468	0.899889
abnormal.translation	0.000771468	0.899889
decreased.telomere.length	0.000771468	0.899889
thrombocytosis	0.000771468	0.899889
decreased.fibroblast.proliferation	0.000711305	0.903854
delayed.bone.ossification	0.000711305	0.903854
preweaning.lethality..incomplete.penetrance	0.000711305	0.903854
delayed.sexual.maturation	0.000711305	0.903854
abnormal.testis.morphology	0.000325163	0.934914
hydrocephaly	0.000325163	0.934914
abnormal.bone.ossification	0.000207022	0.948048
abnormal.cerebral.cortex.morphology	0.000207022	0.948048
abnormal.hindbrain.morphology	0.000207022	0.948048
abnormal.spatial.working.memory	0.000207022	0.948048
cervical.vertebral.transformation	0.000207022	0.948048
decreased.neural.crest.cell.number	0.000207022	0.948048
decreased.vertebrae.number	0.000207022	0.948048
enlarged.brain.ventricles	0.000207022	0.948048
hypopigmentation	0.000207022	0.948048
increased.mean.corpuscular.volume	0.000207022	0.948048
increased.neuron.apoptosis	0.000207022	0.948048
microphthalmia	0.000207022	0.948048
perinatal.lethality	0.000207022	0.948048
small.hippocampus	0.000207022	0.948048
thin.cerebral.cortex	0.000207022	0.948048
uveal.coloboma	0.000207022	0.948048

## Sheet: mouse_Dim3
	R2	p.value
abnormal.cerebellar.granule.layer.morphology	0.879422	4.11452e-11
abnormal.cerebellar.layer.morphology	0.879422	4.11452e-11
abnormal.cerebellum.external.granule.cell.layer.morphology	0.879422	4.11452e-11
abnormal.Purkinje.cell.morphology	0.879422	4.11452e-11
abnormal.survival	0.879422	4.11452e-11
abnormal.tumor.incidence	0.879422	4.11452e-11
ataxia	0.879422	4.11452e-11
decreased.cerebellar.granule.cell.number	0.879422	4.11452e-11
decreased.hematopoietic.cell.number	0.879422	4.11452e-11
decreased.leukocyte.cell.number	0.879422	4.11452e-11
decreased.lymphoma.incidence	0.879422	4.11452e-11
ectopic.Purkinje.cell	0.879422	4.11452e-11
hyperpigmentation	0.879422	4.11452e-11
impaired.coordination	0.879422	4.11452e-11
increased.hematopoietic.stem.cell.proliferation	0.879422	4.11452e-11
increased.metastatic.potential	0.879422	4.11452e-11
increased.mortality.induced.by.gamma.irradiation	0.879422	4.11452e-11
increased.tumor.latency	0.879422	4.11452e-11
pancytopenia	0.879422	4.11452e-11
small.cerebellum	0.879422	4.11452e-11
small.spleen	0.879422	4.11452e-11
thin.external.granule.cell.layer	0.879422	4.11452e-11
thrombocytopenia	0.879422	4.11452e-11
abnormal.hematopoietic.system.morphology.development	0.571484	3.01699e-05
decreased.bone.marrow.cell.number	0.437444	0.000589087
decreased.hematopoietic.stem.cell.number	0.437444	0.000589087
small.thymus	0.421595	0.000800916
abnormal.epidermal.melanocyte.morphology	0.414806	0.000911452
abnormal.bone.marrow.cell.physiology	0.413863	0.000927875
anemia	0.411081	0.000977911
decreased.erythrocyte.cell.number	0.370312	0.00206191
prenatal.lethality..complete.penetrance	0.368161	0.0021422
embryonic.lethality..complete.penetrance	0.368161	0.0021422
increased.ear.pigmentation	0.305817	0.00620193
increased.foot.pad.pigmentation	0.305817	0.00620193
increased.tail.pigmentation	0.305817	0.00620193
postnatal.growth.retardation	0.304052	0.00638424
decreased.body.weight	0.281654	0.00917705
postnatal.lethality..incomplete.penetrance	0.277986	0.00973107
abnormal.bone.ossification	0.0683486	0.228212
abnormal.cerebral.cortex.morphology	0.0683486	0.228212
abnormal.hindbrain.morphology	0.0683486	0.228212
abnormal.spatial.working.memory	0.0683486	0.228212
cervical.vertebral.transformation	0.0683486	0.228212
decreased.neural.crest.cell.number	0.0683486	0.228212
decreased.vertebrae.number	0.0683486	0.228212
enlarged.brain.ventricles	0.0683486	0.228212
hypopigmentation	0.0683486	0.228212
increased.mean.corpuscular.volume	0.0683486	0.228212
increased.neuron.apoptosis	0.0683486	0.228212
microphthalmia	0.0683486	0.228212
perinatal.lethality	0.0683486	0.228212
small.hippocampus	0.0683486	0.228212
thin.cerebral.cortex	0.0683486	0.228212
uveal.coloboma	0.0683486	0.228212
premature.death	0.0622546	0.250909
abnormal.vertebral.arch.morphology	0.0319876	0.414203
abnormal.vertebral.transverse.process.morphology	0.0319876	0.414203
asymmetric.sternocostal.joints	0.0319876	0.414203
increased.rib.number	0.0319876	0.414203
lumbar.vertebral.transformation	0.0319876	0.414203
abnormal.sternebra.morphology	0.0319876	0.414203
curly.tail	0.0319876	0.414203
vertebral.fusion	0.0319876	0.414203
embryonic.growth.retardation	0.0305372	0.425164
abnormal.eye.development	0.0222903	0.496561
abnormal.eye.size	0.0222903	0.496561
abnormal.optic.cup.morphology	0.0222903	0.496561
abnormal.optic.nerve.morphology	0.0222903	0.496561
abnormal.retina.morphology	0.0222903	0.496561
abnormal.retinal.ganglion.layer.morphology	0.0222903	0.496561
abnormal.retinal.inner.plexiform.layer.morphology	0.0222903	0.496561
abnormal.retinal.layer.morphology	0.0222903	0.496561
abnormal.retinal.neuronal.layer.morphology	0.0222903	0.496561
abnormal.retinal.progenitor.cell.morphology	0.0222903	0.496561
absent.optic.nerve	0.0222903	0.496561
cataract	0.0222903	0.496561
decreased.retinal.ganglion.cell.number	0.0222903	0.496561
disorganized.retinal.inner.nuclear.layer	0.0222903	0.496561
disorganized.retinal.outer.nuclear.layer	0.0222903	0.496561
embryonic.lethality..incomplete.penetrance	0.0222903	0.496561
impaired.pupillary.reflex	0.0222903	0.496561
increased.lumbar.vertebrae.number	0.0222903	0.496561
optic.nerve.atrophy	0.0222903	0.496561
optic.nerve.coloboma	0.0222903	0.496561
optic.nerve.hypoplasia	0.0222903	0.496561
pathological.neovascularization	0.0222903	0.496561
persistence.of.hyaloid.vascular.system	0.0222903	0.496561
retina.hypoplasia	0.0222903	0.496561
retinal.detachment	0.0222903	0.496561
retinal.neovascularization	0.0222903	0.496561
thin.retinal.ganglion.layer	0.0222903	0.496561
thin.retinal.inner.nuclear.layer	0.0222903	0.496561
white.spotting	0.0222903	0.496561
abnormal.circulating.glucose.level	0.01605	0.564599
abnormal.oxidative.phosphorylation	0.01605	0.564599
abnormal.redox.activity	0.01605	0.564599
improved.glucose.tolerance	0.01605	0.564599
increased.insulin.secretion	0.01605	0.564599
increased.oxygen.consumption	0.01605	0.564599
decreased.susceptibility.to.autoimmune.diabetes	0.01605	0.564599
abnormal.cytokine.level	0.01605	0.564599
abnormal.lung.morphology	0.01605	0.564599
abnormal.macrophage.chemotaxis	0.01605	0.564599
hypoactivity	0.01605	0.564599
increased.blood.urea.nitrogen.level	0.01605	0.564599
increased.circulating.aspartate.transaminase.level	0.01605	0.564599
increased.circulating.tumor.necrosis.factor.level	0.01605	0.564599
tachypnea	0.01605	0.564599
increased.apoptosis	0.0141972	0.588161
abnormal.digit.morphology	0.0140227	0.590481
caudal.vertebral.fusion	0.0140227	0.590481
decreased.embryo.size	0.0140227	0.590481
exencephaly	0.0140227	0.590481
polydactyly	0.0140227	0.590481
abnormal.erythropoiesis	0.0125348	0.611034
decreased.birth.weight	0.0113938	0.627848
decreased.erythroid.progenitor.cell.number	0.0113938	0.627848
decreased.hematocrit	0.0113938	0.627848
decreased.hemoglobin.content	0.0113938	0.627848
embryonic.lethality.during.organogenesis..incomplete.penetrance	0.0113938	0.627848
reticulocytopenia	0.0113938	0.627848
preweaning.lethality..complete.penetrance	0.0108424	0.636345
embryonic.lethality.during.organogenesis..complete.penetrance	0.0102447	0.645855
kinked.tail	0.00943968	0.659202
abnormal.skin.pigmentation	0.00829571	0.67938
increased.melanocyte.number	0.00829571	0.67938
abnormal.T.cell.differentiation	0.0082919	0.67945
abnormal.T.cell.number	0.0082919	0.67945
arrested.T.cell.differentiation	0.0082919	0.67945
decreased.CD4.positive..alpha.beta.T.cell.number	0.0082919	0.67945
decreased.CD8.positive..alpha.beta.T.cell.number	0.0082919	0.67945
decreased.double.negative.T.cell.number	0.0082919	0.67945
decreased.T.cell.number	0.0082919	0.67945
glomerulonephritis	0.0082919	0.67945
increased.T.cell.apoptosis	0.0082919	0.67945
abnormal.thymus.development	0.0082919	0.67945
decreased.B.cell.number	0.0082919	0.67945
decreased.body.size	0.00781435	0.688353
thymus.hypoplasia	0.00692564	0.705795
abnormal.cell.physiology	0.00675031	0.709383
abnormal.melanoblast.morphology	0.00674099	0.709576
delayed.optic.fissure.closure	0.00658668	0.712781
abnormal.pancreatic.beta.cell.morphology	0.00540685	0.73881
abnormal.craniofacial.development	0.00433219	0.765414
decreased.mean.corpuscular.hemoglobin.concentration	0.00433219	0.765414
fetal.growth.retardation	0.00433219	0.765414
heart.right.ventricle.degeneration	0.00433219	0.765414
irregular.heartbeat	0.00433219	0.765414
impaired.hematopoiesis	0.00419882	0.768956
abnormal.coat.appearance	0.00381527	0.779496
abnormal.coat..hair.morphology	0.00381527	0.779496
embryonic.lethality.prior.to.organogenesis	0.00381527	0.779496
decreased.caudal.vertebrae.number	0.00350844	0.788344
abnormal.testis.morphology	0.0033709	0.792445
hydrocephaly	0.0033709	0.792445
abnormal.embryo.development	0.00325903	0.795846
increased.startle.reflex	0.0030029	0.803875
abnormal.epidermal.pigmentation	0.00297446	0.804788
enlarged.spleen	0.00277792	0.811231
abnormal.bone.marrow.morphology	0.00239102	0.824655
abnormal.erythroid.progenitor.cell.morphology	0.00239102	0.824655
abnormal.megakaryocyte.morphology	0.00239102	0.824655
abnormal.platelet.shape	0.00239102	0.824655
abnormal.translation	0.00239102	0.824655
decreased.telomere.length	0.00239102	0.824655
thrombocytosis	0.00239102	0.824655
decreased.fibroblast.proliferation	0.00171979	0.850975
delayed.bone.ossification	0.00171979	0.850975
preweaning.lethality..incomplete.penetrance	0.00171979	0.850975
delayed.sexual.maturation	0.00171979	0.850975
abnormal.adipose.tissue.development	0.0016511	0.85395
abnormal.intestine.morphology	0.0016511	0.85395
abnormal.liver.morphology	0.0016511	0.85395
abnormal.skin.coloration	0.0016511	0.85395
abnormal.tail.position.or.orientation	0.0016511	0.85395
decreased.birth.body.size	0.0016511	0.85395
decreased.erythroblast.number	0.0016511	0.85395
male.infertility	0.0016511	0.85395
darkened.coat.color	0.00128011	0.87125
abnormal.dermal.pigmentation	0.00128011	0.87125
decreased.skin.pigmentation	0.00128011	0.87125
decreased.tail.pigmentation	0.00128011	0.87125
reduced.foot.pad.pigmentation	0.00128011	0.87125
abnormal.cell.morphology	0.00128011	0.87125
decreased.liver.regeneration	0.00128011	0.87125
abnormal.hepatocyte.morphology	0.00128011	0.87125
abnormal.pancreatic.islet.morphology	0.00128011	0.87125
decreased.circulating.insulin.level	0.00128011	0.87125
decreased.insulin.secretion	0.00128011	0.87125
impaired.glucose.tolerance	0.00128011	0.87125
increased.insulin.sensitivity	0.00128011	0.87125
short.tail	0.00122017	0.874277
embryonic.lethality.before.implantation..complete.penetrance	0.0008772	0.893285
abnormal.hematopoietic.stem.cell.physiology	0.000572438	0.91371
aneuploidy	0.000572438	0.91371
chromosomal.instability	0.000572438	0.91371
decreased.common.myeloid.progenitor.cell.number	0.000572438	0.91371
decreased.spleen.weight	0.000572438	0.91371
decreased.thymus.weight	0.000572438	0.91371
enlarged.liver	0.000572438	0.91371
enlarged.lymph.nodes	0.000572438	0.91371
increased.B.cell.derived.lymphoma.incidence	0.000572438	0.91371
increased.lymphoma.incidence	0.000572438	0.91371
increased.T.cell.derived.lymphoma.incidence	0.000572438	0.91371
increased.thymocyte.apoptosis	0.000572438	0.91371
liver.hypoplasia	0.000572438	0.91371
small.liver	0.000572438	0.91371
spleen.hypoplasia	0.000572438	0.91371
thymus.cortex.hypoplasia	0.000572438	0.91371
abnormal.tail.morphology	0.000362753	0.931263
prenatal.lethality..incomplete.penetrance	0.000204999	0.948302
abnormal.cervical.atlas.morphology	0.000204999	0.948302
abnormal.cervical.vertebrae.morphology	0.000204999	0.948302
abnormal.cranium.morphology	0.000204999	0.948302
abnormal.rib.morphology	0.000204999	0.948302
abnormal.vertebral.lamina.morphology	0.000204999	0.948302
abnormal.vertebral.pedicle.morphology	0.000204999	0.948302
abnormal.vertebral.spinous.process.morphology	0.000204999	0.948302
caudal.vertebral.transformation	0.000204999	0.948302
cervical.vertebral.fusion	0.000204999	0.948302
sacral.vertebral.transformation	0.000204999	0.948302
vertebral.transformation	0.000204999	0.948302
embryonic.lethality.between.implantation.and.somite.formation..complete.penetrance	0.000204999	0.948302
abnormal.forelimb.morphology	0.000204999	0.948302
abnormal.nasal.bone.morphology	0.000204999	0.948302
absent.caudal.vertebrae	0.000204999	0.948302
absent.tail	0.000204999	0.948302
decreased.body.length	0.000204999	0.948302
decreased.cranium.height	0.000204999	0.948302
incomplete.rostral.neuropore.closure	0.000204999	0.948302
increased.cranium.width	0.000204999	0.948302
irregular.coat.pigmentation	0.000204999	0.948302
oligodactyly	0.000204999	0.948302
perinatal.lethality..incomplete.penetrance	0.000204999	0.948302
reduced.fertility	0.000204999	0.948302
spina.bifida	0.000204999	0.948302
abnormal.autopod.morphology	0.000204999	0.948302
abnormal.heart.development	0.000204999	0.948302
abnormal.humerus.morphology	0.000204999	0.948302
abnormal.metacarpal.bone.morphology	0.000204999	0.948302
abnormal.metatarsal.bone.morphology	0.000204999	0.948302
abnormal.nasal.cavity.morphology	0.000204999	0.948302
abnormal.neural.tube.morphology	0.000204999	0.948302
abnormal.neuromere.morphology	0.000204999	0.948302
abnormal.notochord.morphology	0.000204999	0.948302
abnormal.olfactory.bulb.morphology	0.000204999	0.948302
abnormal.placenta.vasculature	0.000204999	0.948302
abnormal.sacral.vertebrae.morphology	0.000204999	0.948302
abnormal.vertebrae.development	0.000204999	0.948302
abnormal.vitelline.vasculature.morphology	0.000204999	0.948302
decreased.length.of.long.bones	0.000204999	0.948302
increased.sternebra.number	0.000204999	0.948302
increased.thoracic.vertebrae.number	0.000204999	0.948302
rib.fusion	0.000204999	0.948302
short.femur	0.000204999	0.948302
short.humerus	0.000204999	0.948302
short.radius	0.000204999	0.948302
short.snout	0.000204999	0.948302
short.tibia	0.000204999	0.948302
small.caudal.vertebrae	0.000204999	0.948302
sternebra.fusion	0.000204999	0.948302
wavy.neural.tube	0.000204999	0.948302
abnormal.auditory.tube.morphology	0.000204999	0.948302
abnormal.distortion.product.otoacoustic.emission	0.000204999	0.948302
abnormal.embryonic.erythropoiesis	0.000204999	0.948302
abnormal.hearing.physiology	0.000204999	0.948302
abnormal.middle.ear.morphology	0.000204999	0.948302
abnormal.oval.window.morphology	0.000204999	0.948302
abnormal.round.window.morphology	0.000204999	0.948302
anencephaly	0.000204999	0.948302
conductive.hearing.loss	0.000204999	0.948302
increased.circulating.phosphate.level	0.000204999	0.948302
increased.or.absent.threshold.for.auditory.brainstem.response	0.000204999	0.948302
increased.susceptibility.to.otitis.media	0.000204999	0.948302
omphalocele	0.000204999	0.948302
abnormal.blastocoele.morphology	0.000204999	0.948302
abnormal.blastocyst.morphology	0.000204999	0.948302
abnormal.nucleolus.morphology	0.000204999	0.948302
abnormal.preimplantation.embryo.development	0.000204999	0.948302
absent.blastocoele	0.000204999	0.948302
embryonic.growth.arrest	0.000204999	0.948302
embryonic.lethality.at.implantation..incomplete.penetrance	0.000204999	0.948302
cleft.palate	0.000204999	0.948302
cleft.upper.lip	0.000204999	0.948302
herniated.abdominal.wall	0.000204999	0.948302
abnormal.cell.cycle	0.000155166	0.955015
postnatal.lethality..complete.penetrance	4.83538e-05	0.974879
belly.spot	2.30497e-05	0.982655

## Sheet: mouse_genes_cos2
	Dim 1	Dim 2	Dim 3
Rpl12	0.194488	0.0316123	0.0782302
Rpl13a	0.0201439	0.00761671	0.0289532
Rpl22	0.0238078	0.00691642	0.0196049
Rpl22l1	0.105669	0.0177849	0.0445392
Rpl24	0.000220961	0.978612	0.0186149
Rpl27a	0.0103503	0.046024	0.893674
Rpl29	0.026299	0.00434155	0.00870908
Rpl31	0.0543618	0.00357434	0.0307433
Rpl32	0.194311	0.0354523	0.0403279
Rpl38	0.997119	0.00137312	6.97432e-05
Rpl5	0.194443	0.0315639	0.0780501
Rpl7l1	0.0572871	0.0104294	0.026885
Rplp1	0.0153836	0.00381425	0.00444042
Rps12	0.194488	0.0316123	0.0782302
Rps14	0.0257104	0.00279851	0.00719614
Rps19	0.0104967	0.00517604	0.0264177
Rps20	0.0592241	0.013266	0.00295514
Rps24	0.194443	0.0315639	0.0780501
Rps26	0.119509	0.0193168	0.0476874
Rps27l	0.0118547	0.0158034	0.000831732
Rps6	0.0225996	0.00195428	0.00234193
Rps7	0.00232604	0.000311274	0.0852639
Rpsa	0.0377031	0.00786921	0.0185912
