# Supplementary material for: Ribosomal proteins: mutant phenotypes by the numbers and associated gene expression changes
Source: Open Biol. 2020 Aug 19;10(8):200114. doi: 10.1098/rsob.200114 (PMC7479938; doi:10.1098/rsob.200114)
Supplement: Worm MCA datasets [file rsob200114supp2.xlsx]

## Sheet: worm_phenotypes
	apoptosis fails to occur	apoptosis reduced	avoids bacterial lawn	diplotene absent during oogenesis	embryo osmotic integrity defective early emb	embryonic lethal	extended life span	germ cell compartment expansion absent	germ cell compartment expansion variant	gonad small	gonad vesiculated	growth variant	intestinal degeneration	larval arrest	lethal	maternal sterile	no oocytes	nuclei small	oocyte number decreased	pachytene progression during oogenesis variant	pachytene region organization variant	rachis absent	rachis morphology variant	rachis narrow	slow growth	sterile	transgene expression increased	transgene expression reduced	diplotene region organization variant	foraging behavior variant	germ cell compartment morphology variant	lysosome-related organelle morphology variant	patchy coloration	pleiotropic defects severe early emb	RAB-11 recycling endosome localization variant	RAB-11 recycling endosome morphology variant	transgene subcellular localization variant	cell membrane organization biogenesis variant	cytoplasmic processing body variant	distal tip cell migration variant	distal tip cell morphology variant	fewer germ cells	germ cell compartment anucleate	germ cell compartment multinucleate	late larval arrest	nuclear appearance variant	nuclei enlarged	oocytes lack nucleus	protruding vulva
rpl-1	y	y	y	y	y	y	y	y	y	y	y	y	y	y	y	y	y	y	y	y	y	y	y	y	y	y	y	y	n	n	n	n	n	n	n	n	n	n	n	n	n	n	n	n	n	n	n	n	n
rpl-10	n	n	y	n	n	y	y	n	y	n	y	n	n	y	n	y	n	n	y	n	y	n	n	y	y	y	n	y	y	y	y	y	y	y	y	y	y	n	n	n	n	n	n	n	n	n	n	n	n
rpl-11.1	n	n	y	n	n	y	n	n	y	n	y	n	n	y	n	y	y	n	y	n	y	n	n	y	y	y	n	n	y	n	y	y	n	y	y	y	y	y	y	y	y	y	y	y	y	y	y	y	y
rpl-11.2	n	n	y	n	n	n	n	n	n	n	n	n	n	y	n	y	n	n	n	n	n	n	n	n	y	n	n	n	n	y	n	n	n	y	n	n	y	n	n	n	n	n	n	n	n	n	n	n	n
rpl-12	y	y	n	y	n	y	n	y	y	y	y	n	n	n	y	y	y	y	y	y	y	y	y	y	y	y	n	n	n	n	n	n	n	y	n	n	n	n	n	n	n	n	n	n	n	n	n	n	n
rpl-13	n	y	n	y	n	y	n	y	y	y	n	n	n	y	n	y	y	y	y	y	y	n	n	y	n	y	n	y	n	y	n	n	n	y	n	n	y	n	y	n	n	n	n	n	n	n	n	n	n
rpl-14	n	n	y	n	n	y	n	n	y	n	y	n	n	y	y	y	n	n	y	n	y	n	n	y	y	y	n	y	y	n	y	y	n	y	n	y	y	n	n	n	n	n	n	n	n	n	y	n	n
rpl-15	y	y	n	y	n	y	n	y	y	y	y	n	n	y	n	y	y	y	y	y	y	y	y	y	y	y	n	n	n	n	n	n	n	y	n	n	y	n	n	n	n	n	n	n	n	n	n	n	n
rpl-16	n	n	y	n	n	y	n	n	n	n	n	n	n	y	n	n	n	n	n	n	n	n	n	n	y	n	n	n	n	n	n	n	n	y	n	n	n	n	n	n	n	n	n	n	n	n	n	n	n
rpl-17	y	y	y	y	n	y	y	y	y	y	y	n	n	y	y	y	y	y	y	y	y	y	y	y	y	y	y	y	n	n	n	n	n	y	n	n	y	n	y	n	n	n	n	n	n	n	n	n	n
rpl-18	n	y	y	n	n	y	n	n	y	n	n	n	n	y	n	y	n	n	y	n	y	n	n	y	y	y	y	y	y	n	n	n	n	y	n	n	y	y	y	n	n	n	n	n	n	n	y	n	n
rpl-19	y	y	n	y	n	y	y	n	y	y	y	n	n	y	n	y	n	n	y	n	y	n	y	y	n	y	n	y	y	n	y	y	n	y	n	y	y	y	n	n	n	n	n	n	n	n	n	n	n
rpl-2	n	n	y	n	n	y	n	n	y	n	y	n	n	y	y	y	n	n	y	n	y	n	n	y	y	y	y	n	y	y	y	n	y	y	n	n	y	n	y	n	n	n	n	n	n	n	y	n	n
rpl-20	n	y	y	n	n	y	n	n	y	n	y	n	n	y	n	y	n	n	y	n	y	n	n	y	y	y	n	n	y	n	y	y	n	y	n	y	y	y	n	n	n	n	n	n	n	n	n	n	n
rpl-21	n	y	y	n	n	y	n	n	y	n	y	n	n	y	n	y	n	n	y	n	y	n	n	y	y	y	n	n	y	n	y	n	n	y	n	n	y	y	n	n	n	n	y	n	n	n	n	y	n
rpl-22	n	n	y	n	n	y	n	n	y	n	y	n	n	y	y	y	n	n	y	n	y	n	n	y	y	y	n	y	y	n	y	y	y	n	y	y	y	n	y	n	n	n	n	n	y	n	n	n	n
rpl-23	n	n	y	n	n	y	y	n	y	n	y	n	n	y	y	y	n	n	y	n	y	n	y	y	y	y	y	y	y	n	y	n	n	y	n	n	y	n	y	n	n	n	n	y	n	n	y	n	n
rpl-24.1	n	n	y	n	n	y	n	n	n	n	n	n	n	y	n	y	n	n	n	n	n	n	n	n	y	n	y	n	n	n	n	n	n	y	n	n	y	n	n	n	n	n	n	n	n	n	n	n	n
rpl-24.2	n	n	n	n	y	y	n	n	n	n	n	y	n	y	y	y	n	n	n	n	n	n	n	n	n	y	n	n	n	n	n	n	n	n	n	n	n	n	n	n	n	n	n	n	n	n	n	n	y
rpl-25.1	n	n	n	n	n	y	n	n	n	n	n	n	n	y	n	y	n	n	n	n	n	n	n	n	y	y	n	y	n	n	n	n	n	n	n	n	y	n	y	n	n	n	n	n	n	n	n	n	y
rpl-25.2	n	y	n	n	n	y	n	n	y	y	y	n	n	n	n	y	n	n	y	n	y	n	y	y	y	y	y	n	y	n	y	n	n	y	n	n	n	y	n	n	n	n	n	n	n	n	n	n	y
rpl-26	y	y	n	y	n	y	n	y	y	y	y	n	n	y	n	y	y	y	y	y	y	y	y	y	y	y	n	y	n	n	n	y	n	y	n	y	y	n	n	n	n	n	n	n	n	n	n	n	n
rpl-27	n	n	y	n	n	y	n	n	n	n	n	n	n	y	n	y	n	n	n	n	n	n	n	n	y	n	n	n	n	n	n	n	n	y	n	n	n	n	n	n	n	n	n	n	n	n	n	n	n
rpl-28	n	n	n	n	n	y	y	n	n	n	n	n	n	y	n	n	n	n	n	n	n	n	n	n	n	n	n	n	n	n	n	n	n	n	n	n	n	n	n	n	n	n	n	n	n	n	n	n	n
rpl-29	n	n	n	n	n	n	n	n	n	n	n	n	n	n	n	n	n	n	n	n	n	n	n	n	y	n	n	n	n	n	n	n	n	n	n	n	n	n	n	n	n	n	n	n	n	n	n	n	n
rpl-3	n	n	y	n	n	y	y	n	y	n	y	n	n	y	n	y	n	n	y	n	y	n	n	y	y	y	n	y	y	y	y	y	n	y	y	y	y	y	n	n	n	n	n	n	n	n	n	n	n
rpl-30	n	n	y	y	y	y	y	n	y	n	y	y	n	y	n	y	n	y	y	n	y	n	n	y	y	y	n	y	y	n	y	n	n	n	n	y	y	y	n	n	n	y	n	n	n	n	n	n	y
rpl-31	y	y	y	y	n	y	y	y	y	y	y	n	n	y	n	y	y	y	y	y	y	y	y	y	y	y	n	y	n	n	n	n	n	y	n	n	y	n	n	n	n	n	n	n	n	n	n	n	y
rpl-32	n	n	y	n	n	n	n	n	n	n	n	n	n	y	n	y	n	n	n	n	n	n	n	n	y	y	n	n	n	n	n	n	n	n	n	n	n	n	n	n	n	n	n	n	n	n	n	n	n
rpl-33	n	n	n	n	n	y	n	n	n	n	n	n	n	y	n	n	n	n	n	n	n	n	n	n	y	n	n	y	n	n	n	y	n	y	y	y	y	n	n	n	n	n	n	n	n	n	n	n	n
rpl-34	n	n	y	n	n	y	y	n	n	n	n	n	n	y	y	n	n	n	n	n	n	n	n	n	y	y	n	n	n	n	n	n	y	y	n	n	n	n	y	n	n	n	n	n	n	n	n	n	n
rpl-35	n	y	y	n	n	y	n	n	y	n	y	n	n	y	n	y	n	n	y	n	y	n	n	y	y	y	n	y	y	n	y	n	n	y	n	n	y	y	n	n	n	n	n	n	n	n	y	n	n
rpl-36	n	n	y	n	n	y	n	n	y	n	y	n	n	y	n	y	n	n	y	n	y	n	n	n	y	y	y	y	y	n	n	n	n	y	n	n	n	n	n	n	n	n	n	n	n	n	n	n	n
rpl-36.A	n	n	y	n	n	y	n	n	y	n	y	n	n	y	n	y	n	n	n	n	y	n	n	y	y	y	y	y	y	n	y	n	n	y	n	n	y	y	y	n	n	n	n	n	n	n	y	n	y
rpl-37	n	n	y	n	n	y	n	n	n	n	n	n	n	y	n	y	n	n	n	n	n	n	n	n	y	y	y	n	n	n	n	n	n	y	n	n	y	n	y	n	n	n	n	n	n	n	n	n	y
rpl-38	n	n	n	n	n	n	n	n	n	n	n	n	n	y	n	n	n	n	n	n	n	n	n	n	y	y	n	n	n	n	n	n	n	n	n	n	n	n	n	n	n	n	n	n	n	n	n	n	y
rpl-39	y	y	n	y	n	y	n	y	y	y	y	n	n	y	y	y	y	y	y	y	y	y	y	y	y	y	n	n	n	n	n	n	n	y	n	n	y	n	y	n	n	n	n	n	n	n	n	n	n
rpl-4	n	n	n	n	n	y	y	n	y	y	y	n	n	n	n	y	n	y	y	n	y	n	n	y	n	y	n	n	y	n	y	n	n	y	n	n	n	y	n	n	n	n	y	n	n	n	n	y	n
rpl-41.1	n	n	n	n	n	n	n	n	n	n	n	n	n	n	n	n	n	n	n	n	n	n	n	n	n	n	n	n	n	n	n	n	n	n	n	n	n	n	n	n	n	n	n	n	n	n	n	n	n
rpl-41.2	n	n	n	n	n	n	n	n	n	n	n	n	n	n	n	n	n	n	n	n	n	n	n	n	n	n	n	n	n	n	n	n	n	n	n	n	n	n	n	n	n	n	n	n	n	n	n	n	n
rpl-43	n	n	n	n	n	y	n	n	n	n	n	n	n	y	n	n	n	n	n	n	n	n	n	n	y	n	n	n	n	n	n	n	y	y	n	n	n	n	n	n	n	n	n	n	n	n	n	n	n
rpl-5	n	n	y	n	n	y	n	n	y	n	y	n	n	y	n	y	n	n	y	n	y	n	n	y	y	y	y	y	y	n	y	y	y	y	y	y	y	n	y	n	n	n	n	n	n	n	n	n	y
rpl-6	n	y	y	y	n	y	y	n	y	n	y	n	n	y	n	y	n	y	y	n	y	n	n	y	y	y	n	y	y	n	y	n	n	y	n	n	y	y	n	n	n	n	n	y	n	n	n	n	n
rpl-7	n	n	y	n	n	y	y	n	y	n	y	n	n	y	n	y	n	n	y	n	y	n	n	y	y	y	n	n	y	n	y	y	n	y	n	y	y	y	n	n	n	n	n	n	n	n	y	n	n
rpl-7A	n	n	y	n	n	y	y	n	y	n	y	n	n	y	n	y	n	n	y	n	y	n	y	y	y	y	y	n	y	n	y	n	n	y	n	n	y	n	y	n	n	n	n	y	n	n	n	n	y
rpl-9	n	n	y	y	n	y	y	n	y	n	y	n	n	y	n	y	n	n	y	n	y	n	n	y	y	y	y	n	y	y	y	n	n	y	n	n	y	n	y	n	n	n	n	y	n	n	y	n	n
rps-0	n	y	y	y	n	y	y	n	y	n	n	n	n	y	n	y	y	y	n	y	y	n	y	n	y	y	n	n	y	n	y	n	n	y	n	n	y	n	n	n	n	n	n	y	n	n	n	n	y
rps-1	y	y	y	y	n	y	n	y	y	y	y	n	n	y	n	y	y	y	y	y	y	y	y	y	y	y	n	y	n	n	n	y	n	y	n	y	y	n	n	n	n	n	n	n	n	n	n	n	y
rps-10	y	y	n	y	n	y	y	y	y	y	n	n	n	y	n	y	y	y	y	y	y	y	n	y	n	y	y	n	n	n	y	y	n	y	n	y	y	y	n	n	n	n	n	n	n	n	n	n	n
rps-11	n	y	n	n	n	y	y	n	y	n	y	n	n	y	n	y	n	y	y	n	y	n	y	y	n	y	n	y	y	y	n	n	n	y	n	n	y	n	y	n	n	n	n	n	n	n	n	n	n
rps-12	n	n	y	n	n	y	y	n	y	n	y	n	n	y	n	y	n	y	y	n	y	n	y	y	y	y	y	n	y	n	n	n	n	y	n	n	y	n	y	n	n	n	n	n	n	n	n	n	n
rps-13	n	n	y	n	n	y	n	n	y	n	y	n	n	y	n	y	n	y	y	n	y	n	y	y	y	y	n	n	y	n	n	n	n	y	n	n	n	n	n	n	n	n	n	y	n	n	n	n	n
rps-14	n	n	y	n	n	y	y	n	y	n	n	n	n	y	n	y	n	n	y	n	y	n	n	y	y	y	n	y	y	n	n	n	n	y	n	n	n	y	n	n	n	n	n	n	n	n	n	n	n
rps-15	n	y	n	y	n	y	y	y	y	n	n	n	n	y	n	y	y	y	y	y	y	n	y	y	y	y	n	n	n	y	n	y	n	y	n	y	y	n	n	n	n	n	n	n	n	n	n	n	n
rps-16	n	y	n	y	y	y	y	n	y	n	y	n	n	y	n	y	n	y	n	n	y	n	y	y	n	y	n	n	y	n	n	n	n	n	n	n	y	n	n	n	n	n	n	n	n	n	n	n	n
rps-17	n	y	y	n	n	y	n	n	y	n	y	n	n	y	n	y	n	y	y	n	y	n	y	y	y	y	y	y	y	n	y	y	n	y	n	y	y	n	y	n	n	n	n	n	n	n	n	n	n
rps-18	n	n	n	n	n	n	n	n	y	n	y	n	n	n	n	y	n	n	n	n	y	n	y	y	n	y	n	y	y	n	n	n	n	n	n	n	y	n	n	n	n	n	n	n	n	n	n	n	n
rps-19	y	y	n	y	n	y	n	y	y	y	y	n	n	y	n	y	y	y	y	y	y	y	y	y	n	y	n	n	n	n	n	y	n	y	n	y	y	n	y	n	n	n	n	n	n	n	n	n	n
rps-2	n	y	n	y	n	y	n	n	y	n	y	n	n	y	n	y	n	y	n	n	y	n	y	n	n	y	y	y	y	n	n	y	n	y	y	y	y	n	y	n	n	n	y	n	n	n	n	y	n
rps-20	n	y	y	y	n	y	y	y	y	y	y	n	n	y	n	y	y	y	y	y	y	n	y	y	y	y	y	n	n	n	n	n	n	y	n	n	n	n	n	n	n	n	n	n	n	n	n	n	n
rps-21	n	n	y	y	n	y	y	n	y	n	y	n	n	y	n	y	n	y	y	n	y	n	y	y	y	y	y	n	y	n	n	n	n	y	n	n	y	n	y	n	n	n	n	n	n	n	n	n	n
rps-22	n	n	y	n	n	y	y	n	n	n	n	n	n	y	n	y	n	n	n	n	n	n	n	n	y	n	y	n	n	n	n	y	y	y	y	y	y	n	y	n	n	n	n	n	n	n	n	n	n
rps-23	y	y	n	y	n	y	y	y	y	y	y	n	n	y	y	y	y	y	y	y	y	y	y	y	n	y	n	n	n	n	n	n	n	y	n	n	n	n	n	n	n	n	n	n	n	n	n	n	y
rps-24	n	n	y	n	n	n	n	n	y	n	y	n	n	y	n	y	n	n	y	n	y	n	y	y	y	y	y	n	y	n	y	n	n	n	n	n	y	n	y	n	n	n	y	n	n	y	n	y	n
rps-25	n	n	n	n	n	y	n	n	n	n	n	n	n	n	n	n	n	n	n	n	n	n	n	n	y	n	n	n	n	n	n	n	n	n	n	n	n	n	n	n	n	n	n	n	n	n	n	n	n
rps-26	y	y	y	y	n	y	y	y	y	y	y	n	n	y	n	y	y	y	y	y	y	y	y	y	y	n	n	y	n	n	y	n	n	y	n	n	y	y	n	n	n	n	n	n	n	n	n	n	n
rps-27	n	n	y	n	n	y	y	n	n	n	n	n	n	y	n	n	n	n	n	n	n	n	n	n	y	n	n	y	n	y	n	n	n	y	n	n	n	n	n	n	n	n	n	n	n	n	n	n	n
rps-28	n	y	y	n	n	n	n	n	y	n	y	n	n	y	n	y	y	y	y	n	y	n	y	y	y	y	y	n	y	n	n	n	n	y	n	n	y	n	y	n	n	n	n	n	y	n	n	n	n
rps-29	n	n	y	n	n	y	y	n	y	n	y	n	n	y	n	y	y	y	n	n	y	n	y	n	y	y	n	y	y	n	y	y	y	y	n	y	y	n	y	n	n	n	n	n	n	n	n	n	n
rps-3	n	y	y	y	n	y	y	n	y	n	n	n	n	y	n	y	n	y	n	n	y	n	y	n	y	y	n	n	y	n	n	n	n	y	n	n	y	n	n	n	n	n	n	n	n	n	n	n	n
rps-30	n	n	n	n	n	n	n	n	n	n	n	n	n	y	y	y	n	n	n	n	n	n	n	n	y	y	n	y	n	n	n	n	n	y	n	n	n	n	n	n	n	n	n	n	n	n	n	n	n
rps-4	n	n	n	n	n	y	n	n	n	n	n	n	n	n	n	n	n	n	n	n	n	n	n	n	y	n	n	n	n	n	n	n	n	y	n	n	n	n	n	n	n	n	n	n	n	n	n	n	n
rps-5	y	y	y	y	n	y	y	y	y	y	n	n	n	y	n	y	y	y	y	y	y	n	n	y	y	y	y	n	n	n	y	n	n	y	n	n	y	y	y	n	n	n	n	n	n	n	n	n	n
rps-6	y	y	y	y	n	n	y	n	y	n	y	n	n	n	n	y	n	n	y	y	y	n	y	y	y	y	n	n	y	n	y	n	n	y	n	n	n	y	n	n	n	n	n	n	n	n	n	n	n
rps-7	y	y	n	y	n	y	n	y	y	y	n	n	n	y	n	y	y	y	y	y	y	y	n	y	n	y	n	y	n	n	y	n	n	y	n	n	n	y	n	n	n	n	n	n	n	n	n	n	n
rps-8	y	y	y	y	n	n	y	y	y	y	n	n	n	y	y	y	y	y	y	y	y	y	n	y	y	y	n	y	n	y	n	n	n	n	n	n	y	n	n	n	n	n	n	n	n	n	n	n	n
rps-9	y	y	n	y	n	y	y	y	y	y	y	n	n	y	n	y	y	y	y	y	y	y	y	y	y	y	n	n	n	n	n	y	n	y	y	y	y	y	n	n	n	n	n	n	n	n	n	n	n
[truncated: 102 more columns]

## Sheet: worm_eigen
	eigenvalue	percentage of variance	cumulative percentage of variance
dim 1	0.00675319	21.5489	21.5489
dim 2	0.00414612	13.2299	34.7788
dim 3	0.00223117	7.11948	41.8983
dim 4	0.00203099	6.48071	48.379
dim 5	0.00174509	5.56842	53.9474
dim 6	0.00144894	4.62343	58.5708
dim 7	0.00136876	4.36758	62.9384
dim 8	0.00111303	3.55159	66.49
dim 9	0.00107965	3.44507	69.9351
dim 10	0.000915261	2.92052	72.8556
dim 11	0.000857118	2.73499	75.5906
dim 12	0.000740834	2.36394	77.9545
dim 13	0.000719305	2.29524	80.2498
dim 14	0.00060723	1.93762	82.1874
dim 15	0.000493167	1.57366	83.761
dim 16	0.00048832	1.55819	85.3192
dim 17	0.000456425	1.45641	86.7756
dim 18	0.00040873	1.30422	88.0798
dim 19	0.000336866	1.07491	89.1548
dim 20	0.000292962	0.934816	90.0896
dim 21	0.000280084	0.893723	90.9833
dim 22	0.000262554	0.837787	91.8211
dim 23	0.00024548	0.783305	92.6044
dim 24	0.000208543	0.665443	93.2698
dim 25	0.000203471	0.649258	93.9191
dim 26	0.000190771	0.608735	94.5278
dim 27	0.00017183	0.548296	95.0761
dim 28	0.000152407	0.486319	95.5624
dim 29	0.000136937	0.436955	95.9994
dim 30	0.00011659	0.37203	96.3714
dim 31	0.000111548	0.35594	96.7274
dim 32	0.000104442	0.333264	97.0606
dim 33	9.47974e-05	0.30249	97.3631
dim 34	8.69881e-05	0.277572	97.6407
dim 35	7.8023e-05	0.248965	97.8897
dim 36	7.07306e-05	0.225695	98.1154
dim 37	6.32858e-05	0.20194	98.3173
dim 38	5.5904e-05	0.178385	98.4957
dim 39	5.44876e-05	0.173865	98.6695
dim 40	4.76833e-05	0.152153	98.8217
dim 41	4.58516e-05	0.146309	98.968
dim 42	3.80694e-05	0.121476	99.0895
dim 43	3.09972e-05	0.0989093	99.1884
dim 44	3.0861e-05	0.0984747	99.2869
dim 45	2.70735e-05	0.0863891	99.3733
dim 46	2.44835e-05	0.0781249	99.4514
dim 47	2.27573e-05	0.0726167	99.524
dim 48	1.89965e-05	0.0606163	99.5846
dim 49	1.71925e-05	0.0548598	99.6395
dim 50	1.56209e-05	0.049845	99.6893
dim 51	1.3473e-05	0.0429913	99.7323
dim 52	1.22636e-05	0.0391322	99.7714
dim 53	1.13129e-05	0.0360986	99.8075
dim 54	8.76213e-06	0.0279592	99.8355
dim 55	8.01309e-06	0.0255691	99.8611
dim 56	7.3132e-06	0.0233358	99.8844
dim 57	6.32417e-06	0.0201799	99.9046
dim 58	4.90869e-06	0.0156632	99.9202
dim 59	4.75064e-06	0.0151589	99.9354
dim 60	4.1278e-06	0.0131714	99.9486
dim 61	3.52538e-06	0.0112492	99.9598
dim 62	3.20091e-06	0.0102138	99.97
dim 63	2.73422e-06	0.00872467	99.9788
dim 64	1.68093e-06	0.0053637	99.9841
dim 65	1.42118e-06	0.00453485	99.9887
dim 66	9.77941e-07	0.00312053	99.9918
dim 67	6.60978e-07	0.00210913	99.9939
dim 68	5.47774e-07	0.0017479	99.9956
dim 69	4.29298e-07	0.00136985	99.997
dim 70	3.49568e-07	0.00111544	99.9981
dim 71	2.49171e-07	0.000795082	99.9989
dim 72	1.38544e-07	0.000442083	99.9994
dim 73	1.1494e-07	0.000366763	99.9997
dim 74	6.34181e-08	0.000202362	99.9999
dim 75	2.17567e-08	6.94237e-05	100
dim 76	1.12762e-62	3.59813e-59	100

## Sheet: worm_Dim1
	R2	p.value
germ.cell.compartment.expansion.variant	0.665818	1.57705e-19
pachytene.region.organization.variant	0.665818	1.57705e-19
apoptosis.reduced	0.56343	3.84842e-15
nuclei.small	0.555691	7.48731e-15
rachis.narrow	0.54986	1.22703e-14
diplotene.absent.during.oogenesis	0.544841	1.86789e-14
oocyte.number.decreased	0.510298	2.994e-13
pachytene.progression.during.oogenesis.variant	0.50868	3.39327e-13
germ.cell.compartment.expansion.absent	0.507558	3.70027e-13
gonad.small	0.503282	5.13771e-13
no.oocytes	0.500174	6.51089e-13
apoptosis.fails.to.occur	0.494422	1.0055e-12
rachis.absent	0.447896	2.86062e-11
maternal.sterile	0.411102	3.34769e-10
rachis.morphology.variant	0.403151	5.58669e-10
sterile	0.340947	2.48779e-08
gonad.vesiculated	0.313083	1.22299e-07
protein.aggregation.variant	0.207356	3.16674e-05
transgene.subcellular.localization.variant	0.20582	3.41657e-05
pathogen.resistance.increased	0.18512	9.40135e-05
early.larval.arrest	0.176866	0.000139988
locomotion.variant	0.157016	0.000360477
larval.lethal	0.132921	0.00111467
pleiotropic.defects.severe.early.emb	0.130413	0.0012524
extended.life.span	0.124193	0.00167055
acetylcholine.synaptic.transmission.variant	0.0940779	0.00666418
evoked.postsynaptic.current.variant	0.0940779	0.00666418
levamisole.resistant	0.0940779	0.00666418
ligand.gated.channel.activity.variant	0.0940779	0.00666418
nicotine.resistant	0.0940779	0.00666418
postsynaptic.region.morphology.variant	0.0940779	0.00666418
embryonic.lethal	0.0918189	0.00738953
lysosome.related.organelle.morphology.variant	0.0748168	0.0160831
RAB.11.recycling.endosome.morphology.variant	0.074647	0.0162087
larval.arrest	0.0731856	0.0173313
embryonic.terminal.arrest.variable.emb	0.072076	0.0182357
terminal.arrest.variable	0.072076	0.0182357
cell.membrane.organization.biogenesis.variant	0.0636508	0.0268579
transgene.expression.undetectable	0.0622742	0.0286178
molt.defect	0.058157	0.0346155
thin	0.0541713	0.0416491
germ.cell.compartment.morphology.variant	0.0469849	0.0582875
axon.fasciculation.variant	0.045525	0.062438
axon.midline.crossing.variant	0.045525	0.062438
cord.commissures.fail.to.reach.target	0.045525	0.062438
ventral.cord.patterning.variant	0.045525	0.062438
adult.lethal	0.0450396	0.0638854
sister.cell.division.timing.asynchrony.reduced	0.0450396	0.0638854
organism.morphology.variant	0.0440147	0.0670578
transgene.expression.reduced	0.0416677	0.0749603
sterile.F1	0.0413538	0.0760892
multiple.nuclei.early.emb	0.0388411	0.0857985
transposon.silencing.variant	0.0346667	0.104954
variable.cell.division.timing	0.0303441	0.12973
hermaphrodite.self.sterile	0.028472	0.142382
male.sterile	0.028472	0.142382
sperm.fertility.defective	0.028472	0.142382
translation.variant	0.0284482	0.142551
development.phenotype	0.0283417	0.143312
oocytes.small	0.0280623	0.145328
slow.embryonic.development	0.0277984	0.147261
L1.arrest	0.0263081	0.158731
reduced.brood.size	0.0261349	0.160128
clear	0.0249224	0.170299
gonad.development.variant	0.0244937	0.174066
cytoplasmic.processing.body.variant	0.0238591	0.179819
dead.eggs.laid	0.0232739	0.185316
dauer.lifespan.extended	0.0231657	0.186354
slow.development	0.0218538	0.199474
dumpy	0.0215768	0.202378
gonad.morphology.variant	0.0206241	0.21275
patchy.coloration	0.0202836	0.216605
transgene.expression.increased	0.0181527	0.242699
fat.content.reduced	0.0167649	0.261725
protein.subcellular.localization.variant	0.0167649	0.261725
embryonic.arrest	0.0154172	0.281972
chromosome.condensation.variant	0.0148489	0.291089
lethal	0.0142374	0.301321
peptide.uptake.by.intestinal.cell.decreased	0.0132213	0.319354
sick	0.0131119	0.321379
slow.growth	0.0128615	0.326075
oocyte.morphology.variant	0.0128065	0.327117
diplotene.region.organization.variant	0.0126802	0.32953
cell.secretion.variant	0.0102419	0.381154
gonad.migration.variant	0.00995761	0.387879
male.gonad.development.variant	0.00983231	0.390896
male.somatic.gonad.development.variant	0.00983231	0.390896
mRNA.surveillance.defective	0.00978142	0.392131
nonsense.mRNA.accumulation	0.00978142	0.392131
intestinal.degeneration	0.00966584	0.394956
sluggish	0.00924423	0.405513
pattern.of.transgene.expression.variant	0.00833399	0.429749
paraquat.hypersensitive	0.00724415	0.461742
unfolded.protein.response.variant	0.00724415	0.461742
paraquat.resistant	0.00687981	0.47327
oogenesis.variant	0.00680851	0.47558
no.induction.of.antimicrobial.peptide.expression.after.infection	0.00680161	0.475804
germ.cell.development.variant	0.00553071	0.520354
sterile.progeny	0.00543063	0.524163
dauer.constitutive	0.00468902	0.554021
germline.nuclear.positioning.variant	0.00381536	0.593575
gonad.arm.morphology.variant	0.0034373	0.612517
germ.cell.partition.morphology.variant	0.00327073	0.621278
nuclear.fallout	0.00327073	0.621278
germ.cell.compartment.size.variant	0.00309505	0.630824
small	0.0024576	0.668535
oocytes.disorganized	0.00162156	0.728053
aldicarb.resistant	0.00145223	0.742119
receptor.mediated.endocytosis.defective	0.00143178	0.743879
avoids.bacterial.lawn	0.00131007	0.754648
life.span.phenotype	0.00105613	0.779033
blistered	0.00098341	0.786589
RNAi.resistant	0.00098341	0.786589
somatic.transgene.silencing.variant	0.00098341	0.786589
germ.cell.compartment.multinucleate	0.000824624	0.804201
protein.metabolism.variant	0.000732758	0.815224
transgene.expression.variant	0.000673091	0.822779
growth.variant	0.000600872	0.83241
protein.complex.organization.variant	0.00054097	0.840868
protruding.vulva	0.000509128	0.845563
organism.heat.response.variant	0.000445268	0.855461
heparan.sulfate.biosynthesis.variant	0.000439637	0.856368
P.granule.localization.defective	0.000439637	0.856368
presynaptic.vesicle.cluster.localization.variant	0.000439637	0.856368
RAB.11.recycling.endosome.localization.variant	0.000387472	0.865073
nuclear.appearance.variant	0.00035373	0.871029
foraging.behavior.variant	0.00026243	0.88879
distal.tip.cell.migration.variant	0.000240946	0.893411
distal.tip.cell.morphology.variant	0.000240946	0.893411
endosome.biogenesis.variant	0.000236379	0.89442
lysosome.organization.biogenesis.variant	0.000236379	0.89442
reproductive.system.morphology.variant	0.000236379	0.89442
chromosome.segregation.variant.karyomeres.early.emb	0.000232232	0.895345
oocyte.septum.formation.variant	0.000225999	0.896752
long	0.000212204	0.899936
nuclei.enlarged	0.000201717	0.902427
germ.cell.compartment.anucleate	0.00015977	0.913119
oocytes.lack.nucleus	0.00015977	0.913119
giant.oocytes	0.000125819	0.922868
germ.cell.compartment.small	0.000118813	0.92504
apoptosis.variant	0.000113866	0.926613
organism.development.variant	9.59947e-05	0.932603
late.larval.arrest	8.504e-05	0.936557
apoptosis.increased	5.41255e-05	0.949366
diakinesis.region.organization.variant	5.41255e-05	0.949366
gonad.degenerate	5.41255e-05	0.949366
embryo.osmotic.integrity.defective.early.emb	3.91696e-05	0.956918
developmental.delay.postembryonic	2.00028e-05	0.969206
accumulated.germline.cell.corpses	5.56377e-06	0.983757
cell.differentiation.variant	5.24362e-07	0.995013
fewer.germ.cells	1.10681e-08	0.999275

## Sheet: worm_Dim2
	R2	p.value
diplotene.region.organization.variant	0.716792	3.06934e-22
germ.cell.compartment.morphology.variant	0.287683	4.96283e-07
germ.cell.compartment.expansion.absent	0.287321	5.06148e-07
mRNA.surveillance.defective	0.287257	5.07896e-07
nonsense.mRNA.accumulation	0.287257	5.07896e-07
avoids.bacterial.lawn	0.284207	5.99043e-07
rachis.absent	0.275187	9.72362e-07
pachytene.progression.during.oogenesis.variant	0.238939	6.46571e-06
apoptosis.fails.to.occur	0.238051	6.76618e-06
gonad.small	0.232024	9.19796e-06
oocytes.small	0.223501	1.41516e-05
cytoplasmic.processing.body.variant	0.214708	2.19812e-05
oocyte.morphology.variant	0.203737	3.78635e-05
transgene.subcellular.localization.variant	0.19631	5.45312e-05
gonad.vesiculated	0.193822	6.15807e-05
germ.cell.compartment.expansion.variant	0.185672	9.15304e-05
pachytene.region.organization.variant	0.185672	9.15304e-05
nuclei.enlarged	0.166552	0.000229297
transgene.expression.increased	0.163218	0.000268695
germline.nuclear.positioning.variant	0.159648	0.00031827
maternal.sterile	0.150841	0.000482318
germ.cell.compartment.multinucleate	0.150288	0.000495035
sterile	0.145931	0.000607407
aldicarb.resistant	0.136061	0.000963201
germ.cell.compartment.anucleate	0.123643	0.00171357
oocytes.lack.nucleus	0.123643	0.00171357
male.gonad.development.variant	0.120124	0.00201596
male.somatic.gonad.development.variant	0.120124	0.00201596
acetylcholine.synaptic.transmission.variant	0.114885	0.00256637
evoked.postsynaptic.current.variant	0.114885	0.00256637
levamisole.resistant	0.114885	0.00256637
ligand.gated.channel.activity.variant	0.114885	0.00256637
nicotine.resistant	0.114885	0.00256637
postsynaptic.region.morphology.variant	0.114885	0.00256637
no.oocytes	0.103603	0.00430866
late.larval.arrest	0.0973069	0.0057489
diplotene.absent.during.oogenesis	0.0948683	0.00642755
sick	0.0909076	0.00770397
nuclear.appearance.variant	0.0887616	0.00849825
germ.cell.development.variant	0.0876997	0.00892103
slow.growth	0.0796979	0.0128627
gonad.morphology.variant	0.0789639	0.013302
rachis.narrow	0.077509	0.0142178
organism.development.variant	0.0734077	0.0171557
heparan.sulfate.biosynthesis.variant	0.0691949	0.020813
P.granule.localization.defective	0.0691949	0.020813
presynaptic.vesicle.cluster.localization.variant	0.0691949	0.020813
germ.cell.compartment.size.variant	0.067109	0.0229062
gonad.development.variant	0.0653435	0.0248439
oocyte.number.decreased	0.0652778	0.0249192
locomotion.variant	0.0600823	0.0316657
giant.oocytes	0.0594769	0.0325644
RAB.11.recycling.endosome.localization.variant	0.0592145	0.0329621
apoptosis.reduced	0.0513511	0.0475002
distal.tip.cell.migration.variant	0.0497245	0.0512543
distal.tip.cell.morphology.variant	0.0497245	0.0512543
pleiotropic.defects.severe.early.emb	0.0482729	0.0548639
larval.arrest	0.0479387	0.0557317
gonad.arm.morphology.variant	0.0462115	0.0604493
fewer.germ.cells	0.0402588	0.0801694
chromosome.condensation.variant	0.0401141	0.0807256
gonad.migration.variant	0.0387939	0.0859927
germ.cell.compartment.small	0.0382453	0.0882879
dumpy	0.0379719	0.0894556
patchy.coloration	0.0367434	0.0949098
oocytes.disorganized	0.0325368	0.116452
hermaphrodite.self.sterile	0.0295961	0.13463
male.sterile	0.0295961	0.13463
sperm.fertility.defective	0.0295961	0.13463
cell.membrane.organization.biogenesis.variant	0.0295243	0.135111
no.induction.of.antimicrobial.peptide.expression.after.infection	0.0290425	0.138388
oogenesis.variant	0.0285794	0.14162
transgene.expression.reduced	0.0285075	0.142129
RAB.11.recycling.endosome.morphology.variant	0.0281155	0.144941
transgene.expression.undetectable	0.0268232	0.154658
accumulated.germline.cell.corpses	0.0248733	0.170725
lysosome.related.organelle.morphology.variant	0.0240553	0.178018
embryonic.terminal.arrest.variable.emb	0.0230526	0.187445
terminal.arrest.variable	0.0230526	0.187445
paraquat.resistant	0.0229324	0.188613
early.larval.arrest	0.0214821	0.203383
extended.life.span	0.0195214	0.225539
cell.secretion.variant	0.0188856	0.233324
sterile.F1	0.0164356	0.266502
development.phenotype	0.0161751	0.270356
protein.metabolism.variant	0.0161167	0.27123
oocyte.septum.formation.variant	0.0158158	0.275787
cell.differentiation.variant	0.0155459	0.279956
pattern.of.transgene.expression.variant	0.0151954	0.285487
chromosome.segregation.variant.karyomeres.early.emb	0.0151556	0.286123
intestinal.degeneration	0.0145459	0.296103
slow.embryonic.development	0.0141065	0.303569
embryonic.lethal	0.0140751	0.304111
reduced.brood.size	0.0140367	0.304777
lethal	0.0138728	0.307637
nuclei.small	0.0129164	0.325037
apoptosis.increased	0.0126533	0.330047
diakinesis.region.organization.variant	0.0126533	0.330047
gonad.degenerate	0.0126533	0.330047
transgene.expression.variant	0.0123113	0.336711
apoptosis.variant	0.0118985	0.344995
long	0.0118976	0.345014
embryonic.arrest	0.0109067	0.366049
receptor.mediated.endocytosis.defective	0.0104959	0.375283
germ.cell.partition.morphology.variant	0.0101789	0.382631
nuclear.fallout	0.0101789	0.382631
growth.variant	0.0101011	0.384465
peptide.uptake.by.intestinal.cell.decreased	0.00981921	0.391214
slow.development	0.00916216	0.407615
protein.aggregation.variant	0.00901511	0.411421
organism.heat.response.variant	0.00858439	0.422874
axon.fasciculation.variant	0.00774809	0.44651
axon.midline.crossing.variant	0.00774809	0.44651
cord.commissures.fail.to.reach.target	0.00774809	0.44651
ventral.cord.patterning.variant	0.00774809	0.44651
multiple.nuclei.early.emb	0.00773906	0.446776
embryo.osmotic.integrity.defective.early.emb	0.00693123	0.471616
organism.morphology.variant	0.00567764	0.514848
dauer.lifespan.extended	0.00553326	0.520257
rachis.morphology.variant	0.00505039	0.539097
sluggish	0.00495933	0.542787
L1.arrest	0.00410419	0.579899
adult.lethal	0.00399382	0.585049
sister.cell.division.timing.asynchrony.reduced	0.00399382	0.585049
paraquat.hypersensitive	0.00398181	0.585615
unfolded.protein.response.variant	0.00398181	0.585615
thin	0.00382219	0.593245
protein.complex.organization.variant	0.00372495	0.597993
clear	0.00352701	0.607908
endosome.biogenesis.variant	0.00346841	0.61091
lysosome.organization.biogenesis.variant	0.00346841	0.61091
reproductive.system.morphology.variant	0.00346841	0.61091
small	0.00247086	0.667694
foraging.behavior.variant	0.0024488	0.669094
sterile.progeny	0.00225447	0.68176
molt.defect	0.00163552	0.72693
protruding.vulva	0.00163122	0.727275
variable.cell.division.timing	0.00131655	0.754062
larval.lethal	0.00114755	0.769921
dauer.constitutive	0.00113639	0.771011
transposon.silencing.variant	0.000896524	0.796021
translation.variant	0.000896354	0.79604
blistered	0.000486322	0.849019
RNAi.resistant	0.000486322	0.849019
somatic.transgene.silencing.variant	0.000486322	0.849019
pathogen.resistance.increased	0.000406607	0.861813
dead.eggs.laid	0.000208576	0.90079
fat.content.reduced	0.000196352	0.903727
protein.subcellular.localization.variant	0.000196352	0.903727
life.span.phenotype	0.00014937	0.915983
developmental.delay.postembryonic	0.00011446	0.926422

## Sheet: worm_Dim3
	R2	p.value
cell.growth.defective	0.428735	1.86147e-10
some.die.during.immature.adult.stage	0.428735	1.86147e-10
some.die.during.embryonic.stage	0.330449	6.90729e-08
lethal...all.die.during.pupal.stage	0.261746	2.71831e-06
some.die.during.pupal.stage	0.250906	4.71788e-06
lethal...all.die.before.end.of.larval.stage	0.146549	0.000699647
some.die.during.larval.stage	0.126942	0.0017047
lethal...all.die.during.embryonic.stage	0.111418	0.00342669
lethal...all.die.before.end.of.first.instar.larval.stage	0.103233	0.00494282
some.die.during.first.instar.larval.stage	0.103233	0.00494282
decreased.fecundity	0.0997468	0.00577603
hyperplasia	0.092123	0.00811726
partially.lethal	0.0898438	0.00898598
female.semi.fertile	0.0692161	0.0225787
increased.cell.death	0.0692161	0.0225787
large.body	0.0556957	0.0415123
male.sterile	0.0524914	0.0480178
short.lived	0.0362253	0.101922
cell.cycle.defective	0.0354503	0.105729
lethal...all.die.during.first.instar.larval.stage	0.0354503	0.105729
lethal...all.die.during.larval.stage	0.0343379	0.111463
Minute	0.0335628	0.115656
cell.lethal	0.0198815	0.22757
visible	0.0157212	0.283783
decreased.cell.number	0.0134631	0.321523
tumorigenic.progressive..spermatogenesis	0.0130813	0.328531
decreased.cell.size	0.0120966	0.347551
increased.cell.size	0.00803809	0.444307
pain.response.defective	0.00633641	0.497221
developmental.rate.defective	0.00623469	0.500705
female.sterile	0.00553778	0.525742
cell.death.defective	0.00528294	0.53545
decreased.occurrence.of.cell.division	0.00528294	0.53545
female.fertile	0.00503505	0.545208
neuroanatomy.defectiveÂ.	0.00380323	0.599159
small.body	0.00227349	0.684576
lethal...all.die.before.end.of.second.instar.larval.stage	0.0015825	0.734717
partially.lethal...majority.die	0.00116596	0.771179
partially.lethal...majority.live	0.00069801	0.82198
size.defective	0.000118775	0.926062
non.suppressor.of.variegation	0.000104152	0.930751
suppressor.of.variegation	0.000104152	0.930751
mitotic.cell.cycle.defective	2.98778e-06	0.988257

## Sheet: worm_Dim4
	R2	p.value
partially.lethal	0.265428	2.25052e-06
cell.death.defective	0.236778	9.57963e-06
decreased.occurrence.of.cell.division	0.236778	9.57963e-06
lethal...all.die.before.end.of.first.instar.larval.stage	0.200482	5.62745e-05
some.die.during.first.instar.larval.stage	0.200482	5.62745e-05
some.die.during.pupal.stage	0.200236	5.69401e-05
cell.cycle.defective	0.177188	0.000169572
lethal...all.die.during.first.instar.larval.stage	0.177188	0.000169572
lethal...all.die.during.pupal.stage	0.173926	0.000197522
lethal...all.die.during.larval.stage	0.170811	0.00022842
decreased.fecundity	0.107557	0.00407366
visible	0.0937778	0.00753957
mitotic.cell.cycle.defective	0.0848731	0.0112165
lethal...all.die.during.embryonic.stage	0.0685094	0.0233054
partially.lethal...majority.die	0.0474242	0.060536
cell.growth.defective	0.047273	0.0609579
some.die.during.immature.adult.stage	0.047273	0.0609579
small.body	0.0450285	0.0675934
size.defective	0.0423177	0.0766287
some.die.during.larval.stage	0.0396781	0.0866556
lethal...all.die.before.end.of.larval.stage	0.0345984	0.110091
cell.lethal	0.0329441	0.119125
lethal...all.die.before.end.of.second.instar.larval.stage	0.0204085	0.221446
decreased.cell.size	0.0191895	0.23592
increased.cell.size	0.0170579	0.264047
partially.lethal...majority.live	0.0160453	0.278835
developmental.rate.defective	0.0154461	0.288071
female.semi.fertile	0.0134391	0.321959
increased.cell.death	0.0134391	0.321959
tumorigenic.progressive..spermatogenesis	0.011466	0.36051
female.sterile	0.0113448	0.363075
female.fertile	0.0096059	0.402846
short.lived	0.0083595	0.435305
hyperplasia	0.00607278	0.506336
some.die.during.embryonic.stage	0.00258637	0.664788
decreased.cell.number	0.00239854	0.676487
pain.response.defective	0.00105054	0.782506
Minute	0.000503506	0.848457
large.body	0.00032506	0.877981
neuroanatomy.defectiveÂ.	0.000138149	0.920278
non.suppressor.of.variegation	6.24169e-05	0.946365
suppressor.of.variegation	6.24169e-05	0.946365
male.sterile	1.31909e-06	0.992197

## Sheet: worm_Dim5
	R2	p.value
oocytes.small	0.377302	2.82596e-09
oocyte.morphology.variant	0.272954	1.09537e-06
apoptosis.increased	0.178651	0.000128469
diakinesis.region.organization.variant	0.178651	0.000128469
gonad.degenerate	0.178651	0.000128469
oocytes.disorganized	0.174977	0.000153282
lethal	0.163163	0.000269398
nuclei.enlarged	0.158272	0.000339702
male.gonad.development.variant	0.142225	0.000722481
male.somatic.gonad.development.variant	0.142225	0.000722481
slow.growth	0.138147	0.000873981
gonad.development.variant	0.127519	0.00143219
germ.cell.development.variant	0.124439	0.00165163
pathogen.resistance.increased	0.115306	0.00251711
larval.arrest	0.110183	0.0031858
heparan.sulfate.biosynthesis.variant	0.109391	0.00330385
P.granule.localization.defective	0.109391	0.00330385
presynaptic.vesicle.cluster.localization.variant	0.109391	0.00330385
germline.nuclear.positioning.variant	0.108094	0.00350665
giant.oocytes	0.103753	0.00427915
pattern.of.transgene.expression.variant	0.103395	0.00435004
axon.fasciculation.variant	0.100691	0.00492375
axon.midline.crossing.variant	0.100691	0.00492375
cord.commissures.fail.to.reach.target	0.100691	0.00492375
ventral.cord.patterning.variant	0.100691	0.00492375
accumulated.germline.cell.corpses	0.0951071	0.0063577
avoids.bacterial.lawn	0.0939968	0.00668895
gonad.arm.morphology.variant	0.0899565	0.00804641
fewer.germ.cells	0.0735303	0.0170596
development.phenotype	0.0689984	0.0210017
germ.cell.compartment.anucleate	0.0674075	0.0225941
oocytes.lack.nucleus	0.0674075	0.0225941
small	0.0631262	0.0275153
gonad.migration.variant	0.0625053	0.0283144
germ.cell.compartment.multinucleate	0.0585304	0.0340222
protruding.vulva	0.0544014	0.0412056
acetylcholine.synaptic.transmission.variant	0.0527659	0.0444659
evoked.postsynaptic.current.variant	0.0527659	0.0444659
levamisole.resistant	0.0527659	0.0444659
ligand.gated.channel.activity.variant	0.0527659	0.0444659
nicotine.resistant	0.0527659	0.0444659
postsynaptic.region.morphology.variant	0.0527659	0.0444659
embryonic.lethal	0.0524618	0.0451007
endosome.biogenesis.variant	0.0511476	0.0479539
lysosome.organization.biogenesis.variant	0.0511476	0.0479539
reproductive.system.morphology.variant	0.0511476	0.0479539
germ.cell.compartment.size.variant	0.0505624	0.0492836
transgene.expression.reduced	0.0505219	0.0493772
aldicarb.resistant	0.0477155	0.0563191
fat.content.reduced	0.0470441	0.0581253
protein.subcellular.localization.variant	0.0470441	0.0581253
growth.variant	0.046158	0.0606018
nuclei.small	0.0455108	0.0624798
rachis.morphology.variant	0.0411551	0.0768129
early.larval.arrest	0.0400225	0.0810797
protein.aggregation.variant	0.0374225	0.0918522
transgene.subcellular.localization.variant	0.0354167	0.101201
transgene.expression.increased	0.0349852	0.103342
mRNA.surveillance.defective	0.0336422	0.110324
nonsense.mRNA.accumulation	0.0336422	0.110324
oocyte.number.decreased	0.0324003	0.117234
gonad.morphology.variant	0.0317879	0.120813
germ.cell.compartment.morphology.variant	0.0290166	0.138566
life.span.phenotype	0.0284596	0.14247
variable.cell.division.timing	0.02842	0.142752
chromosome.segregation.variant.karyomeres.early.emb	0.0281416	0.144753
germ.cell.compartment.expansion.absent	0.0279778	0.145944
rachis.narrow	0.0257499	0.163281
distal.tip.cell.migration.variant	0.0239616	0.178876
distal.tip.cell.morphology.variant	0.0239616	0.178876
long	0.0233953	0.18416
chromosome.condensation.variant	0.0225037	0.192847
embryo.osmotic.integrity.defective.early.emb	0.0214092	0.20416
diplotene.region.organization.variant	0.0207679	0.211146
rachis.absent	0.0206106	0.212901
pachytene.progression.during.oogenesis.variant	0.0204034	0.21524
reduced.brood.size	0.0192174	0.229223
transgene.expression.variant	0.0185882	0.237075
locomotion.variant	0.0183212	0.240505
cell.differentiation.variant	0.0171075	0.256865
intestinal.degeneration	0.0161588	0.2706
apoptosis.fails.to.occur	0.0149596	0.289286
cytoplasmic.processing.body.variant	0.0144106	0.298377
blistered	0.0139608	0.306098
RNAi.resistant	0.0139608	0.306098
somatic.transgene.silencing.variant	0.0139608	0.306098
sick	0.013763	0.309573
receptor.mediated.endocytosis.defective	0.012806	0.327128
dauer.constitutive	0.0103137	0.379481
paraquat.resistant	0.00988871	0.389534
dumpy	0.00869846	0.419795
oocyte.septum.formation.variant	0.00857216	0.423206
larval.lethal	0.00855071	0.423789
germ.cell.compartment.small	0.00792693	0.44129
RAB.11.recycling.endosome.localization.variant	0.0075	0.45391
organism.morphology.variant	0.00597909	0.503863
patchy.coloration	0.00564684	0.515994
diplotene.absent.during.oogenesis	0.00551212	0.521058
organism.development.variant	0.00527715	0.530101
no.oocytes	0.00484205	0.547609
adult.lethal	0.00464277	0.555987
sister.cell.division.timing.asynchrony.reduced	0.00464277	0.555987
embryonic.arrest	0.00437432	0.567662
late.larval.arrest	0.00430159	0.570907
embryonic.terminal.arrest.variable.emb	0.00362906	0.602753
terminal.arrest.variable	0.00362906	0.602753
protein.complex.organization.variant	0.00362594	0.602909
maternal.sterile	0.00346035	0.611326
slow.development	0.00344092	0.612329
RAB.11.recycling.endosome.morphology.variant	0.00329244	0.620121
dauer.lifespan.extended	0.00326332	0.621675
multiple.nuclei.early.emb	0.00310542	0.630252
apoptosis.reduced	0.00305587	0.632998
molt.defect	0.00291698	0.640846
sterile.progeny	0.0025801	0.660869
hermaphrodite.self.sterile	0.0025207	0.664558
male.sterile	0.0025207	0.664558
sperm.fertility.defective	0.0025207	0.664558
protein.metabolism.variant	0.00223826	0.682845
nuclear.appearance.variant	0.00219115	0.686024
no.induction.of.antimicrobial.peptide.expression.after.infection	0.00201741	0.698103
sterile.F1	0.00166199	0.724817
oogenesis.variant	0.00163974	0.726592
slow.embryonic.development	0.00163539	0.726941
foraging.behavior.variant	0.00155323	0.733626
sterile	0.00129514	0.756006
sluggish	0.00114045	0.770614
translation.variant	0.00106627	0.778002
developmental.delay.postembryonic	0.00104776	0.779888
gonad.vesiculated	0.00097894	0.787063
organism.heat.response.variant	0.000886592	0.797129
dead.eggs.laid	0.000691061	0.820468
peptide.uptake.by.intestinal.cell.decreased	0.000647053	0.826186
transposon.silencing.variant	0.000510324	0.845384
thin	0.000445261	0.855462
paraquat.hypersensitive	0.000433935	0.857292
unfolded.protein.response.variant	0.000433935	0.857292
pleiotropic.defects.severe.early.emb	0.000396077	0.863597
clear	0.000241412	0.893309
L1.arrest	0.000235621	0.894589
germ.cell.partition.morphology.variant	0.000220261	0.898064
nuclear.fallout	0.000220261	0.898064
extended.life.span	0.000156377	0.914043
apoptosis.variant	0.000112043	0.927201
gonad.small	8.72276e-05	0.935748
cell.membrane.organization.biogenesis.variant	7.25796e-05	0.94138
transgene.expression.undetectable	5.59904e-05	0.948503
cell.secretion.variant	2.83137e-05	0.963367
germ.cell.compartment.expansion.variant	6.24965e-08	0.998278
pachytene.region.organization.variant	6.24965e-08	0.998278
lysosome.related.organelle.morphology.variant	1.32388e-08	0.999208

## Sheet: worm_Dim6
	R2	p.value
RAB.11.recycling.endosome.morphology.variant	0.301515	2.32795e-07
fewer.germ.cells	0.2813	7.00657e-07
endosome.biogenesis.variant	0.235809	7.58673e-06
lysosome.organization.biogenesis.variant	0.235809	7.58673e-06
reproductive.system.morphology.variant	0.235809	7.58673e-06
lysosome.related.organelle.morphology.variant	0.186905	8.62234e-05
heparan.sulfate.biosynthesis.variant	0.160007	0.000312904
P.granule.localization.defective	0.160007	0.000312904
presynaptic.vesicle.cluster.localization.variant	0.160007	0.000312904
axon.fasciculation.variant	0.13538	0.000994244
axon.midline.crossing.variant	0.13538	0.000994244
cord.commissures.fail.to.reach.target	0.13538	0.000994244
ventral.cord.patterning.variant	0.13538	0.000994244
transgene.expression.increased	0.123422	0.00173111
apoptosis.increased	0.116571	0.00237468
diakinesis.region.organization.variant	0.116571	0.00237468
gonad.degenerate	0.116571	0.00237468
mRNA.surveillance.defective	0.11011	0.00319655
nonsense.mRNA.accumulation	0.11011	0.00319655
growth.variant	0.108555	0.00343324
gonad.morphology.variant	0.105823	0.0038918
germ.cell.compartment.size.variant	0.105503	0.00394937
RAB.11.recycling.endosome.localization.variant	0.0997057	0.00515104
larval.lethal	0.0956588	0.00619924
reduced.brood.size	0.0910452	0.00765567
embryo.osmotic.integrity.defective.early.emb	0.0897389	0.00812689
late.larval.arrest	0.0878493	0.00886025
oocytes.disorganized	0.0813032	0.011952
giant.oocytes	0.0791667	0.0131791
distal.tip.cell.migration.variant	0.0673479	0.0226561
distal.tip.cell.morphology.variant	0.0673479	0.0226561
small	0.0617623	0.0293017
larval.arrest	0.0586115	0.0338947
lethal	0.0550454	0.0399902
long	0.0528751	0.04424
dead.eggs.laid	0.0501496	0.0502446
transgene.subcellular.localization.variant	0.0463847	0.0599581
accumulated.germline.cell.corpses	0.0402426	0.0802315
chromosome.segregation.variant.karyomeres.early.emb	0.037893	0.0897957
gonad.arm.morphology.variant	0.0373858	0.092015
early.larval.arrest	0.0354149	0.101209
pleiotropic.defects.severe.early.emb	0.0351215	0.10266
chromosome.condensation.variant	0.0340403	0.108202
patchy.coloration	0.0317573	0.120995
blistered	0.0314249	0.12299
RNAi.resistant	0.0314249	0.12299
somatic.transgene.silencing.variant	0.0314249	0.12299
locomotion.variant	0.0311819	0.124471
gonad.migration.variant	0.0301412	0.13104
gonad.small	0.0283081	0.143552
organism.morphology.variant	0.0281329	0.144816
L1.arrest	0.0277335	0.147741
dumpy	0.0242598	0.176162
translation.variant	0.0229339	0.188598
adult.lethal	0.0227408	0.190492
sister.cell.division.timing.asynchrony.reduced	0.0227408	0.190492
germ.cell.development.variant	0.0224425	0.193459
nuclear.appearance.variant	0.0215194	0.202987
molt.defect	0.0198155	0.222042
variable.cell.division.timing	0.0192909	0.228325
rachis.morphology.variant	0.0185406	0.237682
germ.cell.compartment.multinucleate	0.0170091	0.258249
paraquat.resistant	0.016637	0.263568
transgene.expression.reduced	0.0165836	0.264342
cell.membrane.organization.biogenesis.variant	0.0165343	0.265059
slow.development	0.0165005	0.265551
hermaphrodite.self.sterile	0.0142272	0.301494
male.sterile	0.0142272	0.301494
sperm.fertility.defective	0.0142272	0.301494
cytoplasmic.processing.body.variant	0.0141831	0.302251
sick	0.0141047	0.303601
protruding.vulva	0.0122089	0.338742
nuclei.enlarged	0.0116486	0.350143
gonad.development.variant	0.0112936	0.357634
multiple.nuclei.early.emb	0.0112172	0.359275
receptor.mediated.endocytosis.defective	0.0110954	0.36191
male.gonad.development.variant	0.0110005	0.363984
male.somatic.gonad.development.variant	0.0110005	0.363984
pathogen.resistance.increased	0.0090012	0.411784
germ.cell.compartment.morphology.variant	0.00872028	0.41921
cell.differentiation.variant	0.00871218	0.419427
acetylcholine.synaptic.transmission.variant	0.00852194	0.424573
evoked.postsynaptic.current.variant	0.00852194	0.424573
levamisole.resistant	0.00852194	0.424573
ligand.gated.channel.activity.variant	0.00852194	0.424573
nicotine.resistant	0.00852194	0.424573
postsynaptic.region.morphology.variant	0.00852194	0.424573
developmental.delay.postembryonic	0.00741335	0.456539
oogenesis.variant	0.00719747	0.463194
protein.aggregation.variant	0.00660672	0.482216
slow.growth	0.00656937	0.483461
sterile.progeny	0.00606742	0.500719
germ.cell.compartment.anucleate	0.0058593	0.50818
oocytes.lack.nucleus	0.0058593	0.50818
clear	0.00540384	0.525191
germline.nuclear.positioning.variant	0.00514011	0.535504
avoids.bacterial.lawn	0.00499533	0.541323
oocyte.septum.formation.variant	0.00475599	0.551198
pachytene.progression.during.oogenesis.variant	0.00447249	0.563339
peptide.uptake.by.intestinal.cell.decreased	0.00426497	0.572554
organism.development.variant	0.00423082	0.574099
extended.life.span	0.0039658	0.586372
diplotene.absent.during.oogenesis	0.00379429	0.594599
cell.secretion.variant	0.00375412	0.59656
apoptosis.variant	0.00355203	0.606635
no.oocytes	0.00340199	0.614351
germ.cell.partition.morphology.variant	0.00317101	0.626657
nuclear.fallout	0.00317101	0.626657
diplotene.region.organization.variant	0.00293512	0.639808
germ.cell.compartment.small	0.00285434	0.644459
rachis.absent	0.0027791	0.648864
oocytes.small	0.00273363	0.65156
oocyte.morphology.variant	0.00244648	0.669242
dauer.lifespan.extended	0.00239432	0.672584
foraging.behavior.variant	0.00237994	0.673512
fat.content.reduced	0.00223539	0.683038
protein.subcellular.localization.variant	0.00223539	0.683038
germ.cell.compartment.expansion.absent	0.00218211	0.686638
development.phenotype	0.00208473	0.693354
transposon.silencing.variant	0.00200186	0.699213
life.span.phenotype	0.00196475	0.701882
embryonic.lethal	0.00185568	0.709897
apoptosis.fails.to.occur	0.00177885	0.715704
no.induction.of.antimicrobial.peptide.expression.after.infection	0.0016315	0.727253
protein.complex.organization.variant	0.00159305	0.730362
embryonic.arrest	0.0010787	0.776745
gonad.vesiculated	0.0010626	0.778374
aldicarb.resistant	0.0010567	0.778974
apoptosis.reduced	0.00104476	0.780195
paraquat.hypersensitive	0.000904269	0.795161
unfolded.protein.response.variant	0.000904269	0.795161
maternal.sterile	0.000902201	0.79539
intestinal.degeneration	0.000824557	0.804209
transgene.expression.variant	0.000818729	0.804888
nuclei.small	0.00076401	0.811397
pattern.of.transgene.expression.variant	0.000610728	0.831061
sterile.F1	0.000458938	0.853283
dauer.constitutive	0.000440378	0.856248
protein.metabolism.variant	0.000369619	0.868189
transgene.expression.undetectable	0.000328667	0.875644
germ.cell.compartment.expansion.variant	0.000242042	0.893171
pachytene.region.organization.variant	0.000242042	0.893171
embryonic.terminal.arrest.variable.emb	0.000197601	0.903423
terminal.arrest.variable	0.000197601	0.903423
thin	0.000150961	0.915539
slow.embryonic.development	0.000148003	0.916367
sluggish	0.000118629	0.925098
rachis.narrow	5.48682e-05	0.949021
oocyte.number.decreased	4.01019e-05	0.956409
organism.heat.response.variant	1.47303e-05	0.973573
sterile	7.22064e-07	0.994148

## Sheet: worm_Dim7
	R2	p.value
blistered	0.504065	4.83895e-13
RNAi.resistant	0.504065	4.83895e-13
somatic.transgene.silencing.variant	0.504065	4.83895e-13
slow.development	0.353264	1.2061e-08
embryonic.terminal.arrest.variable.emb	0.214941	2.17269e-05
terminal.arrest.variable	0.214941	2.17269e-05
pattern.of.transgene.expression.variant	0.21256	2.44627e-05
receptor.mediated.endocytosis.defective	0.191857	6.7777e-05
variable.cell.division.timing	0.162791	0.000274205
gonad.morphology.variant	0.145676	0.000614706
adult.lethal	0.137348	0.000907136
sister.cell.division.timing.asynchrony.reduced	0.137348	0.000907136
development.phenotype	0.129168	0.00132683
organism.morphology.variant	0.0920096	0.00732537
reduced.brood.size	0.0820629	0.0115438
RAB.11.recycling.endosome.localization.variant	0.0724773	0.0179033
oocytes.disorganized	0.0699346	0.0201181
extended.life.span	0.0690534	0.0209486
protruding.vulva	0.064082	0.0263297
accumulated.germline.cell.corpses	0.0518533	0.0463994
larval.arrest	0.050372	0.0497245
apoptosis.increased	0.0456525	0.0620635
diakinesis.region.organization.variant	0.0456525	0.0620635
gonad.degenerate	0.0456525	0.0620635
germ.cell.compartment.morphology.variant	0.04544	0.0626892
acetylcholine.synaptic.transmission.variant	0.0410322	0.0772645
evoked.postsynaptic.current.variant	0.0410322	0.0772645
levamisole.resistant	0.0410322	0.0772645
ligand.gated.channel.activity.variant	0.0410322	0.0772645
nicotine.resistant	0.0410322	0.0772645
postsynaptic.region.morphology.variant	0.0410322	0.0772645
nuclei.small	0.0400678	0.0809043
life.span.phenotype	0.0385044	0.0871958
diplotene.region.organization.variant	0.0345724	0.105436
lysosome.related.organelle.morphology.variant	0.0318382	0.120514
transgene.expression.increased	0.0313994	0.123145
dauer.constitutive	0.0308452	0.126556
oocyte.morphology.variant	0.0279042	0.146483
gonad.vesiculated	0.0255915	0.164599
male.gonad.development.variant	0.0251954	0.167946
male.somatic.gonad.development.variant	0.0251954	0.167946
fat.content.reduced	0.0251326	0.168484
protein.subcellular.localization.variant	0.0251326	0.168484
cell.membrane.organization.biogenesis.variant	0.0247259	0.172014
transgene.expression.variant	0.0236043	0.18219
germ.cell.development.variant	0.0232755	0.185302
RAB.11.recycling.endosome.morphology.variant	0.0225167	0.192717
diplotene.absent.during.oogenesis	0.0222034	0.195877
pathogen.resistance.increased	0.021888	0.199119
locomotion.variant	0.0218102	0.199928
developmental.delay.postembryonic	0.0215925	0.202213
late.larval.arrest	0.020455	0.214655
hermaphrodite.self.sterile	0.0203999	0.21528
male.sterile	0.0203999	0.21528
sperm.fertility.defective	0.0203999	0.21528
foraging.behavior.variant	0.0201854	0.217733
rachis.narrow	0.0201682	0.217931
sterile.progeny	0.0190726	0.231002
early.larval.arrest	0.0184616	0.238695
gonad.development.variant	0.018271	0.241156
paraquat.resistant	0.0169165	0.25956
aldicarb.resistant	0.0166316	0.263645
pachytene.progression.during.oogenesis.variant	0.0163455	0.267827
germ.cell.compartment.expansion.absent	0.0163263	0.26811
transgene.subcellular.localization.variant	0.0152262	0.284995
fewer.germ.cells	0.015197	0.285462
germ.cell.compartment.anucleate	0.0140411	0.304701
oocytes.lack.nucleus	0.0140411	0.304701
oocyte.number.decreased	0.0138907	0.307323
gonad.migration.variant	0.0136993	0.310704
growth.variant	0.0135248	0.313827
apoptosis.variant	0.011288	0.357755
peptide.uptake.by.intestinal.cell.decreased	0.0108939	0.366332
nuclei.enlarged	0.0104173	0.377085
endosome.biogenesis.variant	0.0101605	0.383063
lysosome.organization.biogenesis.variant	0.0101605	0.383063
reproductive.system.morphology.variant	0.0101605	0.383063
rachis.absent	0.00965096	0.395322
sluggish	0.00937494	0.402197
pleiotropic.defects.severe.early.emb	0.00855816	0.423586
embryo.osmotic.integrity.defective.early.emb	0.00825008	0.432091
larval.lethal	0.00805153	0.437708
clear	0.00744504	0.455574
sterile	0.00738862	0.457294
germ.cell.compartment.expansion.variant	0.00720805	0.462865
pachytene.region.organization.variant	0.00720805	0.462865
sick	0.00712143	0.465575
multiple.nuclei.early.emb	0.00705007	0.467827
gonad.arm.morphology.variant	0.00665405	0.480646
dumpy	0.00604649	0.501461
no.induction.of.antimicrobial.peptide.expression.after.infection	0.00571846	0.513337
apoptosis.fails.to.occur	0.0055162	0.520903
dead.eggs.laid	0.00539149	0.525666
oocytes.small	0.00532589	0.528202
distal.tip.cell.migration.variant	0.00524013	0.531551
distal.tip.cell.morphology.variant	0.00524013	0.531551
embryonic.lethal	0.00521079	0.532705
small	0.00496484	0.542562
transgene.expression.undetectable	0.00494165	0.543509
protein.metabolism.variant	0.00490644	0.544952
organism.heat.response.variant	0.00467718	0.554523
nuclear.appearance.variant	0.0046699	0.554832
rachis.morphology.variant	0.00439368	0.566804
germline.nuclear.positioning.variant	0.00435715	0.568425
maternal.sterile	0.00390015	0.589493
transposon.silencing.variant	0.00381762	0.593466
cytoplasmic.processing.body.variant	0.00371669	0.5984
molt.defect	0.00363913	0.60225
slow.growth	0.00357339	0.605553
dauer.lifespan.extended	0.00355708	0.606379
no.oocytes	0.00337273	0.615881
cell.secretion.variant	0.00319261	0.625483
oogenesis.variant	0.00308442	0.631413
gonad.small	0.00294754	0.6391
chromosome.segregation.variant.karyomeres.early.emb	0.00288442	0.642718
germ.cell.compartment.size.variant	0.00275653	0.650199
organism.development.variant	0.00253223	0.663838
paraquat.hypersensitive	0.00232552	0.677058
unfolded.protein.response.variant	0.00232552	0.677058
slow.embryonic.development	0.00229398	0.679135
L1.arrest	0.00213421	0.689919
embryonic.arrest	0.0020513	0.695702
oocyte.septum.formation.variant	0.00194348	0.703425
cell.differentiation.variant	0.00184662	0.710575
long	0.00154367	0.734416
protein.aggregation.variant	0.00152434	0.736023
heparan.sulfate.biosynthesis.variant	0.00150689	0.737484
P.granule.localization.defective	0.00150689	0.737484
presynaptic.vesicle.cluster.localization.variant	0.00150689	0.737484
thin	0.00123093	0.761948
germ.cell.partition.morphology.variant	0.00122089	0.762892
nuclear.fallout	0.00122089	0.762892
chromosome.condensation.variant	0.00104631	0.780036
giant.oocytes	0.000800202	0.807065
germ.cell.compartment.multinucleate	0.000762582	0.81157
germ.cell.compartment.small	0.000557713	0.838457
apoptosis.reduced	0.000405778	0.861953
avoids.bacterial.lawn	0.000383538	0.865753
patchy.coloration	0.00035217	0.871311
translation.variant	0.000177572	0.908426
lethal	2.05539e-05	0.968785
protein.complex.organization.variant	8.91952e-06	0.979434
sterile.F1	4.11682e-06	0.986027
axon.fasciculation.variant	1.55858e-06	0.991402
axon.midline.crossing.variant	1.55858e-06	0.991402
cord.commissures.fail.to.reach.target	1.55858e-06	0.991402
ventral.cord.patterning.variant	1.55858e-06	0.991402
intestinal.degeneration	1.20247e-06	0.992448
transgene.expression.reduced	8.68765e-07	0.993581
mRNA.surveillance.defective	2.89463e-08	0.998828
nonsense.mRNA.accumulation	2.89463e-08	0.998828

## Sheet: worm_Dim8
	R2	p.value
germ.cell.compartment.size.variant	0.331641	4.26357e-08
axon.fasciculation.variant	0.205063	3.54675e-05
axon.midline.crossing.variant	0.205063	3.54675e-05
cord.commissures.fail.to.reach.target	0.205063	3.54675e-05
ventral.cord.patterning.variant	0.205063	3.54675e-05
heparan.sulfate.biosynthesis.variant	0.185373	9.28683e-05
P.granule.localization.defective	0.185373	9.28683e-05
presynaptic.vesicle.cluster.localization.variant	0.185373	9.28683e-05
germ.cell.partition.morphology.variant	0.143259	0.000688347
nuclear.fallout	0.143259	0.000688347
giant.oocytes	0.12988	0.00128372
molt.defect	0.127945	0.00140422
germ.cell.compartment.multinucleate	0.109967	0.00321761
germ.cell.development.variant	0.0899867	0.00803531
patchy.coloration	0.0894865	0.0082212
fat.content.reduced	0.08748	0.00901108
protein.subcellular.localization.variant	0.08748	0.00901108
cytoplasmic.processing.body.variant	0.0868006	0.0092954
male.gonad.development.variant	0.086433	0.00945292
male.somatic.gonad.development.variant	0.086433	0.00945292
mRNA.surveillance.defective	0.0850322	0.0100782
nonsense.mRNA.accumulation	0.0850322	0.0100782
transgene.expression.increased	0.0736605	0.0169581
RAB.11.recycling.endosome.localization.variant	0.0735731	0.0170262
dumpy	0.0703759	0.0197147
endosome.biogenesis.variant	0.0673381	0.0226662
lysosome.organization.biogenesis.variant	0.0673381	0.0226662
reproductive.system.morphology.variant	0.0673381	0.0226662
transgene.expression.variant	0.0634061	0.0271626
life.span.phenotype	0.0623737	0.0284868
L1.arrest	0.0616325	0.0294778
lysosome.related.organelle.morphology.variant	0.060062	0.0316954
gonad.arm.morphology.variant	0.0587757	0.0336381
locomotion.variant	0.0524483	0.0451292
embryo.osmotic.integrity.defective.early.emb	0.052351	0.0453344
gonad.development.variant	0.0400848	0.0808387
diplotene.region.organization.variant	0.0400711	0.0808918
growth.variant	0.0389417	0.0853854
organism.morphology.variant	0.0373162	0.0923239
late.larval.arrest	0.0314177	0.123033
RAB.11.recycling.endosome.morphology.variant	0.0307396	0.127218
slow.growth	0.0299684	0.132166
extended.life.span	0.0297421	0.133658
dauer.constitutive	0.0290849	0.138096
acetylcholine.synaptic.transmission.variant	0.0238259	0.180126
evoked.postsynaptic.current.variant	0.0238259	0.180126
levamisole.resistant	0.0238259	0.180126
ligand.gated.channel.activity.variant	0.0238259	0.180126
nicotine.resistant	0.0238259	0.180126
postsynaptic.region.morphology.variant	0.0238259	0.180126
sick	0.0235078	0.183097
protruding.vulva	0.0233965	0.184149
adult.lethal	0.0212732	0.205619
sister.cell.division.timing.asynchrony.reduced	0.0212732	0.205619
pleiotropic.defects.severe.early.emb	0.0198802	0.221281
no.oocytes	0.0194602	0.226275
organism.development.variant	0.0194529	0.226363
fewer.germ.cells	0.01904	0.231405
development.phenotype	0.0180703	0.243781
diplotene.absent.during.oogenesis	0.0171483	0.256293
protein.aggregation.variant	0.0161615	0.27056
oogenesis.variant	0.0157585	0.276666
nuclei.enlarged	0.0150525	0.287782
sterile	0.0149366	0.289658
sterile.progeny	0.0146586	0.294225
oocytes.small	0.0144713	0.297354
germ.cell.compartment.expansion.absent	0.0142998	0.300256
developmental.delay.postembryonic	0.0126375	0.330351
pattern.of.transgene.expression.variant	0.0125265	0.332498
germ.cell.compartment.expansion.variant	0.011839	0.346212
pachytene.region.organization.variant	0.011839	0.346212
gonad.morphology.variant	0.0118311	0.346373
rachis.absent	0.0113059	0.357371
aldicarb.resistant	0.0102093	0.381917
clear	0.010091	0.384703
hermaphrodite.self.sterile	0.00969451	0.394253
male.sterile	0.00969451	0.394253
sperm.fertility.defective	0.00969451	0.394253
germ.cell.compartment.morphology.variant	0.00885143	0.415719
cell.differentiation.variant	0.008387	0.42828
sluggish	0.00817236	0.434277
oocyte.morphology.variant	0.00811579	0.435878
maternal.sterile	0.00805211	0.437692
nuclear.appearance.variant	0.00748598	0.454333
gonad.small	0.00708079	0.466855
apoptosis.fails.to.occur	0.00690466	0.47247
early.larval.arrest	0.0067133	0.478693
protein.complex.organization.variant	0.00635641	0.490661
receptor.mediated.endocytosis.defective	0.00609713	0.49967
no.induction.of.antimicrobial.peptide.expression.after.infection	0.00606269	0.500887
variable.cell.division.timing	0.00546894	0.522699
gonad.migration.variant	0.00506138	0.538654
pathogen.resistance.increased	0.00500471	0.540942
distal.tip.cell.migration.variant	0.00430899	0.570575
distal.tip.cell.morphology.variant	0.00430899	0.570575
rachis.morphology.variant	0.00417495	0.576643
dead.eggs.laid	0.0040022	0.584655
germ.cell.compartment.anucleate	0.00397007	0.586169
oocytes.lack.nucleus	0.00397007	0.586169
apoptosis.reduced	0.00385862	0.591486
gonad.vesiculated	0.00362737	0.602838
long	0.00339912	0.614501
organism.heat.response.variant	0.00315401	0.627584
germ.cell.compartment.small	0.00312585	0.629127
transgene.subcellular.localization.variant	0.00301698	0.635173
cell.membrane.organization.biogenesis.variant	0.00287632	0.643186
embryonic.arrest	0.00283436	0.645622
apoptosis.increased	0.00248466	0.666822
diakinesis.region.organization.variant	0.00248466	0.666822
gonad.degenerate	0.00248466	0.666822
slow.development	0.00226711	0.680917
slow.embryonic.development	0.0017577	0.717329
larval.arrest	0.0017115	0.720914
intestinal.degeneration	0.00163793	0.726737
protein.metabolism.variant	0.00137424	0.748904
multiple.nuclei.early.emb	0.00113702	0.77095
reduced.brood.size	0.00109011	0.775598
avoids.bacterial.lawn	0.000854678	0.800737
nuclei.small	0.000846422	0.801682
rachis.narrow	0.00079063	0.808201
translation.variant	0.000725931	0.816072
accumulated.germline.cell.corpses	0.000645127	0.826441
lethal	0.000645011	0.826456
chromosome.segregation.variant.karyomeres.early.emb	0.000446081	0.85533
germline.nuclear.positioning.variant	0.000371717	0.867819
peptide.uptake.by.intestinal.cell.decreased	0.00031934	0.877407
small	0.000287102	0.883714
sterile.F1	0.000251757	0.89106
oocytes.disorganized	0.000232363	0.895316
embryonic.terminal.arrest.variable.emb	0.000221183	0.897852
terminal.arrest.variable	0.000221183	0.897852
chromosome.condensation.variant	0.000209336	0.900611
apoptosis.variant	0.000200601	0.902696
transgene.expression.undetectable	0.000161515	0.912647
transgene.expression.reduced	0.000149733	0.915882
transposon.silencing.variant	0.000134436	0.920279
foraging.behavior.variant	0.000119831	0.924721
thin	7.2338e-05	0.941477
oocyte.number.decreased	6.23516e-05	0.94566
cell.secretion.variant	5.80613e-05	0.94756
pachytene.progression.during.oogenesis.variant	2.46838e-05	0.965794
paraquat.resistant	2.32337e-05	0.966814
paraquat.hypersensitive	1.58721e-05	0.972568
unfolded.protein.response.variant	1.58721e-05	0.972568
embryonic.lethal	9.54586e-06	0.978724
dauer.lifespan.extended	6.69991e-06	0.982175
oocyte.septum.formation.variant	5.96134e-06	0.983186
blistered	1.96077e-07	0.99695
RNAi.resistant	1.96077e-07	0.99695
somatic.transgene.silencing.variant	1.96077e-07	0.99695
larval.lethal	5.42393e-09	0.999493

[truncated: 4 more sheets: worm_Dim9, worm_Dim10, worm_Dim11, worm_genes_cos2]
