# Supplementary material for: Ribosomal proteins: mutant phenotypes by the numbers and associated gene expression changes
Source: Open Biol. 2020 Aug 19;10(8):200114. doi: 10.1098/rsob.200114 (PMC7479938; doi:10.1098/rsob.200114)
Supplement: Yeast MCA datasets [file rsob200114supp1.xlsx]

## Sheet: yeast_phenotypes
	acid pH resistance: decreased	acquired thermotolerance: decreased	alkaline pH resistance: decreased	anaerobic growth: decreased	autophagy: decreased	autophagy: increased	auxotrophy	biofilm formation: decreased	biofilm formation: increased	bud morphology: abnormal	budding index: decreased	budding pattern: abnormal	cell cycle progression in G1 phase: arrested or delayed	cell death: absent	cell death: decreased	cell shape: abnormal	cell size: decreased	cell size: increased	chemical compound accumulation: abnormal	chemical compound accumulation: decreased	chemical compound accumulation: increased	chemical compound excretion: increased	chitin deposition: decreased	chitin deposition: increased	chromosome/plasmid maintenance: abnormal	chromosome/plasmid maintenance: decreased	chronological lifespan: decreased	chronological lifespan: increased	cold sensitivity: decreased	cold sensitivity: increased	colony appearance: abnormal	colony sectoring: increased	competitive fitness: decreased	competitive fitness: increased	critical cell size at START (G1 cell-size checkpoint): decreased	critical cell size at START (G1 cell-size checkpoint): increased	desiccation resistance: decreased	desiccation resistance: increased	endocytosis: decreased	fermentative growth: decreased rate	filamentous growth: absent or decreased	freeze-thaw resistance: decreased	gamma ray resistance: decreased	growth in exponential phase: decreased rate	haploinsufficient	haploproficient	heat sensitivity: increased	hyperosmotic stress resistance: decreased	hyperosmotic stress resistance: increased
ASC1	n	n	n	n	n	y	n	y	n	n	n	n	n	n	n	n	n	y	y	y	n	n	n	y	n	n	y	n	n	n	n	n	y	n	n	n	n	n	y	n	n	n	y	n	n	y	y	n	n
RPL10	n	n	n	n	n	n	n	n	n	n	n	n	n	n	n	n	n	n	n	n	n	n	n	n	n	n	n	n	y	n	n	n	n	n	n	n	n	n	n	n	n	n	n	y	n	n	n	n	n
RPL11A	n	n	n	n	n	n	n	n	n	n	n	n	n	n	n	n	n	n	n	n	n	n	n	n	n	n	n	n	n	n	n	n	n	n	n	n	n	n	n	n	n	n	n	n	n	n	n	n	n
RPL11B	n	n	n	n	n	n	n	n	n	n	n	n	n	n	n	n	n	n	y	y	y	n	n	n	n	n	n	y	n	n	n	n	y	n	n	n	y	n	n	y	n	n	n	n	n	n	y	n	n
RPL12A	n	n	n	n	n	n	n	n	n	n	n	n	y	n	y	n	y	n	y	n	y	n	n	n	n	n	n	n	n	n	n	n	y	n	n	n	n	n	n	y	y	n	n	n	y	n	y	n	n
RPL12B	n	n	n	n	n	n	n	y	n	n	y	y	y	n	n	n	y	n	y	y	n	n	n	n	n	n	y	n	n	n	y	n	y	n	n	n	n	n	n	y	n	n	n	n	y	n	y	n	n
RPL13A	n	n	n	n	n	n	n	n	n	n	n	n	y	n	y	n	y	n	n	n	n	n	n	n	n	n	n	y	n	n	n	y	y	n	n	n	n	n	n	y	n	n	n	n	y	n	n	n	n
RPL13B	n	n	y	n	n	n	n	n	n	y	n	n	n	n	n	n	n	n	y	y	y	n	n	n	n	n	y	n	n	n	n	n	y	n	n	n	n	n	n	y	n	n	n	n	y	y	y	n	n
RPL14A	n	n	n	n	y	n	y	n	n	y	n	y	n	n	n	n	n	n	y	y	y	n	n	n	n	n	n	n	n	n	n	y	y	n	n	n	n	n	n	y	n	n	n	n	y	y	y	n	n
RPL14B	n	n	n	n	n	n	n	n	y	n	n	n	n	n	n	n	n	n	y	n	n	n	n	n	n	n	n	n	n	n	n	n	n	n	n	n	n	n	n	n	y	n	n	n	n	n	n	n	n
RPL15A	n	n	n	n	n	n	n	n	n	n	n	n	n	n	n	n	y	n	n	n	n	n	n	n	n	n	n	n	n	n	n	n	n	n	n	n	n	n	n	n	n	n	n	n	y	n	y	n	n
RPL15B	n	n	n	n	y	n	n	n	n	n	n	n	n	n	n	n	n	y	n	n	n	n	n	n	n	n	n	n	n	n	n	n	y	y	n	n	y	n	n	n	n	n	n	n	n	n	y	n	n
RPL16A	n	n	n	n	n	n	n	n	n	n	n	n	n	n	n	n	y	n	y	n	y	n	n	n	n	n	n	n	n	n	n	n	y	y	n	n	y	n	n	y	n	n	n	n	n	n	n	n	n
RPL16B	n	n	n	n	n	n	n	n	n	n	n	n	y	n	n	n	y	n	y	n	y	n	n	n	n	n	n	y	n	n	n	n	y	n	y	n	y	n	y	y	n	n	n	n	y	n	y	n	n
RPL17A	n	n	n	n	n	n	n	n	n	n	n	n	n	n	n	n	y	n	n	n	n	n	n	n	n	n	n	n	n	n	n	n	y	n	n	n	n	n	n	n	n	n	n	n	y	y	y	n	n
RPL17B	n	n	n	n	n	n	n	n	n	n	n	n	n	n	n	n	n	n	y	n	y	n	n	n	n	n	n	n	n	n	n	n	y	y	n	n	n	n	n	y	n	n	n	n	y	n	n	n	n
RPL18A	n	n	n	n	n	n	n	n	n	n	n	n	n	n	n	n	y	n	n	n	n	n	n	n	n	n	n	n	n	n	n	n	y	n	n	n	n	n	n	n	n	n	n	n	y	n	n	n	n
RPL18B	n	n	n	n	n	n	n	n	y	n	n	n	n	n	n	n	n	n	n	n	n	n	n	n	n	n	n	n	n	n	n	n	y	n	n	n	n	n	n	n	y	n	n	n	n	n	n	n	n
RPL19A	n	n	n	y	n	n	n	n	n	n	n	n	y	n	y	n	y	n	y	y	y	n	n	n	n	n	n	y	n	n	n	n	y	n	n	n	n	n	n	y	n	n	n	n	y	n	y	n	y
RPL19B	n	n	n	n	n	n	y	y	n	n	n	n	n	n	y	n	n	n	n	y	n	y	n	n	n	y	n	y	n	n	n	n	y	n	n	n	n	n	y	n	n	n	n	n	y	n	n	n	n
RPL1A	n	n	n	y	n	n	n	n	n	n	y	n	n	n	n	n	n	n	y	n	y	n	n	n	n	n	n	n	n	n	n	n	y	y	n	n	n	n	n	n	n	n	n	n	y	n	n	n	n
RPL1B	n	n	n	y	n	n	n	n	n	n	n	n	y	n	n	n	y	n	y	y	y	n	n	n	n	n	y	n	n	n	n	n	y	n	n	n	n	n	n	n	n	n	n	n	n	n	y	n	n
RPL20A	n	n	n	n	n	n	y	n	n	n	n	n	n	n	y	n	y	n	y	y	y	n	n	n	n	n	n	n	n	n	n	n	y	n	n	n	y	n	n	y	n	n	y	n	y	n	n	n	n
RPL20B	n	n	n	n	n	n	n	n	n	n	n	n	y	n	y	n	n	n	y	y	y	n	y	n	y	n	n	n	n	n	n	n	y	n	n	n	n	n	n	y	y	n	n	n	y	n	y	n	n
RPL21A	n	n	n	n	n	n	y	n	n	n	n	n	n	n	n	n	n	n	y	y	y	y	n	n	n	y	y	n	n	n	n	n	y	n	n	n	n	n	n	y	y	n	n	n	y	n	y	n	n
RPL21B	n	n	n	n	n	n	n	n	n	n	n	n	y	y	n	n	y	n	y	n	y	n	n	n	n	n	y	n	n	n	n	n	y	n	n	n	n	n	y	n	n	n	n	n	y	n	n	n	n
RPL22A	n	n	n	n	n	n	y	n	n	n	n	y	y	n	n	y	n	n	n	n	y	n	n	n	n	n	n	n	n	y	y	n	y	n	n	n	n	n	n	y	n	n	n	n	y	n	n	n	n
RPL22B	n	n	n	n	n	n	n	n	n	n	n	n	n	n	n	n	n	n	n	n	n	n	n	n	n	n	n	n	n	n	n	n	n	y	n	n	n	n	n	n	n	n	n	n	y	y	n	n	n
RPL23A	n	n	n	n	n	n	n	n	n	n	n	n	y	n	y	n	y	n	y	y	y	n	n	n	n	y	n	y	n	n	n	y	y	n	n	n	n	n	n	y	n	n	n	n	y	n	n	n	n
RPL23B	n	n	n	n	n	n	n	n	n	n	n	n	n	n	n	n	n	n	n	y	n	n	n	n	n	n	n	n	n	n	n	n	y	n	n	n	n	n	y	y	n	n	n	n	y	n	n	n	n
RPL24A	n	n	n	n	n	n	y	n	n	n	n	n	n	n	n	n	n	n	y	y	y	n	n	n	n	n	n	n	n	n	n	n	y	n	n	n	y	n	n	y	n	n	n	n	y	n	n	n	n
RPL24B	n	n	n	n	n	n	n	n	n	n	n	n	n	n	y	n	n	n	n	n	n	n	n	n	n	n	n	n	n	n	n	n	y	n	n	n	n	n	n	n	n	n	n	n	y	n	n	n	n
RPL25	n	n	n	n	n	n	n	n	n	n	n	n	n	n	n	n	n	n	n	n	n	n	n	n	n	n	n	n	n	n	n	n	y	n	n	n	n	n	n	n	n	n	n	y	y	n	n	n	n
RPL26A	n	n	n	y	n	n	n	n	y	n	n	n	n	n	n	n	n	n	n	n	n	n	n	n	n	n	n	n	n	n	n	n	y	n	n	n	n	n	n	n	n	n	n	n	n	n	n	n	n
RPL26B	n	n	n	n	n	n	n	n	n	n	n	n	n	n	n	n	n	n	y	n	y	n	n	n	n	n	n	n	n	n	n	n	y	n	n	n	n	n	n	n	n	n	n	n	y	n	y	y	n
RPL27A	n	n	y	n	n	n	y	n	n	y	n	y	y	n	n	y	n	n	y	y	n	n	n	n	n	n	n	y	n	n	n	n	y	n	n	n	y	n	n	y	n	y	n	n	y	n	y	n	n
RPL27B	n	n	n	n	n	n	n	n	n	n	n	n	n	n	n	n	n	n	y	n	n	n	n	n	n	n	n	y	n	n	n	n	y	n	n	n	n	n	n	y	n	n	n	n	y	n	n	n	n
RPL28	n	n	n	n	n	n	n	n	n	n	n	n	n	n	n	n	n	n	n	n	n	y	n	n	n	y	n	n	n	n	n	n	n	n	n	n	n	n	n	n	n	n	n	n	y	n	n	n	n
RPL29	n	n	n	n	n	n	n	n	n	n	n	n	y	n	y	n	n	n	y	y	n	n	n	n	n	n	n	n	n	n	n	n	y	n	n	n	y	n	n	n	n	n	n	n	n	n	n	y	n
RPL2A	n	n	n	n	n	n	n	n	n	n	n	n	n	n	y	n	n	n	n	y	n	n	n	n	n	n	n	n	n	n	n	n	y	y	n	n	y	n	y	n	n	n	n	n	n	y	y	n	n
RPL2B	n	n	n	n	n	n	n	n	n	y	n	n	n	n	n	n	y	n	n	n	y	y	n	n	n	n	n	n	n	n	n	n	y	n	n	n	n	n	n	n	n	n	n	n	y	n	y	n	n
RPL3	n	n	n	n	n	n	n	n	n	y	n	n	y	n	n	y	n	n	n	n	n	n	n	n	n	n	n	n	n	n	n	n	n	n	n	n	n	n	n	n	n	n	n	n	y	n	y	n	n
RPL30	n	n	n	n	n	n	n	n	n	n	n	n	n	n	n	n	y	n	n	n	n	n	n	n	y	y	n	n	n	n	n	y	y	n	n	n	n	n	n	n	n	n	n	n	y	n	y	n	n
RPL31A	y	n	n	n	n	n	n	n	n	n	n	n	y	n	n	n	y	n	y	y	y	n	n	n	n	y	y	n	n	n	n	n	y	n	n	n	n	n	y	n	n	n	n	n	y	n	y	n	n
RPL31B	n	n	n	n	n	n	n	n	n	n	n	n	n	n	y	n	n	n	n	n	n	n	n	n	n	n	n	n	n	n	n	n	y	n	n	n	n	n	n	n	n	n	n	n	n	y	n	n	n
RPL32	n	n	n	n	n	n	n	n	n	n	n	n	n	n	n	n	n	n	n	n	n	n	n	n	n	n	n	n	n	n	n	n	y	n	n	n	n	n	n	n	n	n	n	n	y	n	n	n	n
RPL33A	n	n	n	n	n	n	n	n	n	n	n	n	n	n	n	n	n	n	n	n	n	n	n	n	n	n	n	n	n	n	n	n	y	n	n	n	n	n	n	n	n	n	n	n	y	n	n	n	n
RPL33B	y	n	n	n	n	n	n	n	n	n	n	n	n	n	y	n	n	n	n	n	n	n	n	n	n	n	n	n	n	n	n	n	y	n	n	n	n	n	n	n	n	n	n	n	n	n	n	n	n
RPL34A	n	n	n	n	n	n	n	n	n	n	n	n	n	n	n	n	n	n	y	n	y	n	n	n	n	y	n	n	n	n	y	n	y	n	n	n	n	n	y	y	y	n	n	n	y	n	y	n	n
RPL34B	n	n	n	n	n	n	n	n	n	n	n	n	n	n	n	n	y	n	y	y	y	n	n	n	y	y	y	n	n	n	n	y	y	n	n	n	n	n	n	n	y	n	n	n	y	n	y	y	n
RPL35A	n	n	n	n	n	n	y	n	n	y	n	n	n	n	y	n	n	n	y	y	y	y	n	n	n	n	n	n	n	n	y	n	y	n	n	n	y	n	n	y	n	y	n	n	y	y	y	n	n
RPL35B	n	n	n	n	n	n	n	n	n	n	n	n	n	n	y	n	y	n	y	n	n	n	n	n	n	n	n	y	n	n	n	n	y	n	n	n	n	n	n	y	n	n	n	n	y	n	n	n	n
RPL36A	n	n	n	n	n	n	n	n	n	n	n	n	n	n	n	n	n	n	n	n	n	n	n	n	n	n	n	n	n	n	n	n	y	n	n	n	n	n	n	y	n	n	n	n	y	n	n	n	n
RPL36B	y	n	n	n	n	n	n	n	n	n	n	n	y	n	n	n	y	n	y	y	y	n	n	n	n	y	n	n	n	n	n	n	n	n	y	n	n	n	n	n	n	n	n	n	y	n	y	n	n
RPL37A	n	n	n	n	n	n	n	n	n	n	n	n	n	n	n	n	y	n	y	y	n	n	n	n	n	n	y	n	n	n	n	n	y	n	n	n	n	n	n	y	n	n	n	n	y	n	y	n	n
RPL37B	n	y	n	n	n	n	n	n	n	n	n	n	y	n	n	n	y	n	y	y	y	n	n	n	n	y	n	y	n	n	n	n	y	n	n	n	y	n	n	y	n	n	n	n	n	y	n	n	n
RPL38	n	n	n	n	n	n	n	n	n	n	n	n	n	n	n	n	n	n	n	n	n	n	n	n	n	n	n	y	n	n	n	n	y	y	n	n	n	n	n	n	n	n	n	n	n	n	n	n	n
RPL39	n	n	n	n	n	n	n	n	n	n	n	y	y	n	n	y	y	n	y	y	y	n	n	n	n	y	n	n	n	n	y	y	y	n	n	n	n	n	n	y	n	y	n	n	y	n	y	n	n
RPL40A	y	n	n	n	n	n	n	n	n	n	n	n	n	n	n	n	n	n	n	n	n	n	n	n	n	n	n	n	n	n	n	n	y	y	n	n	y	n	n	n	n	n	n	n	y	n	y	n	n
RPL40B	n	n	n	n	n	n	n	n	n	n	n	n	n	n	y	n	n	n	n	n	n	n	n	n	n	n	n	n	n	n	n	n	y	n	n	n	n	n	y	y	n	n	n	n	y	n	n	n	n
RPL41A	n	n	n	n	n	n	n	n	n	n	n	n	n	n	n	n	n	n	n	n	n	n	n	n	n	n	n	n	n	n	n	n	y	n	n	n	y	n	n	n	n	n	n	n	n	y	n	n	n
RPL41B	y	n	n	n	n	n	n	n	n	n	n	n	n	n	n	n	n	n	n	n	n	n	n	n	n	y	n	n	n	n	n	n	y	y	n	n	n	n	n	n	n	n	n	n	n	n	n	y	n
RPL42A	n	n	n	n	n	n	n	n	n	n	n	n	y	n	n	n	y	n	y	n	y	n	n	n	y	y	n	n	n	n	n	y	y	n	y	n	n	n	n	n	n	n	n	n	n	n	n	n	n
RPL42B	n	n	n	n	n	n	n	n	n	n	n	n	n	n	n	n	n	n	n	n	y	n	n	n	n	n	n	n	n	n	n	n	n	n	n	n	n	n	n	n	n	n	n	n	n	n	n	n	n
RPL43A	n	n	n	n	n	n	y	n	n	n	n	n	n	n	n	n	n	y	y	y	y	n	n	n	n	n	n	n	n	n	n	n	y	n	n	n	n	n	n	y	n	n	n	n	y	n	y	n	n
RPL43B	n	n	n	n	n	n	n	n	n	n	n	n	y	n	n	n	n	n	n	n	n	n	n	n	n	n	n	y	n	n	n	n	y	n	n	n	n	n	n	n	n	n	n	n	y	y	n	n	n
RPL4A	n	n	n	n	n	n	n	n	n	n	n	n	n	n	y	n	n	n	n	n	n	n	n	n	n	n	n	n	n	n	n	n	y	n	n	n	y	n	n	n	n	n	n	n	n	n	n	n	n
RPL5	n	n	n	n	n	n	n	n	n	n	n	n	n	n	n	n	y	n	n	n	n	n	n	n	n	n	n	n	n	n	n	n	y	n	n	n	n	y	n	n	n	n	n	y	y	n	y	n	n
RPL6A	n	n	n	n	n	n	n	n	n	n	n	n	n	n	n	n	n	n	n	n	y	n	n	n	n	n	n	n	n	n	y	n	y	n	n	n	y	n	n	n	n	n	n	n	y	n	y	n	n
RPL6B	n	n	n	n	n	n	n	n	n	n	n	n	y	n	n	n	n	n	y	y	y	n	n	n	n	n	n	y	n	n	n	n	y	n	n	n	n	n	n	y	n	n	n	n	y	n	y	n	n
RPL7A	n	n	n	n	n	n	n	n	n	n	n	y	y	n	y	n	y	n	y	y	y	n	n	n	n	n	n	n	n	n	n	n	y	n	n	n	n	n	y	y	n	n	n	n	y	n	y	n	n
RPL7B	n	n	n	n	n	n	n	n	n	n	n	n	n	n	n	n	n	n	n	n	n	n	n	n	n	n	n	n	n	n	n	n	y	n	n	n	n	n	n	n	n	n	n	n	y	n	n	y	n
RPL8A	n	y	n	n	n	n	n	n	n	n	n	n	y	n	y	n	n	n	y	y	y	n	n	n	n	n	n	n	n	n	n	n	y	y	n	n	y	n	n	n	n	n	n	n	y	n	n	y	n
RPL8B	n	n	n	n	n	n	n	y	n	n	n	n	y	n	y	n	y	n	n	n	n	n	n	n	n	n	n	n	n	n	n	n	y	n	n	n	y	n	n	y	n	n	n	n	y	n	y	n	n
RPL9A	n	n	n	n	n	n	n	n	n	n	n	n	y	n	y	n	n	n	y	y	n	n	n	n	n	n	n	y	n	n	n	n	y	n	n	n	y	n	n	y	n	n	n	n	y	n	y	n	n
RPL9B	n	n	n	n	n	n	n	n	n	n	n	n	n	n	y	n	n	n	y	n	y	n	n	n	n	y	n	n	n	n	n	y	y	n	n	n	n	n	n	n	n	n	n	n	n	n	n	y	n
RPP0	n	n	n	n	n	n	n	n	n	n	n	n	n	n	n	n	n	n	n	n	n	n	n	n	n	n	n	n	n	n	n	n	n	n	n	n	n	n	n	n	y	n	n	n	y	n	y	n	n
RPP1A	n	n	n	n	n	n	y	n	n	y	n	n	n	n	n	n	n	n	y	y	y	n	n	n	n	n	y	n	n	n	n	n	y	n	n	n	n	n	y	y	n	n	n	n	y	n	y	n	n
RPP1B	n	n	n	n	n	n	y	n	n	n	n	n	n	n	y	n	n	n	y	n	y	n	n	n	n	n	n	n	n	n	n	n	y	y	n	n	y	n	n	y	n	n	n	n	y	n	y	n	n
RPP2A	y	n	n	n	n	n	n	n	n	n	n	n	n	n	n	n	n	n	n	n	n	n	n	n	n	n	n	n	n	n	n	n	y	n	n	n	n	n	n	y	n	n	n	n	n	n	n	n	n
RPP2B	n	n	n	n	n	n	n	n	n	n	n	n	y	n	n	n	y	n	y	y	y	n	n	n	n	n	n	n	n	n	n	n	y	n	n	n	n	n	n	y	n	n	n	n	y	n	n	n	n
RPS0A	n	n	n	n	n	n	n	n	n	n	n	n	y	n	y	n	y	n	y	y	y	n	n	n	n	n	n	n	n	n	n	n	y	y	n	n	y	n	n	y	y	n	n	n	y	n	y	n	n
RPS0B	n	n	n	n	n	n	y	n	n	y	n	y	y	n	n	y	y	n	y	n	y	n	n	n	n	n	n	y	n	n	n	n	y	n	n	y	n	n	n	y	n	n	n	y	n	n	y	n	n
RPS10A	n	n	n	n	n	n	n	n	n	n	n	n	y	n	y	n	y	n	y	n	y	n	n	n	n	n	n	n	n	n	n	n	y	y	n	n	n	n	n	y	n	n	n	n	y	n	y	n	n
RPS10B	n	n	n	n	n	n	n	n	n	n	n	n	y	n	y	n	n	n	y	y	n	n	n	n	n	n	n	y	n	n	n	n	y	y	n	n	y	n	n	y	n	n	n	n	y	n	y	n	n
RPS11A	n	n	n	n	n	n	n	n	n	n	n	n	n	n	y	n	n	n	y	n	y	n	n	n	n	n	n	n	n	n	n	n	y	n	n	n	n	n	n	y	n	n	n	n	y	n	n	n	n
RPS11B	n	n	n	n	n	n	n	n	n	n	n	n	y	n	y	n	n	n	y	n	n	n	n	n	n	n	n	y	n	n	n	n	y	n	n	n	y	n	n	y	n	n	n	n	y	n	y	n	n
RPS12	n	n	n	n	n	n	n	n	n	y	n	n	n	n	n	n	n	y	y	n	y	n	n	n	n	n	y	n	n	n	y	n	y	n	n	n	n	n	n	n	n	n	n	n	n	n	n	n	n
RPS13	n	n	n	n	n	n	n	n	n	n	n	n	n	n	n	n	y	n	n	n	n	n	n	n	n	n	n	n	n	n	n	n	y	n	n	n	n	y	n	n	n	n	n	n	y	n	y	n	n
RPS14A	n	n	n	n	n	n	n	n	n	n	n	n	y	n	n	n	n	n	y	n	n	n	n	n	n	n	n	y	n	n	n	n	y	y	n	n	n	n	n	y	n	n	n	n	y	n	n	n	n
RPS14B	n	n	n	n	n	n	n	n	n	n	n	n	n	n	n	n	n	n	n	n	n	n	n	n	n	n	n	n	n	n	n	n	n	y	n	n	n	n	n	n	n	n	n	n	n	n	n	n	n
RPS15	n	n	n	n	n	n	n	n	n	n	n	n	n	n	n	n	y	n	n	n	n	n	n	n	n	n	n	n	n	n	n	n	y	n	n	n	n	n	n	n	n	n	n	n	y	n	y	n	n
RPS16A	y	n	n	n	n	n	n	n	n	n	n	n	n	n	y	n	n	n	y	y	y	n	n	n	n	n	n	n	n	n	n	n	y	n	n	n	n	n	n	y	n	n	n	n	y	n	y	n	n
RPS16B	n	n	n	n	n	n	y	n	n	n	n	n	y	n	y	n	y	n	y	n	n	n	n	n	n	n	n	n	n	n	n	n	y	n	n	n	n	n	n	y	n	n	n	n	n	n	n	n	n
RPS17A	n	n	n	n	n	n	n	n	n	n	n	y	y	n	n	y	n	n	y	y	y	n	n	n	n	n	n	n	n	n	n	n	y	n	n	n	y	n	n	y	n	n	n	n	y	n	y	n	n
RPS17B	n	n	n	n	n	n	n	n	n	n	n	n	n	n	n	n	n	n	y	n	y	n	n	n	n	n	n	y	n	n	n	n	y	y	n	n	n	n	n	n	n	n	n	n	n	n	n	n	n
RPS18A	n	n	n	n	n	n	n	n	n	n	n	n	y	n	n	n	y	n	y	y	y	n	n	n	n	y	n	n	n	n	n	y	y	n	n	n	n	n	n	y	n	n	n	y	y	n	y	n	n
RPS18B	n	n	n	n	n	n	n	n	n	n	n	y	y	n	y	n	y	n	y	y	n	n	n	n	n	n	n	y	n	n	n	n	y	n	n	n	n	n	n	y	n	n	n	y	y	n	y	n	n
RPS19A	n	n	n	n	n	n	y	n	n	n	n	n	n	n	y	n	n	n	y	n	y	n	n	n	n	n	n	n	n	n	n	n	y	y	n	n	n	n	n	y	n	n	n	n	y	n	y	n	n
RPS19B	n	n	n	n	n	n	n	n	n	n	n	n	n	n	n	n	y	n	y	n	n	n	n	n	n	n	n	y	n	n	n	n	y	n	n	n	n	n	n	n	y	n	n	n	y	n	n	n	n
RPS1A	n	n	n	n	n	n	n	n	n	n	n	n	n	n	n	n	n	n	n	n	n	n	n	n	n	n	n	y	n	n	n	n	y	y	n	n	y	n	n	n	n	n	n	n	y	n	y	n	n
RPS1B	n	n	n	n	n	n	n	n	n	n	n	y	y	n	n	n	y	n	n	n	y	n	n	n	n	n	n	n	n	n	n	n	y	n	n	n	y	n	n	y	n	n	n	n	y	n	y	n	n
RPS2	n	n	n	n	n	n	n	n	n	n	n	n	n	n	n	n	n	n	n	n	n	n	n	n	n	n	n	n	n	n	n	n	y	n	n	n	n	n	n	n	n	n	n	n	y	n	y	n	n
RPS20	n	n	n	n	n	n	n	n	n	n	n	n	n	n	n	n	n	n	n	n	n	n	n	n	y	y	n	n	n	n	n	n	y	n	n	n	n	n	n	n	n	n	n	n	y	n	y	n	n
RPS21A	n	n	n	n	n	n	n	n	n	n	n	n	n	n	n	n	y	n	y	n	y	n	n	n	n	n	n	y	n	n	n	n	y	n	n	n	n	n	n	y	n	n	n	n	y	n	y	n	n
RPS21B	n	n	n	n	n	n	n	n	n	n	n	n	y	n	n	n	n	y	y	y	y	n	n	n	n	n	y	n	n	n	n	n	y	n	n	n	n	n	n	y	n	n	n	n	y	n	y	n	n
RPS22A	n	n	n	n	n	n	n	n	n	n	n	n	n	n	n	n	n	n	n	n	n	n	n	n	n	n	n	y	n	n	n	n	y	n	n	n	n	n	n	n	n	n	n	n	y	n	n	n	n
RPS22B	n	n	n	n	n	n	n	n	n	n	n	n	n	n	y	n	n	n	y	n	n	n	n	n	n	n	n	n	n	n	n	n	y	n	n	n	n	n	n	n	n	n	n	n	n	n	n	n	n
RPS23A	n	n	n	n	n	n	n	n	n	n	n	n	y	n	y	n	n	n	n	n	n	n	n	n	n	n	n	n	n	n	n	n	y	y	n	n	y	n	n	y	n	n	n	n	y	n	y	n	n
RPS23B	n	n	n	n	n	n	n	n	n	n	y	n	y	n	n	n	n	n	y	n	y	n	n	n	n	n	n	n	n	n	n	n	y	n	n	n	n	n	n	y	n	n	n	n	y	n	y	n	n
RPS24A	n	n	n	n	n	n	n	n	n	n	n	n	y	n	n	n	n	n	y	n	y	n	n	n	n	n	n	y	n	n	n	n	y	n	n	n	n	n	y	y	n	n	n	n	y	n	y	n	n
RPS24B	n	n	n	n	n	n	n	n	n	n	n	n	n	n	n	n	n	n	n	n	y	n	n	n	n	n	n	n	n	n	n	n	y	y	n	n	n	n	n	n	n	n	n	n	n	n	n	n	n
RPS25A	n	n	n	n	n	n	n	n	n	n	n	n	y	n	n	n	n	n	n	y	y	n	n	n	n	n	n	n	n	n	n	n	y	n	n	n	n	n	n	n	n	n	n	n	y	n	y	y	n
RPS25B	n	n	n	n	n	n	n	n	n	n	n	n	n	n	n	n	n	n	y	n	y	n	n	n	n	n	n	n	n	n	n	n	y	n	n	n	n	n	n	n	n	n	n	n	n	n	n	n	n
RPS26A	n	n	n	n	n	n	n	n	n	n	n	n	n	n	n	n	n	n	n	n	n	n	n	n	n	n	n	n	n	y	n	n	n	n	n	n	n	n	n	n	y	n	n	n	n	n	n	n	n
RPS26B	n	n	n	n	n	n	n	n	n	n	n	n	n	n	n	n	n	n	n	n	n	n	n	n	n	n	n	n	n	n	n	n	y	n	n	n	n	n	n	n	n	n	n	n	y	n	n	n	n
RPS27A	n	n	n	n	n	n	n	n	y	n	n	n	n	n	n	n	n	n	n	n	n	n	n	n	n	n	n	y	n	n	n	n	n	y	n	n	n	n	n	n	y	n	n	n	n	n	n	n	n
RPS27B	y	n	n	n	n	n	n	n	n	y	n	y	y	n	n	y	n	y	y	y	y	n	n	n	n	n	y	y	n	n	n	n	y	n	n	n	y	n	n	y	n	n	n	y	y	n	y	n	n
RPS28A	n	n	n	n	n	n	n	n	n	n	n	n	n	n	n	n	n	n	n	n	n	n	n	n	n	n	n	n	n	n	n	n	y	y	n	n	n	n	n	n	n	n	n	n	y	n	y	n	n
RPS28B	n	n	n	n	n	n	n	n	n	n	n	y	y	n	n	y	y	n	y	y	y	y	n	n	n	n	n	y	n	n	n	n	y	n	n	n	n	n	n	y	n	n	n	n	y	n	y	n	n
RPS29A	n	n	n	n	n	n	n	n	n	n	n	y	y	n	y	n	n	n	y	n	y	n	n	n	n	n	n	y	n	n	n	n	y	n	n	n	n	n	n	y	n	n	n	n	y	n	y	n	n
RPS29B	n	n	n	n	n	n	n	n	n	n	n	n	n	n	n	n	y	n	y	n	n	n	n	n	n	n	n	y	n	n	n	n	y	y	n	n	n	n	n	y	n	y	n	n	y	n	n	n	n
RPS3	n	n	n	n	n	n	n	n	n	n	n	n	n	n	n	n	n	n	n	n	n	n	n	n	n	n	n	n	n	n	n	n	y	n	n	n	n	n	n	n	n	n	n	n	y	n	y	n	n
RPS30A	n	n	n	n	n	n	n	n	n	n	n	y	n	n	y	n	n	n	n	n	n	n	n	n	n	n	n	n	n	n	n	n	y	y	n	n	n	n	n	y	n	n	n	n	y	y	y	n	n
RPS30B	n	n	n	n	n	n	n	n	n	n	n	n	n	n	n	n	n	n	n	y	n	n	n	n	n	n	n	n	n	n	n	n	y	n	n	n	y	n	n	y	n	n	n	n	n	n	y	n	n
RPS31	n	n	n	n	n	n	n	n	n	n	n	n	n	n	n	n	n	n	n	n	n	n	n	n	n	n	n	n	n	n	n	n	y	n	n	n	n	n	n	n	n	n	n	n	y	n	n	n	n
RPS4A	n	n	n	n	n	n	n	n	n	n	n	n	y	n	n	n	n	y	y	n	y	n	n	n	n	n	n	n	n	n	n	y	y	n	n	n	n	n	n	y	n	n	n	n	y	n	y	n	n
RPS4B	n	n	n	n	n	n	n	n	n	n	n	n	n	n	n	n	n	n	y	y	n	n	n	n	n	n	n	y	n	n	n	n	y	y	n	n	n	n	n	y	n	n	n	n	y	n	y	n	n
RPS5	n	n	n	n	n	n	n	n	n	n	n	n	n	n	n	n	n	n	n	n	n	n	n	n	n	n	n	n	n	n	n	n	y	n	n	n	n	n	n	n	n	n	n	n	y	n	y	n	n
RPS6A	n	n	n	n	n	n	n	n	n	n	n	n	y	n	n	n	y	n	y	y	y	n	n	n	n	n	n	n	n	n	n	n	y	n	n	n	n	n	n	y	n	n	n	y	y	n	y	n	n
RPS6B	n	n	n	n	n	n	n	y	n	n	y	n	y	n	y	n	y	n	y	y	y	n	n	n	n	n	n	y	n	n	n	n	y	y	n	n	n	n	n	y	n	n	n	y	n	n	y	n	n
RPS7A	n	n	n	n	n	n	y	y	n	n	y	y	y	n	n	y	n	n	y	n	y	n	n	n	n	n	n	n	n	n	n	n	y	n	n	n	n	n	n	y	n	n	n	n	y	n	y	n	n
RPS7B	n	n	n	n	n	n	n	n	n	n	n	n	n	n	n	n	n	n	n	n	n	n	n	n	n	n	n	y	n	n	n	y	y	n	n	n	n	n	n	y	n	n	n	n	y	n	n	n	n
RPS8A	n	n	n	y	n	n	n	n	n	n	n	n	n	n	y	n	y	n	y	y	y	y	n	y	n	n	n	n	n	n	n	y	y	y	n	n	n	n	n	y	n	n	n	n	y	n	n	n	n
RPS8B	n	n	n	n	n	n	n	n	n	n	n	n	n	n	n	n	n	n	n	n	n	n	n	n	n	n	n	n	n	n	n	n	n	n	n	n	n	n	n	n	n	n	n	n	n	n	n	n	n
RPS9A	n	n	n	n	n	n	n	n	n	n	n	n	n	n	n	n	n	n	n	n	n	n	n	n	n	n	n	n	n	n	n	n	y	y	n	n	n	n	n	n	n	n	n	n	n	n	n	n	n
RPS9B	n	n	n	n	n	n	y	n	n	n	n	n	y	n	n	n	n	n	y	y	n	n	n	n	y	n	n	n	n	n	n	n	y	n	n	n	y	n	n	y	n	n	n	n	y	n	n	n	n
[truncated: 62 more columns]

## Sheet: yeast_eigen
	eigenvalue	percentage of variance	cumulative percentage of variance
dim 1	0.00546243	21.9442	21.9442
dim 2	0.00321392	12.9113	34.8555
dim 3	0.00187284	7.52376	42.3792
dim 4	0.00166519	6.68957	49.0688
dim 5	0.00126265	5.07245	54.1413
dim 6	0.00103519	4.15865	58.2999
dim 7	0.000805826	3.23724	61.5372
dim 8	0.000731604	2.93907	64.4762
dim 9	0.000675217	2.71255	67.1888
dim 10	0.000589419	2.36787	69.5567
dim 11	0.000556965	2.2375	71.7941
dim 12	0.000502616	2.01916	73.8133
dim 13	0.000484729	1.9473	75.7606
dim 14	0.000431271	1.73255	77.4932
dim 15	0.000406999	1.63503	79.1282
dim 16	0.000350239	1.40702	80.5352
dim 17	0.000339688	1.36463	81.8998
dim 18	0.000284798	1.14412	83.044
dim 19	0.000267263	1.07368	84.1176
dim 20	0.000244576	0.982537	85.1002
dim 21	0.000235777	0.947187	86.0474
dim 22	0.000222842	0.895223	86.9426
dim 23	0.000214013	0.859753	87.8023
dim 24	0.000194708	0.7822	88.5845
dim 25	0.000184555	0.741412	89.3259
dim 26	0.000166844	0.670261	89.9962
dim 27	0.000160418	0.644446	90.6406
dim 28	0.000152005	0.610648	91.2513
dim 29	0.000150447	0.604391	91.8557
dim 30	0.000141769	0.569529	92.4252
dim 31	0.000126983	0.510129	92.9353
dim 32	0.0001219	0.489708	93.425
dim 33	0.000116775	0.469122	93.8942
dim 34	0.000112521	0.452032	94.3462
dim 35	0.000104923	0.421506	94.7677
dim 36	9.62557e-05	0.386688	95.1544
dim 37	8.50428e-05	0.341642	95.496
dim 38	8.22701e-05	0.330503	95.8265
dim 39	8.1641e-05	0.327976	96.1545
dim 40	7.10559e-05	0.285453	96.44
dim 41	6.75463e-05	0.271354	96.7113
dim 42	6.43813e-05	0.258639	96.97
dim 43	6.00877e-05	0.24139	97.2114
dim 44	5.8291e-05	0.234172	97.4455
dim 45	5.38331e-05	0.216263	97.6618
dim 46	5.20038e-05	0.208915	97.8707
dim 47	4.77617e-05	0.191873	98.0626
dim 48	4.22503e-05	0.169732	98.2323
dim 49	3.79168e-05	0.152323	98.3846
dim 50	3.42542e-05	0.137609	98.5222
dim 51	2.84393e-05	0.114249	98.6365
dim 52	2.709e-05	0.108828	98.7453
dim 53	2.58939e-05	0.104024	98.8493
dim 54	2.52744e-05	0.101535	98.9509
dim 55	2.23972e-05	0.0899762	99.0409
dim 56	2.14167e-05	0.0860374	99.1269
dim 57	1.94475e-05	0.0781266	99.205
dim 58	1.8201e-05	0.0731188	99.2781
dim 59	1.76062e-05	0.0707292	99.3489
dim 60	1.5142e-05	0.0608299	99.4097
dim 61	1.40787e-05	0.0565582	99.4663
dim 62	1.30222e-05	0.0523142	99.5186
dim 63	1.14954e-05	0.0461806	99.5647
dim 64	1.03121e-05	0.0414269	99.6062
dim 65	9.78414e-06	0.0393058	99.6455
dim 66	9.37471e-06	0.037661	99.6831
dim 67	8.64903e-06	0.0347458	99.7179
dim 68	8.26812e-06	0.0332155	99.7511
dim 69	7.52839e-06	0.0302438	99.7813
dim 70	6.33597e-06	0.0254535	99.8068
dim 71	6.12463e-06	0.0246045	99.8314
dim 72	5.67735e-06	0.0228076	99.8542
dim 73	4.6824e-06	0.0188106	99.873
dim 74	3.95437e-06	0.0158859	99.8889
dim 75	3.48942e-06	0.014018	99.9029
dim 76	3.07431e-06	0.0123504	99.9153
dim 77	2.80197e-06	0.0112563	99.9265
dim 78	2.68281e-06	0.0107777	99.9373
dim 79	2.1513e-06	0.00864242	99.946
dim 80	1.74637e-06	0.00701571	99.953
dim 81	1.63494e-06	0.00656805	99.9595
dim 82	1.46148e-06	0.00587122	99.9654
dim 83	1.27222e-06	0.00511088	99.9705
dim 84	1.10525e-06	0.00444013	99.975
dim 85	9.65325e-07	0.003878	99.9788
dim 86	8.33378e-07	0.00334793	99.9822
dim 87	7.34573e-07	0.002951	99.9851
dim 88	7.19578e-07	0.00289076	99.988
dim 89	4.89518e-07	0.00196654	99.99
dim 90	4.61797e-07	0.00185518	99.9919
dim 91	4.06344e-07	0.00163241	99.9935
dim 92	3.18287e-07	0.00127865	99.9948
dim 93	2.69712e-07	0.00108351	99.9958
dim 94	2.36564e-07	0.00095035	99.9968
dim 95	1.93072e-07	0.000775626	99.9976
dim 96	1.75322e-07	0.000704322	99.9983
dim 97	1.28684e-07	0.000516963	99.9988
dim 98	1.07661e-07	0.000432506	99.9992
dim 99	6.60677e-08	0.000265414	99.9995
dim 100	3.9356e-08	0.000158105	99.9996
dim 101	3.28008e-08	0.00013177	99.9998
dim 102	2.33462e-08	9.37886e-05	99.9999
dim 103	1.43932e-08	5.78217e-05	99.9999
dim 104	1.14281e-08	4.59102e-05	100
dim 105	4.00835e-09	1.61027e-05	100
dim 106	1.61689e-09	6.49555e-06	100
dim 107	7.4532e-64	2.99417e-60	100
dim 108	1.88529e-64	7.57378e-61	100
dim 109	3.28634e-65	1.32022e-61	100
dim 110	2.39953e-65	9.63964e-62	100
dim 111	2.15268e-65	8.64796e-62	100

## Sheet: yeast_Dim1
	R2	p.value
chemical.compound.accumulation..decreased	0.34471	4.68445e-14
chemical.compound.accumulation..abnormal	0.325103	3.52469e-13
autophagy..increased	0.30588	2.41605e-12
pheromone.sensitivity..increased	0.30588	2.41605e-12
protein.peptide.modification..increased	0.30588	2.41605e-12
resistance.to.chemicals..increased	0.290759	1.06019e-11
resistance.to.enzymatic.treatment..decreased	0.278921	3.30526e-11
pseudohyphal.growth..absent.or.decreased	0.276873	4.01673e-11
chronological.lifespan..decreased	0.263411	1.42853e-10
gamma.ray.resistance..decreased	0.251277	4.40142e-10
mating.response..increased	0.242821	9.54661e-10
fermentative.growth..decreased.rate	0.230567	2.89137e-09
vegetative.growth..decreased	0.222488	5.95116e-09
chemical.compound.accumulation..increased	0.220792	6.91865e-09
protein.peptide.distribution..abnormal	0.214007	1.26059e-08
chitin.deposition..increased	0.195273	6.45241e-08
respiratory.growth..absent.or.decreased.rate	0.195193	6.49691e-08
inviable	0.192942	7.88747e-08
killer.toxin.resistance..decreased	0.179971	2.39015e-07
stress.resistance..increased	0.173204	4.2372e-07
replicative.lifespan..increased	0.143234	5.11537e-06
transposable.element.transposition..increased	0.136412	8.93423e-06
cell.cycle.progression.in.G1.phase..arrested.or.delayed	0.13386	1.09975e-05
competitive.fitness..decreased	0.133356	1.14577e-05
budding.pattern..abnormal	0.130698	1.4218e-05
biofilm.formation..decreased	0.128501	1.69894e-05
cell.size..increased	0.12168	2.94754e-05
auxotrophy	0.117987	3.96706e-05
resistance.to.chemicals..decreased	0.117522	4.11802e-05
heat.sensitivity..increased	0.117368	4.16948e-05
transposable.element.transposition..decreased	0.113071	5.88483e-05
endocytosis..decreased	0.108731	8.32567e-05
bud.morphology..abnormal	0.103768	0.000123675
telomere.length..decreased	0.0977935	0.000198823
RNA.localization..abnormal	0.0852747	0.00053527
cell.shape..abnormal	0.0762653	0.00108871
vacuolar.morphology..abnormal	0.0680033	0.00208568
sporulation..decreased	0.0651492	0.00261078
mutation.frequency..increased	0.0635803	0.00295388
colony.appearance..abnormal	0.0619379	0.00336155
metal.resistance..decreased	0.0566509	0.00509873
alkaline.pH.resistance..decreased	0.0534269	0.00657637
oxidative.stress.resistance..increased	0.0523689	0.00714987
protein.peptide.accumulation..decreased	0.0436162	0.0143198
haploproficient	0.0406241	0.0181861
utilization.of.nitrogen.source..absent.or.decreased	0.0403723	0.0185565
telomere.length..increased	0.0382846	0.02194
lipid.particle.morphology..abnormal	0.0378404	0.0227378
toxin.resistance..increased	0.0315463	0.0378574
mitophagy..absent.or.decreased	0.0306644	0.0406873
biofilm.formation..increased	0.0304508	0.0414052
resistance.to.enzymatic.treatment..increased	0.0270871	0.0546239
cell.size..decreased	0.0265719	0.0570093
respiratory.growth..increased	0.0262979	0.0583223
osmotic.stress.resistance..decreased	0.0249408	0.0653102
freeze.thaw.resistance..decreased	0.0237801	0.0719871
X.ray.resistance..decreased	0.0234809	0.0738231
vegetative.growth..abnormal	0.0229901	0.0769434
desiccation.resistance..decreased	0.021487	0.0874046
haploinsufficient	0.0201092	0.0983381
nuclear.export..decreased	0.0196988	0.101873
desiccation.resistance..increased	0.0194974	0.103658
RNA.accumulation..decreased	0.0193325	0.105145
UV.resistance..decreased	0.0178753	0.119337
competitive.fitness..increased	0.0176084	0.122156
mitochondrial.genome.maintenance..absent	0.0169604	0.12931
mitophagy..increased	0.0169604	0.12931
metal.resistance..increased	0.0165528	0.134046
chemical.compound.excretion..increased	0.0162455	0.137743
RNA.accumulation..abnormal	0.0147011	0.158132
critical.cell.size.at.START..G1.cell.size.checkpoint...increased	0.0146105	0.159428
innate.thermotolerance..decreased	0.0137739	0.171993
cell.death..decreased	0.0134879	0.176543
nutrient.utilization..decreased	0.0129937	0.184733
chronological.lifespan..increased	0.01241	0.194977
colony.sectoring..increased	0.0111336	0.219768
sporulation.efficiency..increased	0.0105215	0.232968
cold.sensitivity..decreased	0.0102946	0.238099
invasive.growth..absent.or.decreased	0.0102676	0.238718
budding.index..decreased	0.00956225	0.25562
mating.response..absent.or.decreased	0.00885182	0.274146
utilization.of.carbon.source..decreased	0.0084206	0.286207
toxin.resistance..decreased	0.00831024	0.2894
mitochondrial.morphology..abnormal	0.00582238	0.375493
anaerobic.growth..decreased	0.00534061	0.396064
ionic.stress.resistance..decreased	0.00486003	0.418234
innate.thermotolerance..increased	0.00474042	0.424034
autophagy..decreased	0.00467117	0.427447
chromosome.plasmid.maintenance..decreased	0.00422262	0.450597
filamentous.growth..absent.or.decreased	0.00414663	0.454709
starvation.resistance..decreased	0.00405967	0.459488
cold.sensitivity..increased	0.00398964	0.463394
growth.in.exponential.phase..decreased.rate	0.00390711	0.468065
hyperosmotic.stress.resistance..increased	0.00328961	0.505589
acquired.thermotolerance..decreased	0.00303551	0.522529
lifespan..increased	0.00291368	0.531007
protein.peptide.accumulation..increased	0.00267055	0.548688
killer.toxin.resistance..increased	0.00243175	0.567152
stress.resistance..decreased	0.00210896	0.594119
redox.state..abnormal	0.00201203	0.602734
protein.activity..increased	0.00155728	0.647066
utilization.of.phosphorus.source..decreased	0.00132468	0.672847
hyperosmotic.stress.resistance..decreased	0.000824366	0.739095
acid.pH.resistance..decreased	0.000794363	0.743719
chitin.deposition..decreased	0.000736598	0.752901
cell.death..absent	0.000594265	0.777361
replicative.lifespan..decreased	0.000515956	0.792191
chromosome.plasmid.maintenance..abnormal	0.000250711	0.854293
critical.cell.size.at.START..G1.cell.size.checkpoint...decreased	8.459e-05	0.915053
prion.formation..increased	5.92363e-05	0.928874
oxidative.stress.resistance..decreased	5.03525e-05	0.934411

## Sheet: yeast_Dim2
	R2	p.value
autophagy..increased	0.580799	2.91873e-27
pheromone.sensitivity..increased	0.580799	2.91873e-27
protein.peptide.modification..increased	0.580799	2.91873e-27
transposable.element.transposition..increased	0.379995	1.06595e-15
chitin.deposition..increased	0.301163	3.84467e-12
gamma.ray.resistance..decreased	0.299392	4.57387e-12
pseudohyphal.growth..absent.or.decreased	0.281903	2.48617e-11
fermentative.growth..decreased.rate	0.280295	2.89932e-11
cell.cycle.progression.in.G1.phase..arrested.or.delayed	0.213031	1.37363e-08
chemical.compound.accumulation..increased	0.179045	2.5855e-07
chemical.compound.accumulation..abnormal	0.151864	2.51444e-06
resistance.to.chemicals..increased	0.149136	3.14917e-06
invasive.growth..absent.or.decreased	0.126883	1.9367e-05
mating.response..increased	0.121511	2.98777e-05
vegetative.growth..decreased	0.116625	4.42559e-05
budding.pattern..abnormal	0.098867	0.000182586
haploinsufficient	0.0964378	0.000221393
replicative.lifespan..increased	0.0821837	0.000683038
cell.size..increased	0.0758668	0.00112341
competitive.fitness..decreased	0.0755839	0.0011487
chronological.lifespan..increased	0.0735251	0.00135075
chemical.compound.accumulation..decreased	0.0721613	0.00150376
cell.size..decreased	0.0674516	0.00217818
inviable	0.066247	0.00239472
haploproficient	0.0578182	0.00465036
toxin.resistance..increased	0.056903	0.00499834
cell.death..decreased	0.0547948	0.00590294
stress.resistance..increased	0.0547627	0.00591792
protein.peptide.distribution..abnormal	0.05247	0.00709297
resistance.to.chemicals..decreased	0.0504903	0.00829548
cell.shape..abnormal	0.0502692	0.00844201
desiccation.resistance..decreased	0.0480561	0.0100604
biofilm.formation..decreased	0.0466912	0.0112117
auxotrophy	0.0454611	0.0123633
heat.sensitivity..increased	0.0453243	0.0124986
sporulation..decreased	0.040743	0.0180138
RNA.localization..abnormal	0.0382172	0.0220592
freeze.thaw.resistance..decreased	0.0367401	0.0248444
oxidative.stress.resistance..increased	0.0339551	0.0311191
biofilm.formation..increased	0.0328742	0.0339748
bud.morphology..abnormal	0.0293533	0.0453066
endocytosis..decreased	0.0256424	0.0615938
utilization.of.nitrogen.source..absent.or.decreased	0.0254178	0.0627586
resistance.to.enzymatic.treatment..decreased	0.0218063	0.085061
innate.thermotolerance..increased	0.0195656	0.10305
critical.cell.size.at.START..G1.cell.size.checkpoint...increased	0.0191255	0.107044
colony.appearance..abnormal	0.0183418	0.114579
colony.sectoring..increased	0.017918	0.118892
utilization.of.carbon.source..decreased	0.0177185	0.120984
starvation.resistance..decreased	0.017399	0.124419
protein.peptide.accumulation..decreased	0.0168183	0.13094
vacuolar.morphology..abnormal	0.0165004	0.134669
metal.resistance..decreased	0.0157637	0.143771
lipid.particle.morphology..abnormal	0.0156334	0.14545
nuclear.export..decreased	0.0117866	0.206651
growth.in.exponential.phase..decreased.rate	0.0117231	0.207885
metal.resistance..increased	0.0112864	0.216614
alkaline.pH.resistance..decreased	0.0106286	0.230592
telomere.length..decreased	0.0106219	0.230738
chronological.lifespan..decreased	0.0100039	0.244873
acquired.thermotolerance..decreased	0.00984489	0.248679
chromosome.plasmid.maintenance..decreased	0.00967518	0.252819
budding.index..decreased	0.00896185	0.271171
hyperosmotic.stress.resistance..increased	0.00890978	0.272574
respiratory.growth..absent.or.decreased.rate	0.00878318	0.276023
RNA.accumulation..abnormal	0.00843439	0.285811
desiccation.resistance..increased	0.00713084	0.326547
RNA.accumulation..decreased	0.00702397	0.330212
telomere.length..increased	0.00633258	0.355297
chemical.compound.excretion..increased	0.00596125	0.369842
innate.thermotolerance..decreased	0.0051885	0.402893
mating.response..absent.or.decreased	0.00429838	0.446554
killer.toxin.resistance..increased	0.00425382	0.448925
killer.toxin.resistance..decreased	0.00422777	0.45032
cold.sensitivity..increased	0.00418966	0.452374
cold.sensitivity..decreased	0.00407281	0.458761
nutrient.utilization..decreased	0.00402544	0.46139
critical.cell.size.at.START..G1.cell.size.checkpoint...decreased	0.00381585	0.473319
osmotic.stress.resistance..decreased	0.00369512	0.480416
chitin.deposition..decreased	0.00360749	0.485678
filamentous.growth..absent.or.decreased	0.00348404	0.493252
mitochondrial.morphology..abnormal	0.00291396	0.530987
chromosome.plasmid.maintenance..abnormal	0.00270113	0.546405
toxin.resistance..decreased	0.00263711	0.551205
resistance.to.enzymatic.treatment..increased	0.00263305	0.551512
oxidative.stress.resistance..decreased	0.00186173	0.616626
protein.peptide.accumulation..increased	0.00176047	0.626386
replicative.lifespan..decreased	0.00170353	0.632028
stress.resistance..decreased	0.00166034	0.636384
mitochondrial.genome.maintenance..absent	0.00161334	0.641204
mitophagy..increased	0.00161334	0.641204
hyperosmotic.stress.resistance..decreased	0.00150891	0.652228
UV.resistance..decreased	0.000714538	0.756511
respiratory.growth..increased	0.000704736	0.758135
prion.formation..increased	0.00055115	0.785387
mutation.frequency..increased	0.000491857	0.796995
anaerobic.growth..decreased	0.000393944	0.817929
acid.pH.resistance..decreased	0.000392036	0.818363
sporulation.efficiency..increased	0.000217498	0.864187
transposable.element.transposition..decreased	0.000133605	0.893358
cell.death..absent	0.000125579	0.896592
X.ray.resistance..decreased	7.84917e-05	0.918161
competitive.fitness..increased	5.85997e-05	0.929257
autophagy..decreased	5.57462e-05	0.930996
lifespan..increased	3.59414e-05	0.944569
mitophagy..absent.or.decreased	3.04361e-05	0.948984
utilization.of.phosphorus.source..decreased	2.37514e-05	0.954927
redox.state..abnormal	8.19139e-06	0.973521
protein.activity..increased	7.43094e-06	0.97478
ionic.stress.resistance..decreased	5.60281e-06	0.9781
vegetative.growth..abnormal	3.23508e-06	0.983358

## Sheet: yeast_Dim3
	R2	p.value
oxidative.stress.resistance..increased	0.36977	3.25805e-15
respiratory.growth..increased	0.325061	3.54e-13
bud.morphology..abnormal	0.270047	7.66416e-11
cell.death..decreased	0.229974	3.04919e-09
telomere.length..decreased	0.196829	5.64107e-08
resistance.to.enzymatic.treatment..decreased	0.149417	3.0772e-06
mutation.frequency..increased	0.145363	4.29558e-06
chronological.lifespan..decreased	0.134987	1.00337e-05
alkaline.pH.resistance..decreased	0.132358	1.24254e-05
protein.peptide.accumulation..increased	0.109645	7.74e-05
mitophagy..absent.or.decreased	0.107495	9.18941e-05
respiratory.growth..absent.or.decreased.rate	0.102836	0.000133195
competitive.fitness..increased	0.10076	0.000157101
vacuolar.morphology..abnormal	0.0976694	0.000200789
chronological.lifespan..increased	0.0943151	0.000261948
inviable	0.0873906	0.000452936
fermentative.growth..decreased.rate	0.0863942	0.000490004
telomere.length..increased	0.083878	0.000597622
resistance.to.chemicals..increased	0.0799952	0.000811613
vegetative.growth..decreased	0.0791368	0.000868391
cell.shape..abnormal	0.0782835	0.000928758
mitochondrial.genome.maintenance..absent	0.0738903	0.00131248
mitophagy..increased	0.0738903	0.00131248
desiccation.resistance..decreased	0.0734441	0.00135938
gamma.ray.resistance..decreased	0.0669247	0.00227038
transposable.element.transposition..decreased	0.0576468	0.00471364
oxidative.stress.resistance..decreased	0.0569969	0.00496146
colony.appearance..abnormal	0.0537528	0.00640919
UV.resistance..decreased	0.0506767	0.00817403
sporulation..decreased	0.0505146	0.00827955
metal.resistance..decreased	0.044098	0.0137804
innate.thermotolerance..decreased	0.0427647	0.0153261
X.ray.resistance..decreased	0.0420282	0.0162545
freeze.thaw.resistance..decreased	0.0416851	0.0167062
stress.resistance..increased	0.0407749	0.0179679
RNA.localization..abnormal	0.039254	0.0202968
budding.pattern..abnormal	0.037631	0.0231241
killer.toxin.resistance..increased	0.0367082	0.0249083
chemical.compound.accumulation..abnormal	0.0342461	0.0303935
competitive.fitness..decreased	0.0325391	0.0349141
chitin.deposition..increased	0.0317043	0.0373724
sporulation.efficiency..increased	0.0314061	0.0382932
mitochondrial.morphology..abnormal	0.031088	0.0393017
utilization.of.carbon.source..decreased	0.0305867	0.0409469
mating.response..increased	0.0305044	0.0412238
autophagy..decreased	0.0278105	0.0514499
acquired.thermotolerance..decreased	0.0259394	0.0600883
autophagy..increased	0.0254399	0.0626426
pheromone.sensitivity..increased	0.0254399	0.0626426
protein.peptide.modification..increased	0.0254399	0.0626426
cold.sensitivity..increased	0.0246397	0.066977
chromosome.plasmid.maintenance..decreased	0.0229237	0.077376
lifespan..increased	0.022649	0.0791945
heat.sensitivity..increased	0.0206756	0.0936749
transposable.element.transposition..increased	0.0206263	0.094071
starvation.resistance..decreased	0.0205945	0.0943278
resistance.to.chemicals..decreased	0.0204149	0.095791
desiccation.resistance..increased	0.0200293	0.0990164
protein.peptide.distribution..abnormal	0.018835	0.109772
auxotrophy	0.0188268	0.10985
biofilm.formation..decreased	0.0185445	0.112575
metal.resistance..increased	0.0184195	0.113806
osmotic.stress.resistance..decreased	0.0179139	0.118935
replicative.lifespan..increased	0.0176882	0.121305
toxin.resistance..increased	0.0176791	0.121403
cell.cycle.progression.in.G1.phase..arrested.or.delayed	0.0146211	0.159277
lipid.particle.morphology..abnormal	0.0138504	0.170799
nuclear.export..decreased	0.0133682	0.178487
anaerobic.growth..decreased	0.0133209	0.179264
chromosome.plasmid.maintenance..abnormal	0.0114509	0.213276
critical.cell.size.at.START..G1.cell.size.checkpoint...increased	0.0113967	0.214369
chemical.compound.excretion..increased	0.0110639	0.221226
nutrient.utilization..decreased	0.0108444	0.22589
biofilm.formation..increased	0.0086837	0.278771
growth.in.exponential.phase..decreased.rate	0.00835868	0.287993
resistance.to.enzymatic.treatment..increased	0.00751178	0.313909
acid.pH.resistance..decreased	0.00742535	0.316719
vegetative.growth..abnormal	0.0073182	0.32025
colony.sectoring..increased	0.00698343	0.331617
stress.resistance..decreased	0.00625886	0.358122
utilization.of.nitrogen.source..absent.or.decreased	0.00521064	0.401888
haploproficient	0.00510081	0.406907
chitin.deposition..decreased	0.0045716	0.432428
hyperosmotic.stress.resistance..decreased	0.00400588	0.462484
toxin.resistance..decreased	0.00391079	0.467856
innate.thermotolerance..increased	0.0038014	0.474159
ionic.stress.resistance..decreased	0.00290258	0.531791
prion.formation..increased	0.00287313	0.533883
filamentous.growth..absent.or.decreased	0.00262929	0.551797
protein.activity..increased	0.00217202	0.58865
RNA.accumulation..abnormal	0.00204848	0.599464
cell.size..increased	0.0017953	0.62299
cold.sensitivity..decreased	0.00178772	0.623726
protein.peptide.accumulation..decreased	0.00160182	0.642398
utilization.of.phosphorus.source..decreased	0.00139758	0.664497
RNA.accumulation..decreased	0.00117747	0.690574
hyperosmotic.stress.resistance..increased	0.00108946	0.701793
killer.toxin.resistance..decreased	0.00108134	0.702854
redox.state..abnormal	0.000984228	0.715911
endocytosis..decreased	0.000953634	0.720174
invasive.growth..absent.or.decreased	0.000896407	0.728361
replicative.lifespan..decreased	0.000645397	0.768241
cell.size..decreased	0.000569485	0.781934
budding.index..decreased	0.000354795	0.827064
chemical.compound.accumulation..decreased	0.000309504	0.838317
mating.response..absent.or.decreased	0.000188704	0.873416
haploinsufficient	0.000147432	0.888009
chemical.compound.accumulation..increased	8.19533e-05	0.916382
cell.death..absent	3.26565e-05	0.947159
pseudohyphal.growth..absent.or.decreased	3.57174e-06	0.982513
critical.cell.size.at.START..G1.cell.size.checkpoint...decreased	8.61673e-07	0.991411

## Sheet: yeast_Dim4
	R2	p.value
X.ray.resistance..decreased	0.692548	2.18437e-36
resistance.to.enzymatic.treatment..increased	0.571054	1.38829e-26
vegetative.growth..abnormal	0.453996	1.83836e-19
sporulation.efficiency..increased	0.437765	1.35153e-18
UV.resistance..decreased	0.434276	2.06004e-18
gamma.ray.resistance..decreased	0.264462	1.2948e-10
oxidative.stress.resistance..decreased	0.184948	1.56474e-07
lipid.particle.morphology..abnormal	0.124295	2.38713e-05
protein.peptide.distribution..abnormal	0.120393	3.26926e-05
stress.resistance..increased	0.106109	0.000102628
vacuolar.morphology..abnormal	0.0920348	0.000313769
telomere.length..increased	0.0797234	0.000829176
chronological.lifespan..increased	0.0647453	0.00269508
replicative.lifespan..increased	0.0638682	0.00288769
auxotrophy	0.0496539	0.00886357
chromosome.plasmid.maintenance..abnormal	0.0397582	0.0194923
heat.sensitivity..increased	0.0397217	0.0195496
cell.size..decreased	0.039546	0.0198268
stress.resistance..decreased	0.0340575	0.0308617
cell.cycle.progression.in.G1.phase..arrested.or.delayed	0.0334789	0.0323454
chromosome.plasmid.maintenance..decreased	0.0320433	0.0363531
budding.pattern..abnormal	0.0317304	0.0372928
oxidative.stress.resistance..increased	0.0302753	0.0420047
innate.thermotolerance..decreased	0.0230609	0.0764848
competitive.fitness..increased	0.0219508	0.0840232
osmotic.stress.resistance..decreased	0.0215822	0.0866985
cell.size..increased	0.0213307	0.0885763
cell.shape..abnormal	0.0200511	0.0988302
inviable	0.0187496	0.110588
hyperosmotic.stress.resistance..decreased	0.016938	0.129565
growth.in.exponential.phase..decreased.rate	0.0162912	0.137187
fermentative.growth..decreased.rate	0.0155519	0.146513
sporulation..decreased	0.0149831	0.15417
toxin.resistance..decreased	0.0141205	0.166656
utilization.of.nitrogen.source..absent.or.decreased	0.0136513	0.173927
transposable.element.transposition..increased	0.0125833	0.191869
cell.death..decreased	0.0118775	0.204899
autophagy..increased	0.011578	0.210738
pheromone.sensitivity..increased	0.011578	0.210738
protein.peptide.modification..increased	0.011578	0.210738
colony.appearance..abnormal	0.0104063	0.235557
critical.cell.size.at.START..G1.cell.size.checkpoint...increased	0.0100055	0.244837
killer.toxin.resistance..decreased	0.00948835	0.257474
telomere.length..decreased	0.00913877	0.26647
autophagy..decreased	0.00849113	0.28419
toxin.resistance..increased	0.00843652	0.28575
filamentous.growth..absent.or.decreased	0.00801026	0.298311
budding.index..decreased	0.00726236	0.32211
nutrient.utilization..decreased	0.00697828	0.331795
mating.response..absent.or.decreased	0.00695933	0.332455
resistance.to.chemicals..increased	0.00681507	0.337535
respiratory.growth..absent.or.decreased.rate	0.00668481	0.34221
desiccation.resistance..decreased	0.00666451	0.342947
lifespan..increased	0.00643215	0.35153
desiccation.resistance..increased	0.00630507	0.356347
colony.sectoring..increased	0.00626968	0.357705
chitin.deposition..increased	0.00607097	0.36546
chemical.compound.accumulation..decreased	0.00601143	0.367829
resistance.to.enzymatic.treatment..decreased	0.00595975	0.369902
mitophagy..absent.or.decreased	0.00586144	0.373892
ionic.stress.resistance..decreased	0.0058337	0.375028
chemical.compound.excretion..increased	0.00538063	0.394295
starvation.resistance..decreased	0.00516473	0.403975
chemical.compound.accumulation..increased	0.00476953	0.422611
biofilm.formation..decreased	0.00455865	0.433081
resistance.to.chemicals..decreased	0.00434721	0.443978
RNA.accumulation..decreased	0.00412715	0.455773
RNA.localization..abnormal	0.00409171	0.457718
endocytosis..decreased	0.00388827	0.469142
haploproficient	0.00346384	0.494509
bud.morphology..abnormal	0.00294016	0.529143
acid.pH.resistance..decreased	0.00290537	0.531593
vegetative.growth..decreased	0.0027764	0.54086
haploinsufficient	0.00274904	0.542864
mitochondrial.morphology..abnormal	0.00270642	0.546012
utilization.of.phosphorus.source..decreased	0.00242523	0.567673
mating.response..increased	0.00228792	0.578861
pseudohyphal.growth..absent.or.decreased	0.00226816	0.580507
acquired.thermotolerance..decreased	0.00214192	0.591248
cold.sensitivity..increased	0.00188449	0.614479
innate.thermotolerance..increased	0.00151472	0.651603
alkaline.pH.resistance..decreased	0.00128077	0.678009
protein.activity..increased	0.00117245	0.691201
utilization.of.carbon.source..decreased	0.00115446	0.693459
prion.formation..increased	0.00102297	0.710618
respiratory.growth..increased	0.000948388	0.720913
chronological.lifespan..decreased	0.000685342	0.761385
biofilm.formation..increased	0.000587599	0.778581
transposable.element.transposition..decreased	0.000567254	0.782351
mitochondrial.genome.maintenance..absent	0.000513206	0.792733
mitophagy..increased	0.000513206	0.792733
protein.peptide.accumulation..decreased	0.000378373	0.821502
chitin.deposition..decreased	0.000332653	0.832465
chemical.compound.accumulation..abnormal	0.000328466	0.833508
competitive.fitness..decreased	0.000301456	0.840405
nuclear.export..decreased	0.000278946	0.846403
freeze.thaw.resistance..decreased	0.000191718	0.872417
metal.resistance..decreased	0.000178766	0.876767
metal.resistance..increased	0.000148227	0.88771
RNA.accumulation..abnormal	0.000114568	0.901205
anaerobic.growth..decreased	0.000102435	0.906558
protein.peptide.accumulation..increased	7.33918e-05	0.920856
mutation.frequency..increased	7.22646e-05	0.921464
redox.state..abnormal	6.46373e-05	0.925711
invasive.growth..absent.or.decreased	5.14812e-05	0.933682
replicative.lifespan..decreased	3.78012e-05	0.943155
critical.cell.size.at.START..G1.cell.size.checkpoint...decreased	1.71471e-05	0.961697
hyperosmotic.stress.resistance..increased	8.97561e-06	0.972283
cell.death..absent	4.86308e-06	0.979596
cold.sensitivity..decreased	1.00565e-06	0.990721
killer.toxin.resistance..increased	1.98863e-07	0.995874

## Sheet: yeast_Dim5
	R2	p.value
cell.shape..abnormal	0.258836	2.1879e-10
budding.pattern..abnormal	0.249375	5.24225e-10
telomere.length..decreased	0.205565	2.64208e-08
mitochondrial.genome.maintenance..absent	0.203382	3.19546e-08
mitophagy..increased	0.203382	3.19546e-08
RNA.localization..abnormal	0.152583	2.36943e-06
protein.peptide.accumulation..increased	0.128283	1.72922e-05
oxidative.stress.resistance..decreased	0.122663	2.72294e-05
anaerobic.growth..decreased	0.121925	2.88972e-05
growth.in.exponential.phase..decreased.rate	0.111188	6.84164e-05
critical.cell.size.at.START..G1.cell.size.checkpoint...increased	0.105227	0.000110101
chronological.lifespan..decreased	0.104945	0.000112602
metal.resistance..increased	0.0869875	0.000467584
hyperosmotic.stress.resistance..decreased	0.085441	0.000528291
bud.morphology..abnormal	0.0826525	0.000658257
killer.toxin.resistance..decreased	0.0811095	0.000743386
stress.resistance..decreased	0.0748917	0.00121302
chromosome.plasmid.maintenance..decreased	0.072835	0.00142612
replicative.lifespan..increased	0.0697931	0.00181174
auxotrophy	0.0623994	0.00324161
chromosome.plasmid.maintenance..abnormal	0.0573843	0.0048122
colony.appearance..abnormal	0.0555893	0.00554413
cold.sensitivity..increased	0.05508	0.00577153
mutation.frequency..increased	0.0471932	0.0107736
protein.activity..increased	0.0454491	0.0123752
freeze.thaw.resistance..decreased	0.0442711	0.0135917
protein.peptide.accumulation..decreased	0.0423965	0.0157833
pseudohyphal.growth..absent.or.decreased	0.0423796	0.0158046
vegetative.growth..abnormal	0.040104	0.0189597
osmotic.stress.resistance..decreased	0.0392315	0.0203335
toxin.resistance..increased	0.0371775	0.0239839
X.ray.resistance..decreased	0.0364763	0.0253785
filamentous.growth..absent.or.decreased	0.0362638	0.0258173
chemical.compound.accumulation..decreased	0.035319	0.0278649
mating.response..increased	0.0341996	0.0305081
UV.resistance..decreased	0.0312056	0.0389258
resistance.to.chemicals..decreased	0.0309962	0.0395979
nutrient.utilization..decreased	0.0307052	0.0405517
desiccation.resistance..increased	0.0273224	0.0535695
innate.thermotolerance..increased	0.0269336	0.0553238
endocytosis..decreased	0.0254235	0.0627284
sporulation.efficiency..increased	0.0240972	0.0700945
oxidative.stress.resistance..increased	0.0223966	0.0809047
fermentative.growth..decreased.rate	0.0219953	0.0837066
gamma.ray.resistance..decreased	0.0212974	0.088828
autophagy..decreased	0.0210786	0.0905023
telomere.length..increased	0.0209601	0.0914234
colony.sectoring..increased	0.0206508	0.093874
chemical.compound.accumulation..abnormal	0.0198833	0.100268
inviable	0.0193916	0.104609
respiratory.growth..absent.or.decreased.rate	0.0191935	0.106416
cell.size..increased	0.0173641	0.124801
starvation.resistance..decreased	0.0173618	0.124826
chemical.compound.accumulation..increased	0.0171799	0.126836
killer.toxin.resistance..increased	0.0158651	0.142478
chronological.lifespan..increased	0.015158	0.151769
toxin.resistance..decreased	0.0148956	0.155388
vegetative.growth..decreased	0.0143268	0.163569
chitin.deposition..decreased	0.0142477	0.164746
hyperosmotic.stress.resistance..increased	0.0135227	0.175983
stress.resistance..increased	0.0130231	0.184235
vacuolar.morphology..abnormal	0.012916	0.186061
cell.death..absent	0.0124688	0.193916
desiccation.resistance..decreased	0.0119638	0.203252
resistance.to.chemicals..increased	0.0114131	0.214037
acquired.thermotolerance..decreased	0.0109476	0.223682
utilization.of.carbon.source..decreased	0.00939867	0.259746
critical.cell.size.at.START..G1.cell.size.checkpoint...decreased	0.0077417	0.306587
resistance.to.enzymatic.treatment..decreased	0.00745225	0.315841
utilization.of.nitrogen.source..absent.or.decreased	0.0064517	0.350797
cell.death..decreased	0.0060566	0.36603
ionic.stress.resistance..decreased	0.00531544	0.397182
competitive.fitness..decreased	0.00460904	0.430544
alkaline.pH.resistance..decreased	0.00430606	0.446147
resistance.to.enzymatic.treatment..increased	0.0042396	0.449686
chitin.deposition..increased	0.00408784	0.457931
budding.index..decreased	0.00404587	0.460254
redox.state..abnormal	0.00388888	0.469107
transposable.element.transposition..decreased	0.00380061	0.474206
lipid.particle.morphology..abnormal	0.0036889	0.480786
RNA.accumulation..decreased	0.00296143	0.527654
heat.sensitivity..increased	0.00294255	0.528975
chemical.compound.excretion..increased	0.00290331	0.531739
biofilm.formation..decreased	0.00288569	0.532989
haploinsufficient	0.00287602	0.533677
utilization.of.phosphorus.source..decreased	0.00286871	0.534198
metal.resistance..decreased	0.00262834	0.551869
cell.cycle.progression.in.G1.phase..arrested.or.delayed	0.0023154	0.576587
cold.sensitivity..decreased	0.00228463	0.579134
mitophagy..absent.or.decreased	0.00213773	0.591611
cell.size..decreased	0.00183869	0.618817
invasive.growth..absent.or.decreased	0.00183291	0.61937
lifespan..increased	0.00156307	0.646455
sporulation..decreased	0.00151441	0.651636
competitive.fitness..increased	0.00117101	0.691382
RNA.accumulation..abnormal	0.00103331	0.709224
haploproficient	0.000886458	0.729814
transposable.element.transposition..increased	0.000789141	0.744533
acid.pH.resistance..decreased	0.000584796	0.779096
biofilm.formation..increased	0.000511844	0.793002
nuclear.export..decreased	0.000506764	0.794009
respiratory.growth..increased	0.000479265	0.799555
replicative.lifespan..decreased	0.00026502	0.85024
autophagy..increased	0.00021425	0.865196
pheromone.sensitivity..increased	0.00021425	0.865196
protein.peptide.modification..increased	0.00021425	0.865196
innate.thermotolerance..decreased	0.000175873	0.877761
protein.peptide.distribution..abnormal	0.000152974	0.885938
mitochondrial.morphology..abnormal	0.000122949	0.897675
mating.response..absent.or.decreased	8.65585e-05	0.914074
prion.formation..increased	4.47694e-05	0.938147

## Sheet: yeast_Dim6
	R2	p.value
chromosome.plasmid.maintenance..decreased	0.239159	1.33166e-09
toxin.resistance..increased	0.202996	3.30464e-08
mutation.frequency..increased	0.173789	4.03296e-07
sporulation..decreased	0.146461	3.92509e-06
chromosome.plasmid.maintenance..abnormal	0.136186	9.10065e-06
protein.peptide.accumulation..increased	0.10911	8.07776e-05
mitophagy..absent.or.decreased	0.108329	8.59728e-05
colony.sectoring..increased	0.100658	0.000158379
vegetative.growth..abnormal	0.095449	0.000239443
telomere.length..decreased	0.0897086	0.00037714
mitochondrial.genome.maintenance..absent	0.0871754	0.000460696
mitophagy..increased	0.0871754	0.000460696
innate.thermotolerance..decreased	0.0829593	0.000642525
pseudohyphal.growth..absent.or.decreased	0.0826579	0.000657975
bud.morphology..abnormal	0.0826368	0.00065907
stress.resistance..decreased	0.0788558	0.000887825
cold.sensitivity..increased	0.076732	0.00104943
X.ray.resistance..decreased	0.0734353	0.00136033
invasive.growth..absent.or.decreased	0.0730386	0.00140346
mating.response..increased	0.0670716	0.0022443
UV.resistance..decreased	0.0604515	0.00377896
chemical.compound.excretion..increased	0.0593137	0.00413332
innate.thermotolerance..increased	0.0568125	0.00503417
filamentous.growth..absent.or.decreased	0.0561984	0.00528403
stress.resistance..increased	0.054124	0.006224
vacuolar.morphology..abnormal	0.0530844	0.00675673
sporulation.efficiency..increased	0.0526663	0.00698374
colony.appearance..abnormal	0.0486835	0.00957209
alkaline.pH.resistance..decreased	0.0458737	0.0119643
oxidative.stress.resistance..decreased	0.0441952	0.0136741
nutrient.utilization..decreased	0.0425504	0.0155905
protein.peptide.accumulation..decreased	0.0414964	0.0169603
freeze.thaw.resistance..decreased	0.0335752	0.0320934
utilization.of.phosphorus.source..decreased	0.0334896	0.0323174
autophagy..decreased	0.0328758	0.0339705
chronological.lifespan..decreased	0.0313191	0.0385664
critical.cell.size.at.START..G1.cell.size.checkpoint...decreased	0.0278161	0.0514258
cell.size..decreased	0.0277707	0.0516192
telomere.length..increased	0.0276508	0.0521336
hyperosmotic.stress.resistance..decreased	0.0273689	0.0533638
utilization.of.carbon.source..decreased	0.0269403	0.0552929
competitive.fitness..increased	0.0252917	0.0634225
cell.size..increased	0.0231001	0.0762321
chitin.deposition..decreased	0.0205732	0.0944998
metal.resistance..increased	0.0205107	0.0950077
cell.cycle.progression.in.G1.phase..arrested.or.delayed	0.0201448	0.0980378
haploinsufficient	0.020038	0.0989424
transposable.element.transposition..decreased	0.0193341	0.10513
ionic.stress.resistance..decreased	0.0189191	0.108975
haploproficient	0.0188669	0.109469
utilization.of.nitrogen.source..absent.or.decreased	0.0185041	0.112972
gamma.ray.resistance..decreased	0.0174555	0.123804
killer.toxin.resistance..decreased	0.0170961	0.127774
chitin.deposition..increased	0.0162424	0.137782
cell.shape..abnormal	0.0158433	0.142755
desiccation.resistance..decreased	0.0145463	0.160356
protein.peptide.distribution..abnormal	0.0143702	0.162928
RNA.localization..abnormal	0.0126968	0.189865
respiratory.growth..increased	0.0120124	0.202331
biofilm.formation..decreased	0.0116239	0.209831
lifespan..increased	0.00851281	0.283573
hyperosmotic.stress.resistance..increased	0.00815641	0.293927
toxin.resistance..decreased	0.00789925	0.301697
fermentative.growth..decreased.rate	0.00757964	0.311725
budding.pattern..abnormal	0.00753406	0.313189
autophagy..increased	0.00719661	0.324318
pheromone.sensitivity..increased	0.00719661	0.324318
protein.peptide.modification..increased	0.00719661	0.324318
mitochondrial.morphology..abnormal	0.00700958	0.33071
RNA.accumulation..decreased	0.00675048	0.339842
heat.sensitivity..increased	0.00600633	0.368033
inviable	0.00579567	0.376594
endocytosis..decreased	0.00559187	0.385142
oxidative.stress.resistance..increased	0.005475	0.390168
acid.pH.resistance..decreased	0.00494354	0.414253
lipid.particle.morphology..abnormal	0.00473845	0.42413
osmotic.stress.resistance..decreased	0.00455683	0.433173
replicative.lifespan..increased	0.00450023	0.436051
desiccation.resistance..increased	0.00408181	0.458264
protein.activity..increased	0.00406333	0.459285
resistance.to.enzymatic.treatment..decreased	0.00368604	0.480957
acquired.thermotolerance..decreased	0.00254414	0.558318
chemical.compound.accumulation..abnormal	0.00227813	0.579675
nuclear.export..decreased	0.00195578	0.607853
cell.death..decreased	0.00186268	0.616536
resistance.to.enzymatic.treatment..increased	0.00184597	0.618123
anaerobic.growth..decreased	0.0017357	0.628826
prion.formation..increased	0.00168599	0.633788
RNA.accumulation..abnormal	0.00167974	0.634419
biofilm.formation..increased	0.00151019	0.65209
critical.cell.size.at.START..G1.cell.size.checkpoint...increased	0.00140411	0.663761
transposable.element.transposition..increased	0.00134758	0.670195
respiratory.growth..absent.or.decreased.rate	0.00131864	0.673552
growth.in.exponential.phase..decreased.rate	0.0013069	0.674925
budding.index..decreased	0.00108297	0.702641
mating.response..absent.or.decreased	0.000905236	0.727079
auxotrophy	0.000603798	0.77563
vegetative.growth..decreased	0.000542683	0.787002
resistance.to.chemicals..decreased	0.000536231	0.788242
cold.sensitivity..decreased	0.000373726	0.822584
chronological.lifespan..increased	0.000305219	0.839425
starvation.resistance..decreased	0.000247846	0.855119
competitive.fitness..decreased	0.000219049	0.863709
replicative.lifespan..decreased	0.000200309	0.869615
metal.resistance..decreased	0.000176186	0.877653
killer.toxin.resistance..increased	0.000104746	0.905515
cell.death..absent	6.3822e-05	0.92618
redox.state..abnormal	1.95681e-05	0.959084
chemical.compound.accumulation..increased	8.79388e-06	0.972565
resistance.to.chemicals..increased	5.8026e-07	0.992951
chemical.compound.accumulation..decreased	1.14505e-07	0.996869

## Sheet: yeast_Dim7
	R2	p.value
cell.size..decreased	0.236835	1.6437e-09
mitochondrial.genome.maintenance..absent	0.204763	2.83337e-08
mitophagy..increased	0.204763	2.83337e-08
mitophagy..absent.or.decreased	0.201417	3.79089e-08
anaerobic.growth..decreased	0.14074	6.27463e-06
haploproficient	0.140517	6.39018e-06
innate.thermotolerance..decreased	0.128637	1.6803e-05
mutation.frequency..increased	0.113381	5.74025e-05
cell.cycle.progression.in.G1.phase..arrested.or.delayed	0.103814	0.00012322
growth.in.exponential.phase..decreased.rate	0.101829	0.000144295
autophagy..decreased	0.095603	0.000236539
metal.resistance..decreased	0.0916095	0.000324508
alkaline.pH.resistance..decreased	0.0730509	0.00140211
desiccation.resistance..decreased	0.0717716	0.00155058
budding.index..decreased	0.064276	0.00279647
protein.peptide.accumulation..increased	0.0602495	0.00383958
acquired.thermotolerance..decreased	0.0557785	0.005462
inviable	0.0530269	0.00678755
mating.response..absent.or.decreased	0.0486717	0.00958111
mating.response..increased	0.0428995	0.0151622
critical.cell.size.at.START..G1.cell.size.checkpoint...increased	0.040972	0.0176867
heat.sensitivity..increased	0.0402649	0.0187168
auxotrophy	0.0377327	0.0229356
bud.morphology..abnormal	0.0376587	0.0230727
vacuolar.morphology..abnormal	0.0374192	0.0235218
protein.activity..increased	0.0330667	0.0334471
cell.shape..abnormal	0.0288382	0.0472678
replicative.lifespan..decreased	0.0261138	0.0592223
hyperosmotic.stress.resistance..decreased	0.0256562	0.0615227
hyperosmotic.stress.resistance..increased	0.0256492	0.061559
biofilm.formation..decreased	0.0256024	0.0617994
stress.resistance..increased	0.0245209	0.0676469
colony.appearance..abnormal	0.0236356	0.0728681
oxidative.stress.resistance..increased	0.0217748	0.0852891
nuclear.export..decreased	0.0215066	0.0872583
budding.pattern..abnormal	0.0209226	0.0917165
resistance.to.chemicals..increased	0.0207317	0.0932264
telomere.length..increased	0.0206945	0.0935237
killer.toxin.resistance..decreased	0.0205223	0.0949136
protein.peptide.distribution..abnormal	0.0202577	0.0970923
nutrient.utilization..decreased	0.0193829	0.104688
desiccation.resistance..increased	0.0187001	0.111064
starvation.resistance..decreased	0.0167007	0.132305
sporulation.efficiency..increased	0.0166148	0.133313
ionic.stress.resistance..decreased	0.0158227	0.143017
competitive.fitness..increased	0.0142686	0.164434
freeze.thaw.resistance..decreased	0.0125945	0.191669
lipid.particle.morphology..abnormal	0.0124971	0.193407
respiratory.growth..increased	0.011837	0.205679
gamma.ray.resistance..decreased	0.0113435	0.215448
chitin.deposition..increased	0.0110962	0.22055
critical.cell.size.at.START..G1.cell.size.checkpoint...decreased	0.0110433	0.221658
chemical.compound.accumulation..abnormal	0.0107626	0.227658
utilization.of.phosphorus.source..decreased	0.0107126	0.228748
osmotic.stress.resistance..decreased	0.0106759	0.22955
metal.resistance..increased	0.00839432	0.286964
prion.formation..increased	0.00826688	0.290667
protein.peptide.accumulation..decreased	0.00810496	0.295461
RNA.localization..abnormal	0.00804163	0.297363
chromosome.plasmid.maintenance..decreased	0.00801197	0.29826
chronological.lifespan..increased	0.00773015	0.30695
stress.resistance..decreased	0.00767286	0.308756
X.ray.resistance..decreased	0.00732322	0.320083
respiratory.growth..absent.or.decreased.rate	0.00727341	0.321741
transposable.element.transposition..decreased	0.00714784	0.325969
replicative.lifespan..increased	0.00580554	0.376186
endocytosis..decreased	0.00549894	0.389131
oxidative.stress.resistance..decreased	0.00445601	0.43832
resistance.to.enzymatic.treatment..increased	0.00429893	0.446525
autophagy..increased	0.00415914	0.454028
pheromone.sensitivity..increased	0.00415914	0.454028
protein.peptide.modification..increased	0.00415914	0.454028
vegetative.growth..decreased	0.00385028	0.471326
cold.sensitivity..increased	0.00380707	0.473829
toxin.resistance..decreased	0.00371633	0.479157
chronological.lifespan..decreased	0.0036396	0.483739
telomere.length..decreased	0.00344908	0.495433
competitive.fitness..decreased	0.0033037	0.504678
cold.sensitivity..decreased	0.00324873	0.50825
transposable.element.transposition..increased	0.00322631	0.509719
haploinsufficient	0.00300802	0.52442
chemical.compound.excretion..increased	0.0028737	0.533842
cell.size..increased	0.00280618	0.538695
resistance.to.enzymatic.treatment..decreased	0.00261556	0.552839
cell.death..absent	0.00200352	0.603503
chemical.compound.accumulation..increased	0.00174645	0.627764
redox.state..abnormal	0.00119557	0.688328
UV.resistance..decreased	0.00104197	0.708063
toxin.resistance..increased	0.000595248	0.777182
innate.thermotolerance..increased	0.000565636	0.782654
mitochondrial.morphology..abnormal	0.000322038	0.835121
chemical.compound.accumulation..decreased	0.000282716	0.845381
resistance.to.chemicals..decreased	0.000272923	0.84805
killer.toxin.resistance..increased	0.000227871	0.861018
colony.sectoring..increased	0.000221703	0.862893
filamentous.growth..absent.or.decreased	0.000221681	0.8629
biofilm.formation..increased	0.000218105	0.864
utilization.of.carbon.source..decreased	0.000174924	0.878088
lifespan..increased	0.000114473	0.901246
sporulation..decreased	0.000105486	0.905183
chromosome.plasmid.maintenance..abnormal	9.09438e-05	0.911933
vegetative.growth..abnormal	7.56385e-05	0.919657
RNA.accumulation..decreased	6.60265e-05	0.92492
chitin.deposition..decreased	4.29903e-05	0.939386
cell.death..decreased	2.4104e-05	0.954594
utilization.of.nitrogen.source..absent.or.decreased	2.39565e-05	0.954733
fermentative.growth..decreased.rate	2.25319e-05	0.956098
pseudohyphal.growth..absent.or.decreased	2.07804e-05	0.957837
acid.pH.resistance..decreased	1.14507e-05	0.968695
invasive.growth..absent.or.decreased	9.69675e-07	0.990888
RNA.accumulation..abnormal	5.22114e-07	0.993314

## Sheet: yeast_Dim8
	R2	p.value
invasive.growth..absent.or.decreased	0.384687	6.34544e-16
filamentous.growth..absent.or.decreased	0.233112	2.29985e-09
cold.sensitivity..increased	0.207305	2.26955e-08
mating.response..absent.or.decreased	0.128393	1.71392e-05
biofilm.formation..increased	0.104202	0.000119471
RNA.localization..abnormal	0.0977275	0.000199867
colony.appearance..abnormal	0.0973333	0.000206215
replicative.lifespan..increased	0.0972321	0.000207878
respiratory.growth..absent.or.decreased.rate	0.0871589	0.000461299
utilization.of.carbon.source..decreased	0.0856083	0.000521365
chemical.compound.excretion..increased	0.084822	0.000554737
metal.resistance..decreased	0.0815701	0.000716889
metal.resistance..increased	0.0784299	0.000918106
haploinsufficient	0.0692897	0.00188493
mitochondrial.morphology..abnormal	0.0623895	0.00324414
utilization.of.nitrogen.source..absent.or.decreased	0.0540321	0.00626935
pseudohyphal.growth..absent.or.decreased	0.0536983	0.00643683
inviable	0.0522366	0.00722504
freeze.thaw.resistance..decreased	0.0500632	0.00858086
ionic.stress.resistance..decreased	0.0477368	0.0103186
competitive.fitness..decreased	0.0438682	0.0140351
colony.sectoring..increased	0.0367908	0.0247431
transposable.element.transposition..decreased	0.0365906	0.0251458
osmotic.stress.resistance..decreased	0.0352678	0.0279804
nutrient.utilization..decreased	0.0350278	0.0285289
chitin.deposition..decreased	0.0343158	0.0302221
acid.pH.resistance..decreased	0.0322379	0.0357812
protein.peptide.accumulation..increased	0.029413	0.0450848
critical.cell.size.at.START..G1.cell.size.checkpoint...increased	0.028812	0.0473701
telomere.length..increased	0.0285919	0.0482366
killer.toxin.resistance..decreased	0.0269117	0.0554244
telomere.length..decreased	0.0231342	0.076013
heat.sensitivity..increased	0.0225134	0.0801086
chromosome.plasmid.maintenance..decreased	0.0224783	0.0803469
oxidative.stress.resistance..increased	0.0220048	0.083639
resistance.to.enzymatic.treatment..decreased	0.0183243	0.114753
desiccation.resistance..decreased	0.0177583	0.120564
prion.formation..increased	0.0172456	0.126106
chemical.compound.accumulation..decreased	0.0172427	0.126138
cell.size..increased	0.0151758	0.151527
vegetative.growth..abnormal	0.0144035	0.162438
alkaline.pH.resistance..decreased	0.013816	0.171335
lipid.particle.morphology..abnormal	0.0122927	0.197113
endocytosis..decreased	0.0110599	0.221311
replicative.lifespan..decreased	0.0108886	0.224941
critical.cell.size.at.START..G1.cell.size.checkpoint...decreased	0.0104264	0.235102
oxidative.stress.resistance..decreased	0.0104169	0.235315
mitophagy..absent.or.decreased	0.0100803	0.243071
competitive.fitness..increased	0.00932476	0.261637
autophagy..decreased	0.00918724	0.2652
mitochondrial.genome.maintenance..absent	0.00894889	0.271519
mitophagy..increased	0.00894889	0.271519
chitin.deposition..increased	0.00853978	0.282809
desiccation.resistance..increased	0.00765786	0.309231
sporulation.efficiency..increased	0.00755503	0.312515
acquired.thermotolerance..decreased	0.00741068	0.3172
resistance.to.chemicals..decreased	0.00737526	0.318363
toxin.resistance..decreased	0.00685268	0.3362
utilization.of.phosphorus.source..decreased	0.00674104	0.340181
innate.thermotolerance..increased	0.00645649	0.350617
stress.resistance..decreased	0.00619452	0.360612
protein.peptide.distribution..abnormal	0.00600047	0.368268
gamma.ray.resistance..decreased	0.00584578	0.374532
chromosome.plasmid.maintenance..abnormal	0.00577569	0.37742
chemical.compound.accumulation..increased	0.0053968	0.393584
protein.peptide.accumulation..decreased	0.0053636	0.395046
sporulation..decreased	0.00517439	0.403534
vegetative.growth..decreased	0.004841	0.419149
mutation.frequency..increased	0.00402273	0.461542
innate.thermotolerance..decreased	0.00392291	0.467165
RNA.accumulation..abnormal	0.0037447	0.477481
cell.size..decreased	0.00351449	0.491366
stress.resistance..increased	0.00343366	0.496399
transposable.element.transposition..increased	0.00329211	0.505427
chronological.lifespan..increased	0.00323807	0.508948
chronological.lifespan..decreased	0.00312095	0.516724
X.ray.resistance..decreased	0.00310857	0.517558
cell.death..absent	0.0030156	0.523898
bud.morphology..abnormal	0.00289499	0.532329
autophagy..increased	0.00270138	0.546387
pheromone.sensitivity..increased	0.00270138	0.546387
protein.peptide.modification..increased	0.00270138	0.546387
starvation.resistance..decreased	0.00258515	0.555159
anaerobic.growth..decreased	0.00256301	0.55686
cell.cycle.progression.in.G1.phase..arrested.or.delayed	0.00219406	0.586763
budding.pattern..abnormal	0.00175822	0.626607
chemical.compound.accumulation..abnormal	0.00170789	0.631591
growth.in.exponential.phase..decreased.rate	0.00137813	0.666698
UV.resistance..decreased	0.00129319	0.67654
nuclear.export..decreased	0.00118007	0.69025
haploproficient	0.000943419	0.721615
biofilm.formation..decreased	0.000935897	0.722681
RNA.accumulation..decreased	0.000780195	0.745936
hyperosmotic.stress.resistance..increased	0.000696186	0.759562
budding.index..decreased	0.000663414	0.765121
cold.sensitivity..decreased	0.000648891	0.767632
auxotrophy	0.00061986	0.772745
hyperosmotic.stress.resistance..decreased	0.000582431	0.779532
killer.toxin.resistance..increased	0.000511763	0.793018
toxin.resistance..increased	0.000483472	0.798696
vacuolar.morphology..abnormal	0.000411294	0.814034
mating.response..increased	0.000335522	0.831755
cell.shape..abnormal	0.000329898	0.83315
fermentative.growth..decreased.rate	0.000187304	0.873882
protein.activity..increased	0.000178992	0.87669
resistance.to.chemicals..increased	0.00016824	0.880422
redox.state..abnormal	2.90555e-05	0.950153
resistance.to.enzymatic.treatment..increased	2.53353e-05	0.95345
cell.death..decreased	2.4394e-05	0.954322
respiratory.growth..increased	7.99398e-06	0.973842
lifespan..increased	3.31667e-06	0.983149

[truncated: 10 more sheets: yeast_Dim9, yeast_Dim10, yeast_Dim11, yeast_genes_cos2, yeast_gof_phenotypes, yeast_gof_eigen, yeast_gof_Dim1, yeast_gof_Dim2, yeast_gof_Dim3, yeast_gof_genes_cos2]
